# Supplementary material
Source: Research Square preprint supplement (doi:10.21203/rs.3.rs-9066746/v1)
Supplement: Supplementary file 1 [file 6042500452574ad29968b773.xlsx]

## Sheet: expt 1 raw
session	snake	trial	correct	event	time
1	1	1	L	1	0
1	1	1	L	3	10
1	1	2	R	1	0
1	1	2	R	3	11
1	1	2	R	11	32
1	1	2	R	1	68
1	1	2	R	5	83
1	1	2	R	8	91
1	1	2	R	3	102
1	1	2	R	11	113
1	1	2	R	1	232
1	1	2	R	3	241
1	1	2	R	11	253
1	1	2	R	1	333
1	1	2	R	5	347
1	1	2	R	8	351
1	1	2	R	4	403
1	1	3	L	1	0
1	1	3	L	5	15
1	1	3	L	8	62
1	1	3	L	3	75
2	1	1	R	1	0
2	1	1	R	4	7
2	1	2	L	1	0
2	1	2	L	3	8
2	1	3	R	1	0
2	1	3	R	3	10
2	1	3	R	11	42
2	1	3	R	1	100
2	1	3	R	5	118
2	1	3	R	8	122
2	1	3	R	4	139
3	1	1	L	1	0
3	1	2	L	3	6
3	1	3	L	1	0
3	1	3	L	3	7
3	1	4	R	1	0
3	1	4	R	5	8
3	1	4	R	8	17
3	1	4	R	3	24
3	1	4	R	11	30
3	1	4	R	1	134
3	1	4	R	4	139
4	1	1	L	1	0
4	1	1	L	4	8
4	1	1	L	11	10
4	1	1	L	1	52
4	1	1	L	3	62
4	1	2	L	1	0
4	1	2	L	3	8
4	1	3	L	1	0
4	1	3	L	4	14
4	1	3	L	11	25
4	1	3	L	1	69
4	1	3	L	3	79
4	1	4	L	1	0
4	1	4	L	3	17
6	1	1	L	1	0
6	1	1	L	3	4
6	1	2	L	1	0
6	1	2	L	3	6
6	1	3	L	4	8
6	1	3	L	1	0
6	1	3	L	4	12
6	1	3	L	5	55
6	1	3	L	8	60
6	1	3	L	3	71
6	1	4	R	1	0
6	1	4	R	4	5
7	1	1	L	1	0
7	1	1	L	4	7
7	1	1	L	11	33
7	1	1	L	1	43
7	1	1	L	3	47
7	1	2	R	1	0
7	1	2	R	4	4
7	1	3	L	1	0
7	1	3	L	3	5
7	1	4	L	1	0
7	1	4	L	3	8
8	1	1	L	1	0
8	1	1	L	3	4
8	1	2	L	1	0
8	1	2	L	4	9
8	1	2	L	11	73
8	1	2	L	1	82
8	1	2	L	4	92
8	1	2	L	11	197
8	1	2	L	1	203
8	1	2	L	4	216
8	1	2	L	11	298
8	1	2	L	1	307
8	1	2	L	3	317
8	1	3	R	1	0
8	1	3	R	3	7
8	1	3	R	11	85
8	1	3	R	1	91
8	1	3	R	4	97
8	1	4	R	1	0
8	1	4	R	4	3
9	1	1	R	1	0
9	1	1	R	3	4
9	1	1	R	11	68
9	1	1	R	1	72
9	1	1	R	4	78
9	1	2	R	1	0
9	1	2	R	3	9
9	1	2	R	11	99
9	1	2	R	1	102
9	1	2	R	4	110
9	1	3	L	1	0
9	1	3	L	3	5
9	1	4	R	1	0
9	1	4	R	4	3
10	1	1	L	1	0
10	1	1	L	4	23
10	1	1	L	11	66
10	1	1	L	1	145
10	1	1	L	5	161
10	1	1	L	8	169
10	1	1	L	5	211
10	1	1	L	8	219
10	1	1	L	3	245
10	1	2	R	1	0
10	1	2	R	5	13
10	1	2	R	8	17
10	1	2	R	4	143
10	1	3	L	1	0
10	1	3	L	4	14
10	1	3	L	7	23
10	1	3	L	2	31
10	1	3	L	1	67
10	1	3	L	3	120
10	1	4	R	1	0
10	1	4	R	3	3
10	1	4	R	11	70
10	1	4	R	1	102
10	1	4	R	4	116
11	1	1	L	1	0
11	1	1	L	3	4
11	1	2	R	1	0
11	1	2	R	2	12
11	1	2	R	1	20
11	1	2	R	4	34
11	1	3	R	1	0
11	1	3	R	3	12
11	1	3	R	11	58
11	1	3	R	1	65
11	1	3	R	5	81
11	1	3	R	8	94
11	1	3	R	4	108
11	1	4	R	1	0
11	1	4	R	4	4
12	1	1	L	1	0
12	1	1	L	4	5
12	1	1	L	11	61
12	1	1	L	1	68
12	1	1	L	3	73
12	1	2	L	1	0
12	1	2	L	2	17
12	1	2	L	1	22
12	1	2	L	3	33
12	1	3	L	1	0
12	1	3	L	4	8
12	1	3	L	11	77
12	1	3	L	1	88
12	1	3	L	3	90
12	1	4	L	1	0
12	1	4	L	4	4
12	1	4	L	11	69
12	1	4	L	1	76
12	1	4	L	4	82
12	1	4	L	11	116
12	1	4	L	1	122
12	1	4	L	5	133
12	1	4	L	8	139
12	1	4	L	3	146
13	1	1	L	1	0
13	1	1	L	4	2
13	1	1	L	11	49
13	1	1	L	1	59
13	1	1	L	3	65
13	1	2	R	1	0
13	1	2	R	3	13
13	1	2	R	11	80
13	1	2	R	1	86
13	1	2	R	4	100
13	1	3	L	1	0
13	1	3	L	3	3
13	1	4	R	1	0
13	1	4	R	3	3
13	1	4	R	6	38
13	1	4	R	5	78
13	1	4	R	8	92
13	1	4	R	4	104
14	1	1	L	1	0
14	1	1	L	4	3
14	1	1	L	11	39
14	1	1	L	1	50
14	1	1	L	3	52
14	1	2	R	1	0
14	1	2	R	4	4
14	1	3	L	1	0
14	1	3	L	3	2
14	1	4	L	1	0
14	1	4	L	3	3
15	1	1	L	1	0
15	1	1	L	3	7
15	1	2	L	1	0
15	1	2	L	2	65
15	1	2	L	1	80
15	1	2	L	2	120
15	1	2	L	1	157
15	1	2	L	4	270
15	1	2	L	5	290
15	1	2	L	4	310
15	1	2	L	5	317
15	1	2	L	8	354
15	1	2	L	1	399
15	1	2	L	3	418
15	1	3	L	1	0
15	1	3	L	5	6
15	1	3	L	4	8
15	1	3	L	4	15
15	1	3	L	5	82
15	1	3	L	1	142
15	1	3	L	4	150
15	1	3	L	7	152
15	1	3	L	5	160
15	1	3	L	8	165
15	1	3	L	3	242
15	1	4	L	1	0
15	1	4	L	5	14
15	1	4	L	8	18
15	1	4	L	2	29
15	1	4	L	1	32
15	1	4	L	3	57
16	1	1	R	1	0
16	1	1	R	4	2
16	1	2	R	1	0
16	1	2	R	4	3
16	1	3	L	1	0
16	1	3	L	4	3
16	1	3	L	11	64
16	1	3	L	1	69
16	1	3	L	3	77
16	1	4	R	1	0
16	1	4	R	3	3
16	1	4	R	11	57
16	1	4	R	1	62
16	1	4	R	4	84
17	1	1	R	1	0
17	1	1	R	4	3
17	1	2	R	1	0
17	1	2	R	4	6
17	1	3	R	1	0
17	1	3	R	4	3
17	1	4	R	1	0
17	1	4	R	3	6
17	1	4	R	11	66
17	1	4	R	1	75
17	1	4	R	3	80
17	1	4	R	11	108
17	1	4	R	1	119
17	1	4	R	4	122
18	1	1	R	1	0
18	1	1	R	3	6
18	1	1	R	11	50
18	1	1	R	1	58
18	1	1	R	3	64
18	1	1	R	11	107
18	1	1	R	1	115
18	1	1	R	4	118
18	1	2	R	1	0
18	1	2	R	4	6
18	1	3	R	1	0
18	1	3	R	4	5
18	1	4	L	1	0
18	1	4	L	3	4
19	1	1	R	1	0
19	1	1	R	4	3
19	1	2	L	1	0
19	1	2	L	3	3
19	1	3	L	1	0
19	1	3	L	3	4
19	1	4	R	1	0
19	1	4	R	4	4
20	1	1	L	1	0
20	1	1	L	3	2
20	1	2	R	1	0
20	1	2	R	4	4
20	1	3	L	1	0
20	1	3	L	3	3
20	1	4	R	1	0
20	1	4	R	4	2
21	1	1	L	1	0
21	1	1	L	3	12
21	1	1	L	11	49
21	1	1	L	1	55
21	1	1	L	4	57
21	1	2	R	1	0
21	1	2	R	4	3
21	1	3	R	1	0
21	1	3	R	4	2
21	1	4	L	1	0
21	1	4	L	3	5
22	1	1	R	1	0
22	1	1	R	4	2
22	1	2	R	1	0
22	1	2	R	4	3
22	1	3	L	1	0
22	1	3	L	3	4
22	1	4	R	1	0
22	1	4	R	4	3
23	1	1	L	1	0
23	1	1	L	3	4
23	1	2	L	1	0
23	1	2	L	4	5
23	1	2	L	11	48
23	1	2	L	1	57
23	1	2	L	3	59
23	1	3	R	1	0
23	1	3	R	4	3
23	1	4	R	1	0
23	1	4	R	4	4
24	1	1	L	1	0
24	1	1	L	3	2
24	1	2	R	1	0
24	1	2	R	4	12
24	1	3	L	1	0
24	1	3	L	3	20
24	1	4	L	1	0
24	1	4	L	3	4
25	1	1	L	3	5
25	1	2	L	1	0
25	1	2	L	4	5
25	1	2	L	11	31
25	1	2	L	1	52
25	1	2	L	3	83
25	1	3	R	1	0
25	1	3	R	4	2
25	1	4	R	1	0
25	1	4	R	3	3
25	1	4	R	11	31
25	1	4	R	1	35
25	1	4	R	4	41
26	1	1	R	1	0
26	1	1	R	4	3
26	1	2	R	1	0
26	1	2	R	3	4
26	1	2	R	11	23
26	1	2	R	1	33
26	1	2	R	4	46
26	1	3	R	1	0
26	1	3	R	4	3
26	1	4	L	1	0
26	1	4	L	3	4
27	1	1	R	1	0
27	1	1	R	4	2
27	1	2	R	1	0
27	1	2	R	4	2
27	1	3	L	1	0
27	1	3	L	3	3
27	1	4	R	1	0
27	1	4	R	4	4
28	1	1	L	1	0
28	1	1	L	3	2
28	1	2	L	1	0
28	1	2	L	3	3
28	1	3	R	1	0
28	1	3	R	4	3
28	1	4	R	1	0
28	1	4	R	4	5
29	1	1	R	1	0
29	1	1	R	4	2
29	1	2	R	1	0
29	1	2	R	4	2
29	1	3	R	1	0
29	1	3	R	4	3
29	1	4	L	1	0
29	1	4	L	3	3
30	1	1	L	1	0
30	1	1	L	3	3
30	1	2	R	1	0
30	1	2	R	4	3
30	1	3	R	1	0
30	1	3	R	4	2
30	1	4	R	1	0
30	1	4	R	4	2
31	1	1	L	1	0
31	1	1	L	3	2
31	1	2	L	1	0
31	1	2	L	3	2
31	1	3	L	1	0
31	1	3	L	3	3
31	1	4	R	1	0
31	1	4	R	4	2
32	1	1	L	1	0
32	1	1	L	3	2
32	1	2	L	1	0
32	1	2	L	4	10
32	1	2	L	11	36
32	1	2	L	1	42
32	1	2	L	4	61
32	1	2	L	11	77
32	1	2	L	1	82
32	1	2	L	3	96
32	1	3	L	1	0
32	1	3	L	3	8
32	1	4	L	1	0
32	1	4	L	3	4
33	1	1	R	1	0
33	1	1	R	4	2
33	1	2	L	1	0
33	1	2	L	3	3
33	1	3	R	1	0
33	1	3	R	4	2
33	1	4	R	1	0
33	1	4	R	4	8
34	1	1	R	1	0
34	1	1	R	4	2
34	1	2	R	1	0
34	1	2	R	3	2
34	1	2	R	11	26
34	1	2	R	1	37
34	1	2	R	4	40
34	1	3	R	1	0
34	1	3	R	4	3
34	1	4	L	1	0
34	1	4	L	3	3
35	1	1	R	1	0
35	1	1	R	4	2
35	1	2	R	1	0
35	1	2	R	4	5
35	1	3	R	1	0
35	1	3	R	4	11
35	1	4	R	1	0
35	1	4	R	4	5
36	1	1	R	1	0
36	1	1	R	4	2
36	1	2	R	1	0
36	1	2	R	4	3
36	1	3	R	1	0
36	1	3	R	4	2
36	1	4	L	1	0
36	1	4	L	3	5
37	1	1	R	1	0
37	1	1	R	4	2
37	1	2	R	1	0
37	1	2	R	4	2
37	1	3	L	1	0
37	1	3	L	3	5
37	1	4	L	1	0
37	1	4	L	3	8
38	1	1	R	1	0
38	1	1	R	4	5
38	1	2	R	1	0
38	1	2	R	2	9
38	1	2	R	1	17
38	1	2	R	4	26
38	1	3	L	1	0
38	1	3	L	3	49
38	1	4	R	1	0
38	1	4	R	3	79
38	1	4	R	11	105
38	1	4	R	1	114
38	1	4	R	4	128
39	1	1	R	1	0
39	1	1	R	4	2
39	1	2	R	1	0
39	1	2	R	4	7
39	1	3	L	1	0
39	1	3	L	3	3
39	1	4	R	1	0
39	1	4	R	4	2
40	1	1	L	1	0
40	1	1	L	3	27
40	1	2	L	1	0
40	1	2	L	3	5
40	1	3	R	1	0
40	1	3	R	4	15
40	1	4	R	1	0
40	1	4	R	4	7
41	1	1	R	1	0
41	1	1	R	4	11
41	1	2	R	1	0
41	1	2	R	4	2
41	1	3	R	1	0
41	1	3	R	4	2
41	1	4	L	1	0
41	1	4	L	3	2
42	1	1	L	1	0
42	1	1	L	3	5
42	1	2	R	1	0
42	1	2	R	4	2
42	1	3	R	1	0
42	1	3	R	4	2
42	1	4	R	1	0
42	1	4	R	4	2
43	1	1	R	1	0
43	1	1	R	3	11
43	1	1	R	11	67
43	1	1	R	1	72
43	1	1	R	3	87
43	1	1	R	11	111
43	1	1	R	1	117
43	1	1	R	4	137
43	1	2	R	1	0
43	1	2	R	3	4
43	1	2	R	11	54
43	1	2	R	1	59
43	1	2	R	4	64
43	1	3	L	1	0
43	1	3	L	4	4
43	1	3	L	11	35
43	1	3	L	1	39
43	1	3	L	4	78
43	1	3	L	11	115
43	1	3	L	1	119
43	1	3	L	4	154
43	1	3	L	11	185
43	1	3	L	1	194
43	1	3	L	4	203
43	1	3	L	11	236
43	1	3	L	1	241
43	1	3	L	3	266
43	1	4	R	1	0
43	1	4	R	3	8
43	1	4	R	11	57
43	1	4	R	1	66
43	1	4	R	4	74
44	1	1	L	1	0
44	1	1	L	3	10
44	1	2	L	1	0
44	1	2	L	3	6
44	1	3	R	1	0
44	1	3	R	4	105
44	1	4	R	1	0
44	1	4	R	3	39
44	1	4	R	11	70
44	1	4	R	1	120
44	1	4	R	3	132
45	1	1	R	1	0
45	1	1	R	5	15
45	1	1	R	8	22
45	1	1	R	3	54
45	1	1	R	11	86
45	1	1	R	1	90
45	1	1	R	4	94
45	1	2	R	1	0
45	1	2	R	4	19
45	1	3	R	1	0
45	1	3	R	3	3
45	1	3	R	11	34
45	1	3	R	1	41
45	1	3	R	4	51
45	1	4	L	1	0
45	1	4	L	3	7
46	1	1	L	1	0
46	1	1	L	3	3
46	1	2	R	1	0
46	1	2	R	4	2
46	1	3	R	1	0
46	1	3	R	3	5
46	1	3	R	11	34
46	1	3	R	1	45
46	1	3	R	4	48
46	1	4	R	1	0
46	1	4	R	4	2
48	1	1	L	1	0
48	1	1	L	3	5
48	1	2	R	1	0
48	1	2	R	4	10
48	1	3	L	1	0
48	1	3	L	3	2
48	1	4	R	1	0
48	1	4	R	4	3
49	1	1	R	1	0
49	1	1	R	4	15
49	1	2	R	1	0
49	1	2	R	3	22
49	1	2	R	11	51
49	1	2	R	1	69
49	1	2	R	5	95
49	1	2	R	8	98
49	1	2	R	4	108
49	1	3	L	1	0
49	1	3	L	5	15
49	1	3	L	8	19
49	1	3	L	2	53
49	1	3	L	1	62
49	1	3	L	3	76
49	1	4	L	1	0
49	1	4	L	3	3
50	1	1	R	1	0
50	1	1	R	4	8
50	1	2	L	1	0
50	1	2	L	3	2
50	1	3	R	1	0
50	1	3	R	4	4
50	1	4	L	1	0
50	1	4	L	4	15
50	1	4	L	11	70
50	1	4	L	1	75
50	1	4	L	5	91
50	1	4	L	8	103
50	1	4	L	4	117
50	1	4	L	11	193
50	1	4	L	1	211
50	1	4	L	3	227
51	1	1	R	1	0
51	1	1	R	3	2
51	1	1	R	11	52
51	1	1	R	1	58
51	1	1	R	4	66
51	1	2	L	1	0
51	1	2	L	4	3
51	1	2	L	11	24
51	1	2	L	1	27
51	1	2	L	3	34
51	1	3	L	1	0
51	1	3	L	3	4
51	1	4	R	1	0
51	1	4	R	4	2
54	1	1	R	1	0
54	1	1	R	4	2
54	1	2	L	1	0
54	1	2	L	3	3
54	1	3	L	1	0
54	1	3	L	5	8
54	1	3	L	8	12
54	1	3	L	2	36
54	1	3	L	1	46
54	1	3	L	3	49
54	1	4	R	1	0
54	1	4	R	4	3
55	1	1	L	1	0
55	1	1	L	5	62
55	1	1	L	8	65
55	1	1	L	2	131
55	1	1	L	1	135
55	1	1	L	4	132
55	1	1	L	11	155
55	1	1	L	1	251
55	1	1	L	3	255
55	1	2	L	1	0
55	1	2	L	5	22
55	1	2	L	8	34
55	1	2	L	4	51
55	1	2	L	11	71
55	1	2	L	1	128
55	1	2	L	4	134
55	1	2	L	11	139
55	1	2	L	1	266
55	1	2	L	3	303
55	1	3	L	1	0
55	1	3	L	4	8
55	1	3	L	11	40
55	1	3	L	1	108
55	1	3	L	4	124
55	1	3	L	11	141
55	1	3	L	1	183
55	1	3	L	3	217
55	1	4	R	1	0
55	1	4	R	4	9
56	1	1	R	1	0
56	1	1	R	3	22
56	1	1	R	6	61
56	1	1	R	4	98
56	1	2	L	1	0
56	1	2	L	3	27
56	1	3	L	1	0
56	1	3	L	5	51
56	1	3	L	8	56
56	1	3	L	3	113
56	1	4	R	1	0
56	1	4	R	4	9
57	1	1	R	1	0
57	1	1	R	4	8
57	1	2	L	1	0
57	1	2	L	4	7
57	1	2	L	11	42
57	1	2	L	1	51
57	1	2	L	3	56
57	1	3	R	1	0
57	1	3	R	4	8
57	1	4	R	1	0
57	1	4	R	4	7
58	1	1	R	1	0
58	1	1	R	3	4
58	1	1	R	11	36
58	1	1	R	1	43
58	1	1	R	4	67
58	1	2	L	1	0
58	1	2	L	3	2
58	1	3	L	1	0
58	1	3	L	5	15
58	1	3	L	8	19
58	1	3	L	4	27
58	1	3	L	11	63
58	1	3	L	1	71
58	1	3	L	3	118
58	1	4	R	1	0
58	1	4	R	4	2
59	1	1	L	1	0
59	1	1	L	3	2
59	1	2	R	1	0
59	1	2	R	4	2
59	1	3	L	1	0
59	1	3	L	3	4
59	1	4	L	1	0
59	1	4	L	3	3
60	1	1	L	1	0
60	1	1	L	3	2
60	1	2	R	1	0
60	1	2	R	4	3
60	1	3	R	1	0
60	1	3	R	4	5
60	1	4	L	1	0
60	1	4	L	3	2
61	1	1	R	1	0
61	1	1	R	4	2
61	1	2	R	1	0
61	1	2	R	5	5
61	1	2	R	8	9
61	1	2	R	4	16
61	1	3	L	1	0
61	1	3	L	4	2
61	1	3	L	11	42
61	1	3	L	1	47
61	1	3	L	5	59
61	1	3	L	8	64
61	1	3	L	3	68
61	1	4	R	1	0
61	1	4	R	4	3
62	1	1	R	1	0
62	1	1	R	4	2
62	1	2	R	1	0
62	1	2	R	4	3
62	1	3	L	1	0
62	1	3	L	5	11
62	1	3	L	8	19
62	1	3	L	4	31
62	1	3	L	11	68
62	1	3	L	1	76
62	1	3	L	3	82
62	1	4	R	1	0
62	1	4	R	3	17
62	1	4	R	11	43
62	1	4	R	1	56
62	1	4	R	4	60
63	1	1	L	1	0
63	1	1	L	5	6
63	1	1	L	8	11
63	1	1	L	4	28
63	1	1	L	11	72
63	1	1	L	1	76
63	1	1	L	3	81
63	1	2	L	1	0
63	1	2	L	4	11
63	1	2	L	11	48
63	1	2	L	1	56
63	1	2	L	4	62
63	1	2	L	7	98
63	1	2	L	5	104
63	1	2	L	8	126
63	1	2	L	3	143
63	1	3	R	1	0
63	1	3	R	4	8
63	1	4	R	1	0
63	1	4	R	4	5
65	1	1	L	1	0
65	1	1	L	3	3
65	1	2	R	1	0
65	1	2	R	4	3
65	1	3	L	1	0
65	1	3	L	3	5
65	1	4	R	1	0
65	1	4	R	3	7
65	1	4	R	6	23
65	1	4	R	2	43
65	1	4	R	1	49
65	1	4	R	4	51
66	1	1	L	1	0
66	1	1	L	3	4
66	1	2	L	1	0
66	1	2	L	3	7
66	1	3	R	1	0
66	1	3	R	4	3
66	1	4	L	1	0
66	1	4	L	3	3
67	1	1	L	1	0
67	1	1	L	3	3
67	1	2	L	1	0
67	1	2	L	3	4
67	1	3	R	1	0
67	1	3	R	4	13
67	1	4	L	1	0
67	1	4	L	3	3
68	1	1	L	1	0
68	1	1	L	3	3
68	1	2	R	1	0
68	1	2	R	3	4
68	1	2	R	6	11
68	1	2	R	4	19
68	1	3	L	1	0
68	1	3	L	4	3
68	1	3	L	7	34
68	1	3	L	5	43
68	1	3	L	8	47
68	1	3	L	3	62
68	1	4	R	1	0
68	1	4	R	4	3
69	1	1	R	1	0
69	1	1	R	3	5
69	1	1	R	11	39
69	1	1	R	1	45
69	1	1	R	4	51
69	1	2	L	1	0
69	1	2	L	3	3
69	1	3	R	1	0
69	1	3	R	3	9
69	1	3	R	11	57
69	1	3	R	1	63
69	1	3	R	3	67
69	1	3	R	11	99
69	1	3	R	1	104
69	1	3	R	4	109
69	1	4	R	1	0
69	1	4	R	4	4
70	1	1	L	1	0
70	1	1	L	3	4
70	1	2	R	1	0
70	1	2	R	4	3
70	1	3	L	1	0
70	1	3	L	3	3
70	1	4	L	1	0
70	1	4	L	5	7
70	1	4	L	8	11
70	1	4	L	3	33
71	1	1	R	1	0
71	1	1	R	4	3
71	1	2	L	1	0
71	1	2	L	3	3
71	1	3	R	1	0
71	1	3	R	4	4
71	1	4	R	1	0
71	1	4	R	4	3
73	1	1	L	1	0
73	1	1	L	3	3
73	1	2	R	1	0
73	1	2	R	3	3
73	1	2	R	6	48
73	1	2	R	4	79
73	1	3	R	1	0
73	1	3	R	4	5
73	1	4	L	1	0
73	1	4	L	3	3
74	1	1	R	1	0
74	1	1	R	3	4
74	1	1	R	11	39
74	1	1	R	1	47
74	1	1	R	4	63
74	1	2	L	1	0
74	1	2	L	3	4
74	1	3	R	1	0
74	1	3	R	4	3
74	1	4	L	1	0
74	1	4	L	3	3
75	1	1	R	1	0
75	1	1	R	4	3
75	1	2	L	1	0
75	1	2	L	4	4
75	1	2	L	11	48
75	1	2	L	1	56
75	1	2	L	3	60
75	1	3	L	1	0
75	1	3	L	4	3
75	1	3	L	11	67
75	1	3	L	1	79
75	1	3	L	3	83
75	1	4	R	1	0
75	1	4	R	4	3
76	1	1	L	1	0
76	1	1	L	3	3
76	1	2	R	1	0
76	1	2	R	4	4
76	1	3	L	1	0
76	1	3	L	3	3
76	1	4	L	1	0
76	1	4	L	4	6
76	1	4	L	11	45
76	1	4	L	1	51
76	1	4	L	3	54
77	1	1	R	1	0
77	1	1	R	4	3
77	1	2	L	1	0
77	1	2	L	3	8
77	1	3	R	1	0
77	1	3	R	3	4
77	1	3	R	11	54
77	1	3	R	1	62
77	1	3	R	4	66
77	1	4	R	1	0
77	1	4	R	4	4
78	1	1	L	1	0
78	1	1	L	3	3
78	1	2	L	1	0
78	1	2	L	4	6
78	1	2	L	11	132
78	1	2	L	1	144
78	1	2	L	5	165
78	1	2	L	8	171
78	1	2	L	3	179
78	1	3	R	1	0
78	1	3	R	3	5
78	1	3	R	11	48
78	1	3	R	1	54
78	1	3	R	4	59
78	1	4	L	1	0
78	1	4	L	4	4
78	1	4	L	11	36
78	1	4	L	1	40
78	1	4	L	3	44
79	1	1	L	1	0
79	1	1	L	4	5
79	1	1	L	11	43
79	1	1	L	1	51
79	1	1	L	3	55
79	1	2	L	1	0
79	1	2	L	3	3
79	1	3	L	1	0
79	1	3	L	4	3
79	1	3	L	11	39
79	1	3	L	1	45
79	1	3	L	3	48
79	1	4	L	1	0
79	1	4	L	3	3
80	1	1	L	1	0
80	1	1	L	3	4
80	1	2	R	1	0
80	1	2	R	3	4
80	1	2	R	11	41
80	1	2	R	1	48
80	1	2	R	4	57
80	1	3	R	1	0
80	1	3	R	4	4
80	1	4	L	1	0
80	1	4	L	3	3
81	1	1	R	1	0
81	1	1	R	4	3
81	1	2	R	1	0
81	1	2	R	4	3
81	1	3	R	1	0
81	1	3	R	4	4
81	1	4	R	1	0
81	1	4	R	3	3
81	1	4	R	11	47
81	1	4	R	1	52
81	1	4	R	4	56
82	1	1	R	1	0
82	1	1	R	4	4
82	1	2	R	1	0
82	1	2	R	5	19
82	1	2	R	8	24
82	1	2	R	4	56
82	1	3	R	1	0
82	1	3	R	4	3
82	1	4	L	1	0
82	1	4	L	2	21
82	1	4	L	1	26
82	1	4	L	3	34
83	1	1	L	1	0
83	1	1	L	4	4
83	1	1	L	11	49
83	1	1	L	1	55
83	1	1	L	3	61
83	1	2	L	1	0
83	1	2	L	3	4
83	1	3	L	1	0
83	1	3	L	3	6
83	1	4	R	1	0
83	1	4	R	4	5
84	1	1	R	1	0
84	1	1	R	3	4
84	1	1	R	11	39
84	1	1	R	1	46
84	1	1	R	4	49
84	1	2	L	1	0
84	1	2	L	3	5
84	1	3	L	1	0
84	1	3	L	3	3
84	1	4	R	1	0
84	1	4	R	4	4
85	1	1	R	1	0
85	1	1	R	4	5
85	1	2	R	1	0
85	1	2	R	4	4
85	1	3	R	1	0
85	1	3	R	4	3
85	1	4	R	1	0
85	1	4	R	4	7
86	1	1	L	1	0
86	1	1	L	3	3
86	1	2	R	1	0
86	1	2	R	4	5
86	1	3	R	1	0
86	1	3	R	4	4
86	1	4	L	1	0
86	1	4	L	3	4
87	1	1	R	1	0
87	1	1	R	4	3
87	1	2	L	1	0
87	1	2	L	3	3
87	1	3	R	1	0
87	1	3	R	4	4
87	1	4	R	1	0
87	1	4	R	4	3
88	1	1	L	1	0
88	1	1	L	3	3
88	1	2	L	1	0
88	1	2	L	3	4
88	1	3	R	1	0
88	1	3	R	4	3
88	1	4	L	1	0
88	1	4	L	3	4
89	1	1	L	1	0
89	1	1	L	3	5
89	1	2	L	1	0
89	1	2	L	3	7
89	1	3	R	1	0
89	1	3	R	4	6
89	1	4	R	1	0
89	1	4	R	4	4
90	1	1	R	1	0
90	1	1	R	4	5
90	1	2	L	1	0
90	1	2	L	3	4
90	1	3	L	1	0
90	1	3	L	3	3
90	1	4	R	1	0
90	1	4	R	4	4
91	1	1	L	1	0
91	1	1	L	3	5
91	1	2	L	1	0
91	1	2	L	3	9
91	1	3	R	1	0
91	1	3	R	4	4
91	1	4	R	1	0
91	1	4	R	4	11
92	1	1	L	1	0
92	1	1	L	4	13
92	1	1	L	11	57
92	1	1	L	1	63
92	1	1	L	3	68
92	1	2	L	1	0
92	1	2	L	3	4
92	1	3	R	1	0
92	1	3	R	4	4
92	1	4	L	1	0
92	1	4	L	3	5
94	1	1	L	1	0
94	1	1	L	3	4
94	1	2	L	1	0
94	1	2	L	3	5
94	1	3	R	1	0
94	1	3	R	4	4
94	1	4	L	1	0
94	1	4	L	3	4
95	1	1	L	1	0
95	1	1	L	2	12
95	1	1	L	1	16
95	1	1	L	3	22
95	1	2	R	1	0
95	1	2	R	5	9
95	1	2	R	8	13
95	1	2	R	4	17
95	1	3	L	1	0
95	1	3	L	3	5
95	1	4	R	1	0
95	1	4	R	4	4
1	2	1	L	1	0
1	2	1	L	3	21
1	2	2	L	1	0
1	2	2	L	11	35
1	2	2	L	1	132
1	2	2	L	3	285
1	2	3	L	1	0
1	2	3	L	3	24
2	2	1	L	1	0
2	2	1	L	5	9
2	2	1	L	8	21
2	2	1	L	4	103
2	2	1	L	7	116
2	2	1	L	4	208
2	2	1	L	7	294
2	2	1	L	5	315
2	2	1	L	8	321
2	2	1	L	3	341
2	2	2	R	1	0
2	2	2	R	5	4
2	2	2	R	4	9
2	2	3	L	1	0
2	2	3	L	4	5
2	2	3	L	7	38
2	2	3	L	10	69
2	2	3	L	1	115
2	2	3	L	3	132
2	2	4	L	1	0
2	2	4	L	4	4
2	2	4	L	11	30
2	2	4	L	1	73
2	2	4	L	4	77
2	2	4	L	7	92
2	2	4	L	3	128
3	2	1	R	1	0
3	2	1	R	4	12
3	2	2	R	1	0
3	2	2	R	4	7
3	2	3	R	1	0
3	2	3	R	3	43
3	2	3	R	11	75
3	2	3	R	1	160
3	2	3	R	3	214
3	2	3	R	7	248
3	2	3	R	5	269
3	2	3	R	8	285
3	2	3	R	4	307
3	2	4	L	1	0
3	2	4	L	4	5
3	2	4	L	11	56
3	2	4	L	1	204
3	2	4	L	3	276
4	2	1	L	1	0
4	2	1	L	5	19
4	2	1	L	8	22
4	2	1	L	3	32
4	2	2	L	1	0
4	2	2	L	2	45
4	2	2	L	1	71
4	2	2	L	3	97
4	2	3	L	1	0
4	2	3	L	2	31
4	2	3	L	1	48
4	2	3	L	3	76
4	2	4	L	1	0
4	2	4	L	2	33
4	2	4	L	1	68
4	2	4	L	3	84
6	2	1	R	1	0
6	2	1	R	9	31
6	2	1	R	4	35
6	2	2	L	1	0
6	2	2	L	3	11
6	2	3	R	1	0
6	2	3	R	9	16
6	2	3	R	4	23
6	2	4	L	1	0
6	2	4	L	3	5
7	2	1	R	1	0
7	2	1	R	3	4
7	2	1	R	11	28
7	2	1	R	1	34
7	2	1	R	3	52
7	2	1	R	11	113
7	2	1	R	1	131
7	2	1	R	4	134
7	2	2	L	1	0
7	2	2	L	4	4
7	2	2	L	11	20
7	2	2	L	1	35
7	2	2	L	4	39
7	2	2	L	11	54
7	2	2	L	1	58
7	2	2	L	5	135
7	2	2	L	8	144
7	2	2	L	4	175
7	2	2	L	11	215
7	2	2	L	1	229
7	2	2	L	3	259
7	2	3	L	1	0
7	2	3	L	4	11
7	2	3	L	11	22
7	2	3	L	1	28
7	2	3	L	4	41
7	2	3	L	11	47
7	2	3	L	1	51
7	2	3	L	3	64
7	2	4	R	1	0
7	2	4	R	3	13
7	2	4	R	11	65
7	2	4	R	1	70
7	2	4	R	5	88
7	2	4	R	8	93
7	2	4	R	4	181
8	2	1	L	1	0
8	2	1	L	4	47
8	2	1	L	11	115
8	2	1	L	1	124
8	2	1	L	3	159
8	2	2	R	1	0
8	2	2	R	3	25
8	2	2	R	11	76
8	2	2	R	1	86
8	2	2	R	4	94
8	2	3	R	1	0
8	2	3	R	9	13
8	2	3	R	2	35
8	2	3	R	1	43
8	2	3	R	3	63
8	2	3	R	11	135
8	2	3	R	1	138
8	2	3	R	4	143
8	2	4	L	1	0
8	2	4	L	3	9
9	2	1	L	1	0
9	2	1	L	3	6
9	2	2	L	1	0
9	2	2	L	3	6
9	2	3	R	1	0
9	2	3	R	4	17
9	2	4	L	1	0
9	2	4	L	3	7
10	2	1	L	1	0
10	2	1	L	3	18
10	2	2	R	1	0
10	2	2	R	3	14
10	2	2	R	11	45
10	2	2	R	1	161
10	2	2	R	4	166
10	2	3	L	1	0
10	2	3	L	3	91
10	2	4	L	1	0
10	2	4	L	4	4
10	2	4	L	11	28
10	2	4	L	1	91
10	2	4	L	3	167
10	2	4	L	5	171
10	2	4	L	3	222
10	2	4	L	5	225
10	2	4	L	3	259
11	2	1	R	1	0
11	2	1	R	4	17
11	2	2	R	1	0
11	2	2	R	4	6
11	2	3	R	1	0
11	2	3	R	3	36
11	2	3	R	11	131
11	2	3	R	1	137
11	2	3	R	9	141
11	2	3	R	5	166
11	2	3	R	8	176
11	2	3	R	3	208
11	2	3	R	11	240
11	2	3	R	1	246
11	2	3	R	9	248
11	2	3	R	3	277
11	2	3	R	11	322
11	2	3	R	1	339
11	2	3	R	9	343
11	2	3	R	5	363
11	2	3	R	8	375
11	2	3	R	4	394
11	2	4	R	1	0
11	2	4	R	9	4
11	2	4	R	2	34
11	2	4	R	1	47
11	2	4	R	4	71
12	2	1	L	1	0
12	2	1	L	4	22
12	2	1	L	11	88
12	2	1	L	1	96
12	2	1	L	3	121
12	2	2	L	1	0
12	2	2	L	4	42
12	2	2	L	11	95
12	2	2	L	1	103
12	2	2	L	3	124
12	2	3	R	1	0
12	2	3	R	4	3
12	2	4	R	1	0
12	2	4	R	9	4
12	2	4	R	4	14
13	2	1	L	1	0
13	2	1	L	4	3
13	2	1	L	7	13
13	2	1	L	5	16
13	2	1	L	8	18
13	2	1	L	3	60
13	2	2	R	1	0
13	2	2	R	5	12
13	2	2	R	8	16
13	2	2	R	4	40
13	2	3	L	1	0
13	2	3	L	4	27
13	2	3	L	11	85
13	2	3	L	1	99
13	2	3	L	4	105
13	2	3	L	7	108
13	2	3	L	9	117
13	2	3	L	5	122
13	2	3	L	8	124
13	2	3	L	3	135
13	2	4	L	1	0
13	2	4	L	5	8
13	2	4	L	8	9
13	2	4	L	4	28
13	2	4	L	11	73
13	2	4	L	1	80
13	2	4	L	5	95
13	2	4	L	8	114
13	2	4	L	4	127
13	2	4	L	7	138
13	2	4	L	9	143
13	2	4	L	3	195
14	2	1	L	1	0
14	2	1	L	4	3
14	2	1	L	7	15
14	2	1	L	2	22
14	2	1	L	1	37
14	2	1	L	4	56
14	2	1	L	11	93
14	2	1	L	1	104
14	2	1	L	9	105
14	2	1	L	4	127
14	2	1	L	11	175
14	2	1	L	1	186
14	2	1	L	9	190
14	2	1	L	3	201
14	2	2	R	1	0
14	2	2	R	4	9
14	2	3	L	1	0
14	2	3	L	9	7
14	2	3	L	3	9
14	2	4	R	1	0
14	2	4	R	9	2
14	2	4	R	4	11
15	2	1	R	1	0
15	2	1	R	4	5
15	2	2	R	1	0
15	2	2	R	4	4
15	2	3	R	1	0
15	2	3	R	4	6
15	2	4	R	1	0
15	2	4	R	9	4
15	2	4	R	5	28
15	2	4	R	8	42
15	2	4	R	3	94
15	2	4	R	11	132
15	2	4	R	1	141
15	2	4	R	9	144
15	2	4	R	3	179
15	2	4	R	11	186
15	2	4	R	1	193
15	2	4	R	9	195
15	2	4	R	4	270
16	2	1	L	1	0
16	2	1	L	3	3
16	2	2	R	1	0
16	2	2	R	3	5
16	2	2	R	11	39
16	2	2	R	1	48
16	2	2	R	4	66
16	2	3	L	1	0
16	2	3	L	3	3
16	2	4	R	1	0
16	2	4	R	3	5
16	2	4	R	11	42
16	2	4	R	1	47
16	2	4	R	4	53
17	2	1	L	1	0
17	2	1	L	3	18
17	2	2	R	1	0
17	2	2	R	3	11
17	2	2	R	6	18
17	2	2	R	2	21
17	2	2	R	1	38
17	2	2	R	9	41
17	2	2	R	3	64
17	2	2	R	6	72
17	2	2	R	2	81
17	2	2	R	1	99
17	2	2	R	9	110
17	2	2	R	3	137
17	2	2	R	11	184
17	2	2	R	1	194
17	2	2	R	4	205
17	2	3	R	1	0
17	2	3	R	4	7
17	2	4	R	1	0
17	2	4	R	4	5
18	2	1	L	1	0
18	2	1	L	3	14
18	2	2	R	1	0
18	2	2	R	3	5
18	2	2	R	11	41
18	2	2	R	1	43
18	2	2	R	4	48
18	2	3	L	1	0
18	2	3	L	4	12
18	2	3	L	11	34
18	2	3	L	1	44
18	2	3	L	3	53
18	2	3	R	1	0
18	2	4	R	4	6
19	2	1	R	1	0
19	2	1	R	4	8
19	2	2	R	1	0
19	2	2	R	3	10
19	2	2	R	11	48
19	2	2	R	1	60
19	2	2	R	4	72
19	2	3	R	1	0
19	2	3	R	4	7
19	2	4	L	1	0
19	2	4	L	4	4
19	2	4	L	11	46
19	2	4	L	1	55
19	2	4	L	9	73
19	2	4	L	4	102
19	2	4	L	11	137
19	2	4	L	1	151
19	2	4	L	3	155
20	2	1	R	1	0
20	2	1	R	4	3
20	2	2	R	1	0
20	2	2	R	4	18
20	2	3	R	1	0
20	2	3	R	4	6
20	2	4	L	1	0
20	2	4	L	3	6
21	2	1	L	1	0
21	2	1	L	5	20
21	2	1	L	8	24
21	2	1	L	11	98
21	2	1	L	1	103
21	2	1	L	3	140
21	2	2	L	1	0
21	2	2	L	3	4
21	2	3	R	1	0
21	2	3	R	4	3
21	2	4	L	1	0
21	2	4	L	3	6
22	2	1	L	1	0
22	2	1	L	3	7
22	2	2	R	1	0
22	2	2	R	9	11
22	2	2	R	4	37
22	2	3	L	1	0
22	2	3	L	4	33
22	2	3	L	11	54
22	2	3	L	1	58
22	2	3	L	3	64
22	2	4	R	1	0
22	2	4	R	4	3
23	2	1	L	1	0
23	2	1	L	3	4
23	2	2	L	1	0
23	2	2	L	3	3
23	2	3	R	1	0
23	2	3	R	4	2
23	2	4	R	1	0
23	2	4	R	4	4
24	2	1	L	1	0
24	2	1	L	3	4
24	2	2	R	1	0
24	2	2	R	4	4
24	2	3	L	1	0
24	2	3	L	3	4
24	2	4	L	1	0
24	2	4	L	3	2
25	2	1	L	1	0
25	2	1	L	9	4
25	2	1	L	3	36
25	2	2	L	1	0
25	2	2	L	4	34
25	2	2	L	11	91
25	2	2	L	1	97
25	2	2	L	3	146
25	2	3	R	1	0
25	2	3	R	4	36
25	2	4	R	1	0
25	2	4	R	4	2
26	2	1	L	1	0
26	2	1	L	3	3
26	2	2	R	1	0
26	2	2	R	4	4
26	2	3	R	1	0
26	2	3	R	4	4
26	2	4	L	1	0
26	2	4	L	3	3
27	2	1	L	1	0
27	2	1	L	3	4
27	2	2	R	1	0
27	2	2	R	4	3
27	2	3	L	1	0
27	2	3	L	3	3
27	2	4	L	1	0
27	2	4	L	3	22
28	2	1	L	1	0
28	2	1	L	9	2
28	2	1	L	5	19
28	2	1	L	8	27
28	2	1	L	3	47
28	2	2	L	1	0
28	2	2	L	3	5
28	2	3	R	1	0
28	2	3	R	4	10
28	2	4	R	1	0
28	2	4	R	9	4
28	2	4	R	3	17
28	2	4	R	11	37
28	2	4	R	1	48
28	2	4	R	4	57
29	2	1	L	1	0
29	2	1	L	3	3
29	2	2	R	1	0
29	2	2	R	4	5
29	2	3	R	1	0
29	2	3	R	4	4
29	2	4	L	1	0
29	2	4	L	3	4
30	2	1	L	1	0
30	2	1	L	3	3
30	2	2	L	1	0
30	2	2	L	3	4
30	2	3	R	1	0
30	2	3	R	4	6
30	2	4	R	1	0
30	2	4	R	4	5
31	2	1	L	1	0
31	2	1	L	3	15
31	2	2	L	1	0
31	2	2	L	3	6
31	2	3	R	1	0
31	2	3	R	4	6
31	2	4	L	1	0
31	2	4	L	3	14
32	2	1	R	1	0
32	2	1	R	4	2
32	2	2	L	1	0
32	2	2	L	3	5
32	2	3	L	1	0
32	2	3	L	3	8
32	2	4	L	1	0
32	2	4	L	3	2
33	2	1	R	1	0
33	2	1	R	4	5
33	2	2	R	1	0
33	2	2	R	4	3
33	2	3	L	1	0
33	2	3	L	3	3
33	2	4	R	1	0
33	2	4	R	4	2
34	2	1	R	1	0
34	2	1	R	4	5
34	2	2	L	1	0
34	2	2	L	3	3
34	2	3	L	1	0
34	2	3	L	3	5
34	2	4	L	1	0
34	2	4	L	9	3
34	2	4	L	3	24
35	2	1	L	1	0
35	2	1	L	3	10
35	2	2	L	1	0
35	2	2	L	3	3
35	2	3	L	1	0
35	2	3	L	3	13
35	2	4	R	1	0
35	2	4	R	9	3
35	2	4	R	5	14
35	2	4	R	8	23
35	2	4	R	3	81
35	2	4	R	11	95
35	2	4	R	1	99
35	2	4	R	4	139
36	2	1	L	1	0
36	2	1	L	3	11
36	2	2	R	1	0
36	2	2	R	4	8
36	2	3	L	1	0
36	2	3	L	3	5
36	2	4	L	1	0
36	2	4	L	3	3
37	2	1	L	1	0
37	2	1	L	3	11
37	2	2	L	1	0
37	2	2	L	9	1
37	2	2	L	2	6
37	2	2	L	1	25
37	2	2	L	3	47
37	2	3	L	1	0
37	2	3	L	9	3
37	2	3	L	3	36
37	2	4	R	1	0
37	2	4	R	4	3
38	2	1	L	1	0
38	2	1	L	3	29
38	2	2	L	1	0
38	2	2	L	9	3
38	2	2	L	2	36
38	2	2	L	1	46
38	2	2	L	3	94
38	2	3	L	1	0
38	2	3	L	3	28
38	2	4	R	1	0
38	2	4	R	4	6
39	2	1	L	1	0
39	2	1	L	3	2
39	2	2	R	1	0
39	2	2	R	4	5
39	2	3	L	1	0
39	2	3	L	3	2
39	2	4	L	1	0
39	2	4	L	3	3
40	2	1	L	1	0
40	2	1	L	3	3
40	2	2	L	1	0
40	2	2	L	3	17
40	2	3	R	1	0
40	2	3	R	4	36
40	2	4	R	1	0
40	2	4	R	4	6
41	2	1	L	1	0
41	2	1	L	3	4
41	2	2	R	1	0
41	2	2	R	4	23
41	2	3	R	1	0
41	2	3	R	4	5
41	2	4	L	1	0
41	2	4	L	3	5
42	2	1	L	1	0
42	2	1	L	3	5
42	2	2	L	1	0
42	2	2	L	3	5
42	2	3	R	1	0
42	2	3	R	4	3
42	2	4	R	1	0
42	2	4	R	4	4
43	2	1	L	1	0
43	2	1	L	4	18
43	2	1	L	11	53
43	2	1	L	1	51
43	2	1	L	4	72
43	2	1	L	11	103
43	2	1	L	1	112
43	2	1	L	4	115
43	2	1	L	11	131
43	2	1	L	1	136
43	2	1	L	3	163
43	2	2	R	1	0
43	2	2	R	3	4
43	2	2	R	11	43
43	2	2	R	1	47
43	2	2	R	3	108
43	2	2	R	11	131
43	2	2	R	1	136
43	2	2	R	4	146
43	2	3	L	1	0
43	2	3	L	4	6
43	2	3	L	11	29
43	2	3	L	1	36
43	2	3	L	4	41
43	2	3	L	11	80
43	2	3	L	1	87
43	2	3	L	4	114
43	2	3	L	11	131
43	2	3	L	1	137
43	2	3	L	4	175
43	2	3	L	11	224
43	2	3	L	1	228
43	2	3	L	3	235
43	2	4	L	1	0
43	2	4	L	3	21
44	2	1	L	1	0
44	2	1	L	4	2
44	2	1	L	11	64
44	2	1	L	1	69
44	2	1	L	4	74
44	2	1	L	11	102
44	2	1	L	1	108
44	2	1	L	3	111
44	2	2	L	1	0
44	2	2	L	3	2
44	2	3	R	1	0
44	2	3	R	4	4
44	2	4	R	1	0
44	2	4	R	3	7
44	2	4	R	11	27
44	2	4	R	1	29
44	2	4	R	4	38
45	2	1	L	1	0
45	2	1	L	4	10
45	2	1	L	11	66
45	2	1	L	1	73
45	2	1	L	3	77
45	2	2	R	1	0
45	2	2	R	3	3
45	2	2	R	11	63
45	2	2	R	1	71
45	2	2	R	4	84
45	2	3	R	1	0
45	2	3	R	4	14
45	2	4	L	1	0
45	2	4	L	3	3
46	2	1	L	1	0
46	2	1	L	3	22
46	2	2	L	1	0
46	2	2	L	3	2
46	2	3	R	1	0
46	2	3	R	4	5
46	2	4	R	1	0
46	2	4	R	4	5
48	2	1	R	1	0
48	2	1	R	3	33
48	2	1	R	11	49
48	2	1	R	1	61
48	2	1	R	4	63
48	2	2	L	1	0
48	2	2	L	3	5
48	2	3	L	1	0
48	2	3	L	4	5
48	2	3	L	11	34
48	2	3	L	1	39
48	2	3	L	3	45
48	2	4	L	1	0
48	2	4	L	3	2
49	2	1	L	1	0
49	2	1	L	5	10
49	2	1	L	8	17
49	2	1	L	4	49
49	2	1	L	11	82
49	2	1	L	1	90
49	2	1	L	3	101
49	2	2	L	1	0
49	2	2	L	3	15
49	2	3	R	1	0
49	2	3	R	4	2
49	2	4	L	1	0
49	2	4	L	3	6
50	2	1	L	1	0
50	2	1	L	5	15
50	2	1	L	8	17
50	2	1	L	4	33
50	2	1	L	11	64
50	2	1	L	1	74
50	2	1	L	3	78
50	2	2	L	1	0
50	2	2	L	5	22
50	2	2	L	8	29
50	2	2	L	4	41
50	2	2	L	11	82
50	2	2	L	1	85
50	2	2	L	3	130
50	2	3	R	1	0
50	2	3	R	5	9
50	2	3	R	8	12
50	2	3	R	3	22
50	2	3	R	11	50
50	2	3	R	1	55
50	2	3	R	4	59
50	2	4	R	1	0
50	2	4	R	4	4
51	2	1	L	1	0
51	2	1	L	4	15
51	2	1	L	11	54
51	2	1	L	1	60
51	2	1	L	5	82
51	2	1	L	8	87
51	2	1	L	4	102
51	2	1	L	11	118
51	2	1	L	1	123
51	2	1	L	3	133
51	2	2	R	1	0
51	2	2	R	4	5
51	2	3	L	1	0
51	2	3	L	5	10
51	2	3	L	8	24
51	2	3	L	4	74
51	2	3	L	11	93
51	2	3	L	1	100
51	2	3	L	3	108
51	2	4	R	1	0
51	2	4	R	4	3
52	2	1	R	1	0
52	2	1	R	4	4
52	2	2	R	1	0
52	2	2	R	4	9
52	2	3	L	1	0
52	2	3	L	3	3
52	2	4	R	1	0
52	2	4	R	4	12
53	2	1	L	1	0
53	2	1	L	4	44
53	2	1	L	11	92
53	2	1	L	1	99
53	2	1	L	3	103
53	2	2	R	1	0
53	2	2	R	4	2
53	2	3	R	1	0
53	2	3	R	4	5
53	2	4	L	1	0
53	2	4	L	3	3
55	2	1	R	1	0
55	2	1	R	5	33
55	2	1	R	8	55
55	2	1	R	3	141
55	2	1	R	6	222
55	2	1	R	4	287
55	2	2	L	1	0
55	2	2	L	4	103
55	2	2	L	11	198
55	2	2	L	1	288
55	2	2	L	4	286
55	2	2	L	7	325
55	2	2	L	5	331
55	2	2	L	8	336
55	2	2	L	3	365
55	2	3	L	1	0
55	2	3	L	4	44
55	2	3	L	7	59
55	2	3	L	3	79
55	2	4	L	1	0
55	2	4	L	5	10
55	2	4	L	8	14
55	2	4	L	4	18
55	2	4	L	7	101
55	2	4	L	3	115
57	2	1	L	1	0
57	2	1	L	3	39
57	2	2	L	1	0
57	2	2	L	3	21
57	2	3	L	1	0
57	2	3	L	3	19
57	2	4	R	1	0
57	2	4	R	3	17
57	2	4	R	11	67
57	2	4	R	1	165
57	2	4	R	4	185
58	2	1	L	1	0
58	2	1	L	3	5
58	2	2	R	1	0
58	2	2	R	5	18
58	2	2	R	8	29
58	2	2	R	4	62
58	2	3	L	1	0
58	2	3	L	3	3
58	2	4	L	1	0
58	2	4	L	4	3
58	2	4	L	11	44
58	2	4	L	1	60
58	2	4	L	3	74
59	2	1	L	1	0
59	2	1	L	3	4
59	2	2	R	1	0
59	2	2	R	4	2
59	2	3	L	1	0
59	2	3	L	4	3
59	2	3	L	11	52
59	2	3	L	1	57
59	2	3	L	3	67
59	2	4	L	1	0
59	2	4	L	3	3
60	2	1	R	1	0
60	2	1	R	4	16
60	2	2	L	1	0
60	2	2	L	3	3
60	2	3	R	1	0
60	2	3	R	4	4
60	2	4	L	1	0
60	2	4	L	3	3
61	2	1	R	1	0
61	2	1	R	3	9
61	2	1	R	11	68
61	2	1	R	1	75
61	2	1	R	4	88
61	2	2	L	1	0
61	2	2	L	3	11
61	2	3	L	1	0
61	2	3	L	5	18
61	2	3	L	8	27
61	2	3	L	4	44
61	2	3	L	11	88
61	2	3	L	1	96
61	2	3	L	3	109
61	2	4	L	1	0
61	2	4	L	3	8
62	2	1	L	1	0
62	2	1	L	3	5
62	2	2	R	1	0
62	2	2	R	3	3
62	2	2	R	11	46
62	2	2	R	1	54
62	2	2	R	4	58
62	2	3	L	1	0
62	2	3	L	5	13
62	2	3	L	8	27
62	2	3	L	4	44
62	2	3	L	11	78
62	2	3	L	1	85
62	2	3	L	3	96
62	2	4	L	1	0
62	2	4	L	3	6
63	2	1	L	1	0
63	2	1	L	5	8
63	2	1	L	8	21
63	2	1	L	4	29
63	2	1	L	11	68
63	2	1	L	1	73
63	2	1	L	3	82
63	2	2	L	1	0
63	2	2	L	3	5
63	2	3	R	1	0
63	2	3	R	4	3
63	2	4	R	1	0
63	2	4	R	3	5
63	2	4	R	11	72
63	2	4	R	1	78
63	2	4	R	3	84
63	2	4	R	11	135
63	2	4	R	1	146
63	2	4	R	4	150
64	2	1	L	1	0
64	2	1	L	3	9
64	2	2	R	1	0
64	2	2	R	3	6
64	2	2	R	11	48
64	2	2	R	1	52
64	2	2	R	4	59
64	2	3	R	1	0
64	2	3	R	4	11
64	2	4	L	1	0
64	2	4	L	4	5
64	2	4	L	7	22
64	2	4	L	3	31
65	2	1	R	1	0
65	2	1	R	4	4
65	2	2	L	1	0
65	2	2	L	4	7
65	2	2	L	11	53
65	2	2	L	1	59
65	2	2	L	3	67
65	2	3	L	1	0
65	2	3	L	3	4
65	2	4	L	1	0
65	2	4	L	3	7
66	2	1	R	1	0
66	2	1	R	3	8
66	2	1	R	11	48
66	2	1	R	1	56
66	2	1	R	4	60
66	2	2	R	1	0
66	2	2	R	4	5
66	2	3	R	1	0
66	2	3	R	4	3
66	2	4	R	1	0
66	2	4	R	4	8
67	2	1	L	1	0
67	2	1	L	5	13
67	2	1	L	8	19
67	2	1	L	4	31
67	2	1	L	11	74
67	2	1	L	1	82
67	2	1	L	3	87
67	2	2	R	1	0
67	2	2	R	4	3
67	2	3	R	1	0
67	2	3	R	4	8
67	2	4	L	1	0
67	2	4	L	4	4
67	2	4	L	11	45
67	2	4	L	1	53
67	2	4	L	3	57
69	2	1	R	1	0
69	2	1	R	4	3
69	2	2	L	1	0
69	2	2	L	3	3
69	2	3	R	1	0
69	2	3	R	3	14
69	2	3	R	11	56
69	2	3	R	1	62
69	2	3	R	4	65
69	2	4	R	1	0
69	2	4	R	4	8
70	2	1	L	1	0
70	2	1	L	3	3
70	2	2	L	1	0
70	2	2	L	3	5
70	2	3	L	1	0
70	2	3	L	3	3
70	2	4	L	1	0
70	2	4	L	3	7
71	2	1	L	1	0
71	2	1	L	3	3
71	2	2	L	1	0
71	2	2	L	3	2
71	2	3	R	1	0
71	2	3	R	3	7
[truncated: 6,471 more rows]

## Sheet: expt 2 raw
session	snake	trial	correct	event	time
1	11	1	L	1	0
1	11	1	L	4	3
1	11	1	L	7	66
1	11	1	L	5	81
1	11	1	L	8	84
1	11	1	L	3	90
1	11	1	L	14	119
1	11	2	R	1	0
1	11	2	R	2	12
1	11	2	R	1	15
1	11	2	R	2	21
1	11	2	R	1	22
1	11	2	R	10	30
1	11	2	R	2	40
1	11	2	R	1	41
1	11	2	R	4	42
1	11	2	R	14	45
1	11	3	L	1	0
1	11	3	L	5	4
1	11	3	L	8	8
1	11	3	L	3	19
1	11	3	L	14	27
1	11	1	L	1	0
1	11	1	L	4	5
1	11	1	L	7	99
1	11	1	L	5	103
1	11	1	L	8	107
1	11	1	L	3	111
1	11	1	L	14	132
1	11	2	L	1	0
1	11	2	L	5	4
1	11	2	L	8	6
1	11	2	L	3	11
1	11	2	L	14	22
1	11	3	L	1	0
1	11	3	L	4	3
1	11	3	L	7	22
1	11	3	L	3	30
1	11	3	L	14	43
1	12	1	L	1	0
1	12	1	L	3	4
1	12	1	L	14	31
1	12	2	R	1	0
1	12	2	R	3	8
1	12	2	R	6	131
1	12	2	R	5	148
1	12	2	R	8	152
1	12	2	R	4	161
1	12	2	R	14	203
1	12	3	R	1	0
1	12	3	R	4	1
1	12	3	R	14	15
1	12	1	L	1	0
1	12	1	L	3	7
1	12	1	L	14	33
1	12	2	R	1	0
1	12	2	R	4	6
1	12	2	R	14	30
1	12	3	L	1	0
1	12	3	L	4	7
1	12	3	L	7	11
1	12	3	L	5	18
1	12	3	L	8	23
1	12	3	L	3	32
1	12	3	L	14	51
1	14	1	R	1	0
1	14	1	R	3	5
1	14	1	R	6	85
1	14	1	R	5	110
1	14	1	R	8	114
1	14	1	R	4	127
1	14	1	R	14	175
1	14	2	R	1	0
1	14	2	R	4	4
1	14	2	R	14	17
1	14	3	R	1	0
1	14	3	R	4	3
1	14	3	R	14	41
1	14	1	L	1	0
1	14	1	L	3	3
1	14	1	L	14	22
1	14	2	R	1	0
1	14	2	R	5	6
1	14	2	R	8	10
1	14	2	R	3	15
1	14	2	R	6	150
1	14	2	R	5	165
1	14	2	R	8	175
1	14	2	R	4	188
1	14	2	R	14	400
1	14	3	L	1	0
1	14	3	L	5	8
1	14	3	L	8	15
1	14	3	L	4	24
1	14	3	L	7	133
1	14	3	L	5	150
1	14	3	L	8	154
1	14	3	L	3	262
1	14	3	L	14	369
1	15	1	R	1	0
1	15	1	R	3	4
1	15	1	R	11	235
1	15	1	R	1	256
1	15	1	R	4	262
1	15	1	R	14	284
1	15	2	R	1	0
1	15	2	R	2	14
1	15	2	R	1	15
1	15	2	R	2	25
1	15	2	R	1	26
1	15	2	R	2	29
1	15	2	R	1	30
1	15	2	R	2	33
1	15	2	R	1	34
1	15	2	R	2	40
1	15	2	R	1	41
1	15	2	R	2	68
1	15	2	R	1	69
1	15	2	R	2	75
1	15	2	R	1	76
1	15	2	R	3	87
1	15	2	R	6	154
1	15	2	R	2	166
1	15	2	R	1	167
1	15	2	R	2	180
1	15	2	R	1	181
1	15	2	R	2	234
1	15	2	R	1	235
1	15	2	R	2	249
1	15	2	R	1	250
1	15	2	R	2	260
1	15	2	R	1	261
1	15	2	R	4	282
1	15	2	R	14	306
1	15	3	L	1	0
1	15	3	L	2	18
1	15	3	L	1	19
1	15	3	L	5	30
1	15	3	L	8	32
1	15	3	L	2	49
1	15	3	L	1	51
1	15	3	L	10	64
1	15	3	L	2	68
1	15	3	L	1	69
1	15	3	L	2	79
1	15	3	L	1	80
1	15	3	L	3	87
1	15	3	L	14	127
1	15	1	R	1	0
1	15	1	R	4	6
1	15	1	R	14	32
1	15	2	R	1	0
1	15	2	R	3	12
1	15	2	R	11	360
1	15	2	R	1	415
1	15	2	R	4	426
1	15	2	R	14	444
1	15	3	L	1	0
1	15	3	L	2	3
1	15	3	L	1	4
1	15	3	L	2	19
1	15	3	L	1	20
1	15	3	L	4	26
1	15	3	L	7	115
1	15	3	L	2	133
1	15	3	L	1	134
1	15	3	L	2	158
1	15	3	L	1	159
1	15	3	L	2	163
1	15	3	L	1	164
1	15	3	L	10	185
1	15	3	L	2	190
1	15	3	L	1	191
1	15	3	L	3	295
1	15	3	L	14	239
1	17	1	L	1	0
1	17	1	L	3	6
1	17	1	L	14	27
1	17	2	L	1	0
1	17	2	L	2	9
1	17	2	L	1	10
1	17	2	L	2	25
1	17	2	L	1	29
1	17	2	L	10	37
1	17	2	L	3	42
1	17	2	L	14	62
1	17	3	L	1	0
1	17	3	L	5	10
1	17	3	L	8	14
1	17	3	L	5	19
1	17	3	L	8	21
1	17	3	L	3	28
1	17	3	L	14	43
1	17	1	R	1	0
1	17	1	R	5	7
1	17	1	R	8	11
1	17	1	R	3	16
1	17	1	R	6	634
1	17	1	R	5	700
1	17	1	R	8	704
1	17	1	R	4	716
1	17	1	R	14	743
1	17	2	L	1	0
1	17	2	L	3	6
1	17	2	L	14	22
1	17	3	R	1	0
1	17	3	R	3	5
1	17	3	R	6	32
1	17	3	R	3	38
1	17	3	R	6	70
1	17	3	R	5	80
1	17	3	R	8	84
1	17	3	R	3	104
1	17	3	R	6	121
1	17	3	R	2	127
1	17	3	R	1	128
1	17	3	R	2	130
1	17	3	R	1	131
1	17	3	R	10	145
1	17	3	R	11	147
1	17	3	R	1	153
1	17	3	R	3	158
1	17	3	R	6	146
1	17	3	R	10	160
1	17	3	R	11	179
1	17	3	R	1	183
1	17	3	R	5	194
1	17	3	R	8	196
1	17	3	R	3	200
1	17	3	R	6	257
1	17	3	R	10	263
1	17	3	R	2	284
1	17	3	R	1	285
1	17	3	R	3	290
1	17	3	R	6	311
1	17	3	R	2	315
1	17	3	R	1	318
1	17	3	R	10	325
1	17	3	R	11	333
1	17	3	R	1	342
1	17	3	R	3	345
1	17	3	R	6	352
1	17	3	R	5	357
1	17	3	R	8	359
1	17	3	R	4	366
1	17	3	R	14	398
1	18	1	R	1	0
1	18	1	R	4	5
1	18	1	R	14	45
1	18	2	L	1	0
1	18	2	L	2	15
1	18	2	L	1	16
1	18	2	L	3	41
1	18	2	L	14	71
1	18	3	L	1	0
1	18	3	L	3	4
1	18	3	L	14	22
1	18	1	R	1	0
1	18	1	R	3	12
1	18	1	R	6	111
1	18	1	R	3	141
1	18	1	R	6	185
1	18	1	R	3	206
1	18	1	R	6	480
1	18	1	R	5	491
1	18	1	R	8	496
1	18	1	R	4	511
1	18	1	R	14	535
1	18	2	L	1	0
1	18	2	L	3	4
1	18	2	L	14	33
1	18	3	R	1	0
1	18	3	R	3	5
1	18	3	R	6	75
1	18	3	R	2	89
1	18	3	R	1	90
1	18	3	R	10	115
1	18	3	R	4	128
1	18	3	R	14	168
2	11	1	R	1	0
2	11	1	R	3	3
2	11	1	R	6	33
2	11	1	R	4	50
2	11	1	R	14	90
2	11	2	L	5	1
2	11	2	L	8	4
2	11	2	L	10	10
2	11	2	L	2	22
2	11	2	L	1	23
2	11	2	L	4	24
2	11	2	L	7	73
2	11	2	L	5	84
2	11	2	L	8	88
2	11	2	L	3	93
2	11	2	L	14	102
2	11	3	L	1	0
2	11	3	L	5	4
2	11	3	L	8	6
2	11	3	L	3	12
2	11	3	L	14	21
2	12	1	L	4	5
2	12	1	L	7	22
2	12	1	L	5	29
2	12	1	L	8	34
2	12	1	L	3	44
2	12	1	L	14	90
2	12	2	L	1	0
2	12	2	L	4	4
2	12	2	L	7	20
2	12	2	L	5	29
2	12	2	L	8	32
2	12	2	L	3	41
2	12	2	L	14	80
2	12	3	R	1	0
2	12	3	R	4	1
2	12	3	R	14	18
2	14	1	R	1	0
2	14	1	R	5	16
2	14	1	R	8	22
2	14	1	R	3	32
2	14	1	R	6	185
2	14	1	R	5	208
2	14	1	R	8	216
2	14	1	R	4	225
2	14	1	R	14	498
2	14	2	L	1	0
2	14	2	L	3	3
2	14	2	L	14	165
2	14	3	R	1	0
2	14	3	R	4	4
2	14	3	R	14	76
2	15	1	L	1	0
2	15	1	L	3	8
2	15	1	L	14	195
2	15	2	R	1	0
2	15	2	R	4	15
2	15	2	R	14	60
2	15	3	R	1	0
2	15	3	R	4	11
2	15	3	R	14	37
2	17	1	R	1	0
2	17	1	R	4	3
2	17	1	R	14	50
2	17	2	R	1	0
2	17	2	R	5	6
2	17	2	R	8	11
2	17	2	R	4	15
2	17	2	R	14	47
2	17	3	R	1	0
2	17	3	R	10	5
2	17	3	R	4	21
2	17	3	R	14	51
2	18	1	L	1	0
2	18	1	L	4	4
2	18	1	L	7	396
2	18	1	L	4	430
2	18	1	L	7	447
2	18	1	L	4	448
2	18	1	L	11	518
2	18	1	L	1	724
2	18	1	L	3	729
2	18	1	L	14	762
2	18	2	R	1	0
2	18	2	R	3	4
2	18	2	R	11	285
2	18	2	R	1	292
2	18	2	R	4	296
2	18	2	R	14	318
2	18	3	L	1	0
2	18	3	L	4	8
2	18	3	L	7	216
2	18	3	L	4	228
2	18	3	L	7	250
2	18	3	L	5	258
2	18	3	L	8	266
2	18	3	L	3	276
2	18	3	L	14	293
3	11	1	L	1	0
3	11	1	L	3	2
3	11	1	L	14	19
3	11	2	L	1	0
3	11	2	L	3	2
3	11	2	L	14	10
3	11	3	R	1	0
3	11	3	R	2	11
3	11	3	R	1	12
3	11	3	R	11	24
3	11	3	R	1	28
3	11	3	R	5	35
3	11	3	R	8	37
3	11	3	R	3	46
3	11	3	R	6	116
3	11	3	R	10	122
3	11	3	R	5	125
3	11	3	R	8	127
3	11	3	R	4	133
3	11	3	R	14	170
3	12	1	R	1	0
3	12	1	R	3	5
3	12	1	R	6	68
3	12	1	R	5	81
3	12	1	R	8	89
3	12	1	R	4	97
3	12	1	R	14	135
3	12	2	R	1	0
3	12	2	R	4	6
3	12	2	R	14	30
3	12	3	R	1	0
3	12	3	R	4	3
3	12	3	R	14	14
3	13	1	L	1	0
3	13	1	L	3	10
3	13	1	L	6	98
3	13	1	L	13	134
3	13	2	L	1	0
3	13	2	L	3	19
3	13	2	L	14	69
3	13	3	R	1	0
3	13	3	R	2	47
3	13	3	R	1	49
3	13	3	R	2	61
3	13	3	R	1	62
3	13	3	R	2	79
3	13	3	R	1	80
3	13	3	R	5	110
3	13	3	R	8	113
3	13	3	R	2	125
3	13	3	R	1	126
3	13	3	R	2	134
3	13	3	R	1	135
3	13	3	R	5	149
3	13	3	R	8	152
3	13	3	R	2	159
3	13	3	R	1	160
3	13	3	R	4	185
3	13	3	R	14	209
3	14	1	R	1	0
3	14	1	R	4	4
3	14	1	R	14	110
3	14	2	L	1	0
3	14	2	L	3	4
3	14	2	L	14	48
3	14	3	R	1	0
3	14	3	R	3	2
3	14	3	R	6	70
3	14	3	R	5	87
3	14	3	R	8	92
3	14	3	R	4	107
3	14	3	R	14	149
3	15	1	R	1	0
3	15	1	R	3	10
3	15	1	R	11	269
3	15	1	R	1	316
3	15	1	R	4	323
3	15	1	R	14	338
3	15	2	L	1	0
3	15	2	L	2	11
3	15	2	L	1	12
3	15	2	L	3	19
3	15	2	L	14	41
3	15	3	L	1	0
3	15	3	L	4	8
3	15	3	L	7	142
3	15	3	L	5	221
3	15	3	L	8	244
3	15	3	L	3	283
3	15	3	L	14	326
3	17	1	R	1	0
3	17	1	R	4	5
3	17	1	R	14	23
3	17	2	L	1	0
3	17	2	L	3	5
3	17	2	L	14	24
3	17	3	R	1	0
3	17	3	R	10	9
3	17	3	R	10	11
3	17	3	R	11	14
3	17	3	R	1	20
3	17	3	R	3	22
3	17	3	R	6	28
3	17	3	R	4	35
3	17	3	R	14	48
3	18	1	L	1	0
3	18	1	L	2	8
3	18	1	L	1	9
3	18	1	L	4	13
3	18	1	L	7	107
3	18	1	L	2	128
3	18	1	L	1	129
3	18	1	L	2	134
3	18	1	L	1	135
3	18	1	L	2	147
3	18	1	L	1	148
3	18	1	L	2	154
3	18	1	L	1	155
3	18	1	L	2	268
3	18	1	L	1	269
3	18	1	L	4	188
3	18	1	L	7	230
3	18	1	L	2	243
3	18	1	L	1	244
3	18	1	L	3	289
3	18	1	L	14	342
3	18	2	R	1	0
3	18	2	R	3	7
3	18	2	R	6	154
3	18	2	R	3	191
3	18	2	R	6	212
3	18	2	R	5	228
3	18	2	R	8	238
3	18	2	R	4	247
3	18	2	R	14	282
3	18	3	L	1	0
3	18	3	L	4	5
3	18	3	L	7	28
3	18	3	L	5	35
3	18	3	L	8	38
3	18	3	L	10	41
3	18	3	L	3	60
3	18	3	L	14	73
4	11	1	L	1	0
4	11	1	L	5	7
4	11	1	L	8	12
4	11	1	L	10	19
4	11	1	L	4	23
4	11	1	L	7	44
4	11	1	L	5	48
4	11	1	L	8	50
4	11	1	L	3	58
4	11	1	L	6	115
4	11	1	L	13	145
4	11	2	R	1	0
4	11	2	R	5	4
4	11	2	R	8	5
4	11	2	R	3	9
4	11	2	R	6	22
4	11	2	R	10	33
4	11	2	R	10	39
4	11	2	R	10	42
4	11	2	R	10	48
4	11	2	R	10	53
4	11	2	R	11	58
4	11	2	R	1	64
4	11	2	R	10	67
4	11	2	R	11	74
4	11	2	R	1	88
4	11	2	R	10	97
4	11	2	R	10	101
4	11	2	R	11	105
4	11	2	R	1	114
4	11	2	R	4	118
4	11	2	R	7	119
4	11	2	R	5	128
4	11	2	R	8	129
4	11	2	R	3	134
4	11	2	R	6	144
4	11	2	R	5	148
4	11	2	R	8	149
4	11	2	R	4	160
4	11	2	R	14	169
4	11	3	R	1	0
4	11	3	R	10	10
4	11	3	R	10	13
4	11	3	R	4	22
4	11	3	R	14	27
4	12	1	R	1	0
4	12	1	R	4	3
4	12	1	R	14	51
4	12	2	L	1	0
4	12	2	L	4	8
4	12	2	L	7	14
4	12	2	L	5	23
4	12	2	L	8	27
4	12	2	L	3	38
4	12	2	L	14	80
4	12	3	L	1	0
4	12	3	L	4	6
4	12	3	L	7	28
4	12	3	L	3	57
4	12	3	L	14	74
4	14	1	R	1	0
4	14	1	R	3	5
4	14	1	R	6	70
4	14	1	R	5	84
4	14	1	R	8	88
4	14	1	R	4	109
4	14	1	R	14	307
4	14	2	L	1	0
4	14	2	L	4	3
4	14	2	L	7	51
4	14	2	L	4	60
4	14	2	L	7	145
4	14	2	L	4	194
4	14	2	L	11	208
4	14	2	L	1	226
4	14	2	L	3	230
4	14	2	L	14	269
4	14	3	R	1	0
4	14	3	R	4	5
4	14	3	R	14	117
4	15	1	L	1	0
4	15	1	L	4	4
4	15	1	L	7	23
4	15	1	L	4	239
4	15	1	L	7	387
4	15	1	L	3	444
4	15	1	L	14	504
4	15	2	L	1	0
4	15	2	L	4	4
4	15	2	L	7	82
4	15	2	L	5	107
4	15	2	L	8	131
4	15	2	L	3	150
4	15	2	L	14	187
4	15	3	L	1	0
4	15	3	L	4	4
4	15	3	L	7	21
4	15	3	L	4	28
4	15	3	L	2	93
4	15	3	L	1	95
4	15	3	L	4	114
4	15	3	L	11	408
4	15	3	L	1	416
4	15	3	L	2	421
4	15	3	L	1	422
4	15	3	L	3	433
4	15	3	L	14	445
4	17	1	R	1	0
4	17	1	R	1	0
4	17	1	R	4	7
4	17	1	R	14	67
4	17	2	L	1	0
4	17	2	L	3	2
4	17	2	L	14	17
4	17	3	R	1	0
4	17	3	R	5	4
4	17	3	R	8	7
4	17	3	R	3	14
4	17	3	R	6	30
4	17	3	R	5	40
4	17	3	R	8	44
4	17	3	R	4	52
4	17	3	R	14	69
4	18	1	R	1	0
4	18	1	R	4	6
4	18	1	R	14	17
4	18	2	R	4	3
4	18	2	R	14	109
4	18	3	L	1	0
4	18	3	L	3	4
4	18	3	L	14	43
5	11	1	R	1	0
5	11	1	R	5	5
5	11	1	R	8	8
5	11	1	R	3	14
5	11	1	R	6	30
5	11	1	R	4	38
5	11	1	R	7	77
5	11	1	R	14	180
5	11	2	L	1	0
5	11	2	L	10	6
5	11	2	L	10	11
5	11	2	L	10	14
5	11	2	L	11	20
5	11	2	L	1	23
5	11	2	L	10	31
5	11	2	L	3	36
5	11	2	L	14	57
5	11	3	R	1	0
5	11	3	R	10	5
5	11	3	R	5	8
5	11	3	R	8	10
5	11	3	R	10	14
5	11	3	R	10	20
5	11	3	R	10	23
5	11	3	R	11	28
5	11	3	R	1	38
5	11	3	R	10	46
5	11	3	R	5	50
5	11	3	R	8	53
5	11	3	R	10	57
5	11	3	R	10	61
5	11	3	R	10	66
5	11	3	R	11	76
5	11	3	R	1	87
5	11	3	R	5	95
5	11	3	R	8	98
5	11	3	R	3	103
5	11	3	R	6	110
5	11	3	R	5	114
5	11	3	R	8	118
5	11	3	R	4	120
5	11	3	R	14	133
5	12	1	R	1	0
5	12	1	R	3	5
5	12	1	R	6	129
5	12	1	R	5	141
5	12	1	R	8	146
5	12	1	R	4	158
5	12	1	R	14	230
5	12	2	R	4	2
5	12	2	R	14	17
5	12	3	R	1	0
5	12	3	R	3	3
5	12	3	R	6	47
5	12	3	R	5	104
5	12	3	R	8	108
5	12	3	R	4	117
5	12	3	R	14	92
5	14	1	L	1	0
5	14	1	L	5	4
5	14	1	L	8	10
5	14	1	L	4	17
5	14	1	L	7	98
5	14	1	L	4	128
5	14	1	L	11	210
5	14	1	L	1	265
5	14	1	L	5	270
5	14	1	L	8	276
5	14	1	L	10	283
5	14	1	L	4	298
5	14	1	L	7	341
5	14	1	L	3	390
5	14	1	L	14	495
5	14	2	L	1	0
5	14	2	L	5	6
5	14	2	L	8	8
5	14	2	L	3	10
5	14	2	L	14	46
5	14	3	R	1	0
5	14	3	R	10	19
5	14	3	R	10	23
5	14	3	R	2	27
5	14	3	R	1	29
5	14	3	R	10	39
5	14	3	R	4	50
5	14	3	R	14	99
5	15	1	L	1	0
5	15	1	L	3	3
5	15	1	L	14	27
5	15	2	R	1	0
5	15	2	R	5	20
5	15	2	R	8	29
5	15	2	R	3	55
5	15	2	R	6	180
5	15	2	R	3	194
5	15	2	R	6	203
5	15	2	R	3	256
5	15	2	R	6	318
5	15	2	R	5	398
5	15	2	R	8	406
5	15	2	R	4	435
5	15	2	R	14	487
5	15	3	R	1	0
5	15	3	R	3	27
5	15	3	R	6	55
5	15	3	R	4	142
5	15	3	R	14	175
5	17	1	L	1	0
5	17	1	L	5	54
5	17	1	L	8	67
5	17	1	L	3	92
5	17	1	L	14	110
5	17	2	R	1	0
5	17	2	R	3	3
5	17	2	R	6	108
5	17	2	R	3	123
5	17	2	R	6	138
5	17	2	R	3	163
5	17	2	R	6	169
5	17	2	R	11	173
5	17	2	R	1	187
5	17	2	R	11	195
5	17	2	R	1	205
5	17	2	R	5	209
5	17	2	R	8	213
5	17	2	R	3	225
5	17	2	R	6	277
5	17	2	R	3	284
5	17	2	R	6	289
5	17	2	R	5	296
5	17	2	R	8	301
5	17	2	R	4	323
5	17	2	R	14	327
5	17	3	L	1	0
5	17	3	L	4	8
5	17	3	L	7	26
5	17	3	L	10	35
5	17	3	L	2	43
5	17	3	L	1	44
5	17	3	L	10	51
5	17	3	L	11	52
5	17	3	L	1	80
5	17	3	L	5	86
5	17	3	L	8	90
5	17	3	L	2	100
5	17	3	L	1	101
5	17	3	L	10	105
5	17	3	L	2	110
5	17	3	L	1	111
5	17	3	L	10	112
5	17	3	L	11	115
5	17	3	L	1	120
5	17	3	L	3	138
5	17	3	L	14	155
5	18	1	L	1	0
5	18	1	L	5	9
5	18	1	L	8	15
5	18	1	L	3	26
5	18	1	L	14	47
5	18	2	R	1	0
5	18	2	R	5	7
5	18	2	R	8	8
5	18	2	R	3	13
5	18	2	R	6	257
5	18	2	R	3	265
5	18	2	R	6	295
5	18	2	R	2	313
5	18	2	R	1	314
5	18	2	R	2	328
5	18	2	R	1	329
5	18	2	R	3	348
5	18	2	R	11	384
5	18	2	R	1	392
5	18	2	R	4	401
5	18	2	R	14	443
5	18	3	R	1	0
5	18	3	R	4	5
5	18	3	R	14	29
6	11	1	R	1	0
6	11	1	R	3	5
6	11	1	R	6	41
6	11	1	R	5	50
6	11	1	R	8	55
6	11	1	R	4	61
6	11	1	R	14	106
6	11	2	L	1	0
6	11	2	L	5	4
6	11	2	L	8	6
6	11	2	L	4	11
6	11	2	L	7	89
6	11	2	L	2	101
6	11	2	L	1	102
6	11	2	L	2	107
6	11	2	L	1	108
6	11	2	L	5	117
6	11	2	L	8	119
6	11	2	L	3	124
6	11	2	L	14	135
6	11	3	L	1	0
6	11	3	L	3	2
6	11	3	L	14	9
6	12	1	R	1	0
6	12	1	R	3	8
6	12	1	R	6	40
6	12	1	R	5	49
6	12	1	R	8	53
6	12	1	R	4	60
6	12	1	R	14	102
6	12	2	L	1	0
6	12	2	L	3	6
6	12	2	L	14	27
6	12	3	L	1	0
6	12	3	L	4	4
6	12	3	L	7	45
6	12	3	L	5	60
6	12	3	L	8	67
6	12	3	L	3	77
6	12	3	L	14	100
6	13	1	R	1	0
6	13	1	R	5	17
6	13	1	R	8	21
6	13	1	R	5	24
6	13	1	R	8	33
6	13	1	R	4	44
6	13	1	R	14	133
6	13	2	L	1	0
6	13	2	L	5	39
6	13	2	L	8	42
6	13	2	L	3	47
6	13	2	L	14	106
6	13	3	R	1	0
6	13	3	R	3	8
6	13	3	R	6	23
6	13	3	R	3	60
6	13	3	R	6	133
6	13	3	R	3	162
6	13	3	R	6	196
6	13	3	R	3	214
6	13	3	R	6	235
6	13	3	R	3	256
6	13	3	R	6	277
6	13	3	R	2	318
6	13	3	R	1	319
6	13	3	R	5	326
6	13	3	R	8	330
6	13	3	R	2	339
6	13	3	R	1	340
6	13	3	R	5	355
6	13	3	R	8	356
6	13	3	R	4	393
6	13	3	R	14	438
6	14	1	L	1	0
6	14	1	L	5	5
6	14	1	L	8	10
6	14	1	L	4	20
6	14	1	L	11	198
6	14	1	L	1	226
6	14	1	L	3	240
6	14	1	L	6	289
6	14	1	L	14	103
6	14	2	L	1	0
6	14	2	L	3	17
6	14	2	L	14	74
6	14	3	R	1	0
6	14	3	R	3	5
6	14	3	R	6	87
6	14	3	R	5	107
6	14	3	R	8	115
6	14	3	R	4	126
6	14	3	R	14	98
6	15	1	L	1	0
6	15	1	L	3	8
6	15	1	L	14	60
6	15	2	L	1	0
6	15	2	L	3	17
6	15	2	L	14	42
6	15	3	L	1	0
6	15	3	L	3	4
6	15	3	L	14	16
6	17	1	L	1	0
6	17	1	L	3	4
6	17	1	L	14	38
6	17	2	R	1	0
6	17	2	R	3	12
6	17	2	R	6	92
6	17	2	R	5	100
6	17	2	R	8	109
6	17	2	R	4	124
6	17	2	R	14	154
6	17	3	L	1	0
6	17	3	L	10	17
6	17	3	L	2	19
6	17	3	L	11	26
6	17	3	L	1	32
6	17	3	L	2	37
6	17	3	L	1	39
6	17	3	L	3	43
6	17	3	L	14	62
6	18	1	R	1	0
6	18	1	R	3	9
6	18	1	R	6	132
6	18	1	R	2	145
6	18	1	R	1	146
6	18	1	R	2	156
6	18	1	R	1	157
6	18	1	R	3	163
6	18	1	R	11	330
6	18	1	R	1	355
6	18	1	R	5	360
6	18	1	R	8	367
6	18	1	R	10	370
6	18	1	R	4	372
6	18	1	R	14	404
6	18	2	R	1	0
6	18	2	R	3	7
6	18	2	R	6	202
6	18	2	R	2	218
6	18	2	R	1	219
6	18	2	R	2	225
6	18	2	R	1	226
6	18	2	R	3	235
6	18	2	R	6	276
6	18	2	R	5	280
6	18	2	R	8	283
6	18	2	R	4	290
6	18	2	R	14	316
6	18	3	R	1	0
6	18	3	R	3	5
6	18	3	R	6	96
6	18	3	R	4	124
6	18	3	R	14	153
7	11	1	L	1	0
7	11	1	L	4	6
7	11	1	L	7	84
7	11	1	L	4	104
7	11	1	L	7	141
7	11	1	L	5	164
7	11	1	L	8	176
7	11	1	L	3	189
7	11	1	L	14	206
7	11	2	R	1	0
7	11	2	R	2	6
7	11	2	R	1	20
7	11	2	R	4	26
7	11	2	R	14	39
7	11	3	L	1	0
7	11	3	L	4	4
7	11	3	L	7	52
7	11	3	L	3	70
7	11	3	L	14	84
7	12	1	L	1	0
7	12	1	L	4	5
7	12	1	L	7	64
7	12	1	L	4	88
7	12	1	L	7	138
7	12	1	L	3	168
7	12	1	L	14	239
7	12	2	L	1	0
7	12	2	L	3	4
7	12	2	L	14	54
7	12	3	R	1	0
7	12	3	R	4	5
7	12	3	R	14	40
7	13	1	L	1	0
7	13	1	L	3	10
7	13	1	L	14	60
7	13	2	R	1	0
7	13	2	R	4	4
7	13	2	R	14	18
7	13	3	R	1	0
7	13	3	R	4	4
7	13	3	R	14	16
7	14	1	R	1	0
7	14	1	R	3	8
7	14	1	R	6	81
7	14	1	R	5	99
7	14	1	R	8	108
7	14	1	R	4	121
7	14	1	R	14	194
7	14	2	L	1	0
7	14	2	L	3	8
7	14	2	L	14	58
7	14	3	L	1	0
7	14	3	L	3	4
7	14	3	L	14	100
7	15	1	R	1	0
7	15	1	R	3	10
7	15	1	R	11	230
7	15	1	R	1	260
7	15	1	R	3	285
7	15	1	R	7	309
7	15	1	R	2	371
7	15	1	R	1	385
7	15	1	R	3	400
7	15	1	R	7	407
7	15	1	R	3	414
7	15	1	R	7	419
7	15	1	R	3	422
7	15	1	R	11	550
7	15	1	R	1	600
7	15	1	R	4	682
7	15	1	R	14	727
7	15	2	R	1	0
7	15	2	R	10	7
7	15	2	R	1	20
7	15	2	R	2	30
7	15	2	R	1	60
7	15	2	R	3	227
7	15	2	R	6	253
7	15	2	R	3	324
7	15	2	R	11	374
7	15	2	R	1	392
7	15	2	R	4	423
7	15	2	R	14	453
7	15	3	L	1	0
7	15	3	L	3	14
7	15	3	L	14	51
7	17	1	L	1	0
7	17	1	L	5	5
7	17	1	L	8	10
7	17	1	L	4	22
7	17	1	L	7	25
7	17	1	L	10	56
7	17	1	L	1	75
7	17	1	L	3	85
7	17	1	L	14	130
7	17	2	R	1	0
7	17	2	R	5	4
7	17	2	R	8	7
7	17	2	R	4	46
7	17	2	R	14	65
7	17	3	L	1	0
7	17	3	L	10	10
7	17	3	L	1	21
7	17	3	L	10	37
7	17	3	L	1	58
7	17	3	L	3	63
7	17	3	L	14	80
7	18	1	L	1	0
7	18	1	L	4	11
7	18	1	L	11	110
7	18	1	L	1	150
7	18	1	L	4	153
7	18	1	L	11	190
7	18	1	L	1	210
7	18	1	L	3	223
7	18	1	L	14	256
7	18	2	R	1	0
7	18	2	R	4	8
7	18	2	R	14	27
7	18	3	R	1	0
7	18	3	R	4	4
7	18	3	R	14	38
8	11	1	L	1	0
8	11	1	L	4	6
8	11	1	L	7	72
8	11	1	L	5	85
8	11	1	L	8	92
8	11	1	L	3	104
8	11	1	L	14	149
8	11	2	L	1	0
8	11	2	L	5	3
8	11	2	L	8	6
8	11	2	L	4	10
8	11	2	L	7	103
8	11	2	L	3	114
8	11	2	L	14	135
8	11	3	R	1	0
8	11	3	R	3	6
8	11	3	R	6	8
8	11	3	R	5	11
8	11	3	R	8	13
8	11	3	R	4	18
8	11	3	R	14	21
8	12	1	L	1	0
8	12	1	L	4	9
8	12	1	L	7	41
8	12	1	L	3	62
8	12	1	L	14	125
8	12	2	R	1	0
8	12	2	R	4	6
8	12	2	R	14	42
8	12	3	R	1	0
8	12	3	R	4	5
8	12	3	R	14	47
8	13	1	L	1	0
8	13	1	L	3	12
8	13	1	L	14	43
8	13	2	R	1	0
8	13	2	R	3	9
8	13	2	R	6	68
8	13	2	R	5	89
8	13	2	R	8	94
8	13	2	R	4	104
8	13	2	R	14	110
8	13	3	L	1	0
8	13	3	L	4	6
8	13	3	L	7	40
8	13	3	L	5	44
8	13	3	L	8	47
8	13	3	L	3	56
8	13	3	L	14	64
8	14	1	R	1	0
8	14	1	R	4	8
8	14	1	R	14	53
8	14	2	L	1	0
8	14	2	L	4	4
8	14	2	L	7	163
8	14	2	L	5	174
8	14	2	L	8	177
8	14	2	L	3	202
8	14	2	L	14	272
8	14	3	L	1	0
8	14	3	L	3	7
8	14	3	L	14	61
8	15	1	R	1	0
8	15	1	R	5	16
8	15	1	R	8	44
8	15	1	R	4	74
8	15	1	R	14	113
8	15	2	R	1	0
8	15	2	R	3	5
8	15	2	R	11	55
8	15	2	R	1	90
8	15	2	R	10	103
8	15	2	R	1	125
8	15	2	R	10	145
8	15	2	R	1	170
8	15	2	R	3	178
8	15	2	R	11	306
8	15	2	R	1	320
8	15	2	R	4	356
8	15	2	R	14	389
8	15	3	L	1	0
8	15	3	L	4	4
8	15	3	L	14	85
8	17	1	R	1	0
8	17	1	R	4	7
8	17	1	R	14	75
8	17	2	R	1	0
8	17	2	R	4	5
8	17	2	R	14	17
8	17	3	L	1	0
8	17	3	L	3	9
8	17	3	L	14	17
8	18	1	R	1	0
8	18	1	R	3	7
8	18	1	R	11	127
8	18	1	R	1	145
8	18	1	R	4	150
8	18	1	R	14	196
8	18	2	R	1	0
8	18	2	R	3	4
8	18	2	R	11	55
8	18	2	R	1	75
8	18	2	R	3	79
8	18	2	R	11	174
8	18	2	R	1	200
8	18	2	R	5	218
8	18	2	R	8	221
8	18	2	R	4	244
8	18	2	R	14	264
8	18	3	L	1	0
8	18	3	L	2	18
8	18	3	L	1	40
8	18	3	L	3	44
8	18	3	L	14	63
9	11	1	L	1	0
9	11	1	L	5	4
9	11	1	L	8	9
9	11	1	L	4	14
9	11	1	L	7	97
9	11	1	L	3	125
9	11	1	L	14	147
9	11	2	R	1	0
9	11	2	R	5	6
9	11	2	R	8	13
9	11	2	R	10	26
9	11	2	R	1	36
9	11	2	R	3	39
9	11	2	R	6	135
9	11	2	R	5	142
9	11	2	R	8	148
9	11	2	R	4	253
9	11	2	R	14	270
9	11	3	L	1	0
9	11	3	L	5	4
9	11	3	L	8	9
9	11	3	L	3	15
9	11	3	L	14	32
9	12	1	L	1	0
9	12	1	L	3	5
9	12	1	L	14	21
9	12	2	R	1	0
9	12	2	R	2	30
9	12	2	R	1	41
9	12	2	R	2	75
9	12	2	R	1	92
9	12	2	R	4	102
9	12	2	R	14	122
9	12	3	R	1	0
9	12	3	R	4	6
9	12	3	R	14	28
9	13	1	R	1	0
9	13	1	R	3	8
9	13	1	R	6	48
9	13	1	R	4	75
9	13	1	R	14	109
9	13	2	L	1	0
9	13	2	L	4	9
9	13	2	L	7	52
9	13	2	L	5	61
9	13	2	L	8	64
9	13	2	L	3	76
9	13	2	L	14	112
9	13	3	L	1	0
9	13	3	L	4	7
9	13	3	L	11	100
9	13	3	L	1	120
9	13	3	L	4	142
9	13	3	L	11	180
9	13	3	L	1	211
9	13	3	L	4	225
9	13	3	L	7	244
9	13	3	L	3	315
9	13	3	L	14	351
9	14	1	R	1	0
9	14	1	R	3	17
9	14	1	R	11	100
9	14	1	R	1	107
9	14	1	R	3	111
9	14	1	R	11	160
9	14	1	R	1	207
9	14	1	R	4	226
9	14	1	R	14	268
9	14	2	L	1	0
9	14	2	L	3	10
9	14	2	L	14	41
9	14	3	L	1	0
9	14	3	L	5	5
9	14	3	L	8	21
9	14	3	L	5	27
9	14	3	L	8	42
9	14	3	L	3	71
9	14	3	L	14	136
9	15	1	L	1	0
9	15	1	L	4	7
9	15	1	L	11	200
9	15	1	L	1	215
9	15	1	L	3	221
9	15	1	L	14	249
9	15	2	L	1	0
9	15	2	L	3	4
9	15	2	L	14	29
9	15	3	R	1	0
9	15	3	R	3	17
9	15	3	R	6	77
9	15	3	R	3	108
9	15	3	R	11	190
9	15	3	R	1	211
9	15	3	R	3	226
9	15	3	R	6	273
9	15	3	R	3	356
9	15	3	R	11	410
9	15	3	R	1	434
9	15	3	R	4	470
9	15	3	R	14	495
9	17	1	R	1	0
9	17	1	R	4	5
9	17	1	R	14	31
9	17	2	R	1	0
9	17	2	R	4	5
9	17	2	R	14	23
9	17	3	R	1	0
9	17	3	R	5	8
9	17	3	R	8	20
9	17	3	R	5	24
9	17	3	R	8	32
9	17	3	R	4	47
9	17	3	R	14	62
9	18	1	R	1	0
9	18	1	R	4	5
9	18	1	R	14	22
9	18	2	L	1	0
9	18	2	L	3	4
9	18	2	L	14	31
9	18	3	L	1	0
9	18	3	L	3	4
9	18	3	L	14	32
10	11	1	R	1	0
10	11	1	R	4	9
10	11	1	R	14	47
10	11	2	L	1	0
10	11	2	L	5	5
10	11	2	L	8	9
10	11	2	L	3	20
10	11	2	L	14	74
10	11	3	R	1	0
10	11	3	R	5	4
10	11	3	R	8	9
10	11	3	R	4	21
10	11	3	R	14	28
10	12	1	R	1	0
10	12	1	R	3	16
10	12	1	R	6	80
10	12	1	R	4	106
10	12	1	R	14	151
10	12	2	R	1	0
10	12	2	R	4	5
10	12	2	R	14	23
10	12	3	R	1	0
10	12	3	R	4	6
10	12	3	R	14	41
10	13	1	R	1	0
10	13	1	R	4	4
10	13	1	R	14	18
10	13	2	L	1	0
10	13	2	L	3	6
10	13	2	L	14	23
10	13	3	R	1	0
10	13	3	R	4	4
10	13	3	R	14	56
10	14	1	L	1	0
10	14	1	L	3	8
10	14	1	L	14	387
10	14	2	L	1	0
10	14	2	L	3	6
10	14	3	R	1	0
10	14	3	R	4	6
10	15	1	L	1	0
10	15	1	L	3	7
10	15	1	L	14	35
10	15	2	L	1	0
10	15	2	L	10	49
10	15	2	L	1	63
10	15	2	L	2	88
10	15	2	L	1	105
10	15	2	L	4	120
10	15	2	L	7	193
10	17	1	R	1	0
10	17	1	R	4	6
10	17	1	R	14	36
10	17	2	L	1	0
10	17	2	L	5	18
10	17	2	L	8	23
10	17	2	L	4	33
10	17	2	L	11	90
10	17	2	L	1	104
10	17	2	L	3	109
10	17	2	L	14	160
10	17	3	L	1	0
10	17	3	L	3	3
10	17	3	L	6	10
10	17	3	L	10	21
10	17	3	L	1	35
10	17	3	L	3	41
10	17	3	L	6	50
10	17	3	L	5	56
10	17	3	L	8	63
10	17	3	L	10	74
10	17	3	L	1	90
10	17	3	L	5	105
10	17	3	L	4	114
10	17	3	L	7	137
10	17	3	L	10	181
10	17	3	L	1	230
10	17	3	L	4	236
10	17	3	L	14	240
10	18	1	R	1	0
10	18	1	R	3	5
10	18	1	R	6	99
10	18	1	R	3	134
10	18	1	R	11	170
10	18	1	R	1	190
10	18	1	R	5	199
10	18	1	R	8	204
10	18	1	R	5	208
10	18	1	R	8	212
10	18	1	R	3	219
10	18	1	R	11	250
10	18	1	R	1	260
10	18	1	R	4	267
10	18	1	R	14	290
10	18	2	R	1	0
10	18	2	R	4	3
10	18	2	R	14	20
10	18	3	R	1	0
10	18	3	R	3	10
10	18	3	R	11	60
10	18	3	R	1	75
10	18	3	R	3	81
10	18	3	R	11	110
10	18	3	R	1	130
10	18	3	R	3	137
10	18	3	R	6	176
10	18	3	R	10	185
10	18	3	R	1	195
10	18	3	R	3	200
10	18	3	R	6	215
10	18	3	R	5	225
10	18	3	R	8	232
10	18	3	R	4	247
10	18	3	R	14	284
11	11	1	R	1	0
11	11	1	R	4	6
11	11	1	R	14	29
11	11	2	L	1	0
11	11	2	L	3	15
11	11	2	L	14	27
11	12	1	R	1	0
11	12	1	R	3	5
11	12	1	R	11	50
11	12	1	R	1	80
11	12	1	R	3	96
11	12	1	R	6	127
11	12	1	R	4	145
11	12	1	R	14	169
11	12	2	L	1	0
11	12	2	L	3	5
11	12	2	L	14	21
11	13	1	R	1	0
11	13	1	R	3	5
11	13	1	R	6	46
11	13	1	R	5	61
11	13	1	R	8	64
11	13	1	R	4	86
11	13	1	R	14	108
11	13	2	L	1	0
11	13	2	L	4	4
11	13	2	L	7	84
11	13	2	L	3	108
11	13	2	L	14	121
11	14	1	R	1	0
11	14	1	R	2	15
11	14	1	R	1	27
11	14	1	R	5	31
11	14	1	R	8	33
11	14	1	R	3	72
11	14	1	R	11	140
11	14	1	R	1	168
11	14	1	R	3	171
11	14	1	R	6	215
11	14	1	R	5	226
11	14	1	R	8	229
11	14	1	R	4	236
11	14	1	R	14	264
11	14	2	L	1	0
11	14	2	L	5	6
11	14	2	L	8	18
11	14	2	L	5	33
11	14	2	L	8	45
11	14	2	L	3	59
11	14	2	L	14	142
11	15	1	L	1	0
11	15	1	L	4	14
11	15	1	L	11	50
11	15	1	L	1	60
11	15	2	L	1	0
11	15	2	L	4	27
11	15	2	L	7	71
11	17	1	L	1	0
11	17	1	L	4	10
11	17	1	L	11	90
11	17	1	L	1	108
11	17	1	L	5	113
11	17	1	L	8	149
11	17	1	L	4	163
11	17	1	L	7	271
11	17	1	L	5	292
11	17	1	L	8	298
11	17	1	L	3	307
11	17	1	L	14	334
11	17	2	R	1	0
11	17	2	R	10	7
11	17	2	R	1	20
11	17	2	R	10	42
11	17	2	R	1	60
11	17	2	R	5	70
11	17	2	R	8	75
11	17	2	R	4	82
11	17	2	R	14	88
11	18	1	L	1	0
11	18	1	L	3	6
11	18	1	L	14	97
11	18	2	R	1	0
11	18	2	R	4	4
11	18	2	R	14	20
12	11	1	L	1	0
12	11	1	L	5	2
12	11	1	L	8	5
12	11	1	L	10	30
12	11	1	L	1	46
12	11	1	L	4	50
12	11	1	L	7	80
12	11	1	L	4	90
12	11	1	L	7	112
12	11	1	L	5	132
12	11	1	L	8	140
12	11	1	L	3	147
12	11	1	L	14	162
12	11	2	R	1	0
12	11	2	R	4	4
12	11	2	R	14	13
12	11	3	L	1	0
12	11	3	L	3	4
12	11	3	L	14	17
12	12	1	R	1	0
12	12	1	R	4	4
12	12	1	R	14	59
12	12	2	L	1	0
12	12	2	L	4	3
12	12	2	L	11	90
12	12	2	L	1	140
12	12	2	L	3	156
12	12	2	L	14	187
12	12	3	R	1	0
12	12	3	R	4	6
12	12	3	R	14	75
12	13	1	L	1	0
12	13	1	L	4	5
12	13	1	L	7	92
12	13	1	L	5	127
12	13	1	L	8	138
12	13	1	L	3	152
12	13	1	L	14	225
12	13	2	L	1	0
12	13	2	L	4	4
12	13	2	L	7	74
12	13	2	L	5	91
12	13	2	L	8	94
12	13	2	L	3	110
12	13	2	L	14	121
12	13	3	L	1	0
12	13	3	L	4	3
12	13	3	L	7	54
12	13	3	L	3	81
12	13	3	L	14	105
12	14	1	L	1	0
12	14	1	L	4	4
12	14	1	L	7	240
12	14	1	L	4	248
12	14	1	L	11	565
12	14	1	L	1	585
12	14	1	L	5	600
12	14	1	L	8	617
12	14	1	L	4	643
12	14	1	L	11	780
12	14	1	L	1	822
12	14	1	L	11	937
12	14	1	L	1	961
12	14	1	L	4	966
12	14	1	L	11	940
12	14	1	L	1	1030
12	14	1	L	4	1036
12	14	1	L	11	1095
12	14	1	L	1	1125
12	14	1	L	3	1134
12	14	1	L	14	1155
12	14	2	L	1	0
12	14	2	L	4	3
12	14	2	L	11	210
12	14	2	L	1	258
12	14	2	L	5	266
12	14	2	L	8	272
12	14	2	L	3	280
12	14	2	L	14	329
12	14	3	L	1	0
12	14	3	L	4	3
12	14	3	L	11	210
12	14	3	L	1	253
12	14	3	L	4	257
12	14	3	L	11	330
12	14	3	L	1	350
12	14	3	L	3	354
12	14	3	L	14	494
12	15	1	R	1	0
12	15	1	R	4	7
12	15	1	R	14	24
12	15	2	L	1	0
12	15	2	L	4	4
12	15	2	L	11	330
12	15	2	L	1	348
12	15	2	L	5	360
12	15	2	L	8	393
12	15	2	L	3	408
12	15	2	L	14	460
12	15	3	R	1	0
12	15	3	R	5	3
12	15	3	R	8	15
12	15	3	R	4	115
12	15	3	R	14	136
12	17	1	L	1	0
12	17	1	L	5	11
12	17	1	L	8	21
12	17	1	L	5	26
12	17	1	L	8	34
12	17	1	L	10	52
12	17	1	L	1	75
12	17	1	L	10	92
12	17	1	L	1	110
12	17	1	L	3	114
12	17	1	L	14	201
12	17	2	L	1	0
12	17	2	L	10	8
12	17	2	L	1	25
12	17	2	L	10	33
12	17	2	L	1	50
12	17	2	L	10	55
12	17	2	L	1	75
12	17	2	L	10	110
12	17	2	L	1	125
12	17	2	L	10	134
12	17	2	L	1	150
12	17	2	L	10	170
12	17	2	L	1	180
12	17	2	L	3	191
12	17	2	L	14	216
12	17	3	L	1	0
12	17	3	L	3	3
12	17	3	L	14	27
12	18	1	L	1	0
12	18	1	L	5	12
12	18	1	L	8	22
12	18	1	L	3	38
12	18	1	L	14	131
12	18	2	R	1	0
12	18	2	R	3	3
12	18	2	R	11	40
12	18	2	R	1	70
12	18	2	R	4	75
12	18	2	R	14	98
12	18	3	R	1	0
12	18	3	R	4	3
12	18	3	R	14	24
13	11	1	L	1	0
13	11	1	L	3	4
13	11	1	L	14	35
13	11	2	R	1	0
13	11	2	R	4	3
13	11	2	R	14	27
13	11	3	L	1	0
13	11	3	L	5	7
13	11	3	L	8	10
13	11	3	L	4	23
13	11	3	L	11	90
13	11	3	L	1	110
13	11	3	L	3	118
13	11	3	L	14	234
13	12	1	L	1	0
13	12	1	L	4	4
13	12	1	L	7	80
13	12	1	L	3	104
13	12	1	L	14	121
13	12	2	R	1	0
13	12	2	R	4	4
13	12	2	R	14	36
13	12	3	L	1	0
13	12	3	L	5	7
13	12	3	L	8	13
13	12	3	L	4	25
13	12	3	L	7	101
13	12	3	L	3	133
13	12	3	L	14	203
13	13	1	L	1	0
13	13	1	L	3	5
13	13	1	L	14	31
13	13	2	R	1	0
13	13	2	R	4	6
13	13	2	R	14	32
13	13	3	R	1	0
13	13	3	R	4	5
13	13	3	R	14	15
13	14	1	L	1	0
13	14	1	L	3	8
13	14	1	L	14	51
13	14	2	R	1	0
13	14	2	R	3	5
13	14	2	R	11	60
13	14	2	R	1	87
13	14	2	R	4	90
13	14	2	R	14	121
13	14	3	R	1	0
13	14	3	R	4	5
13	14	3	R	14	33
13	15	1	L	1	0
13	15	1	L	3	27
13	15	1	L	14	69
13	15	2	R	1	0
13	15	2	R	4	16
13	15	2	R	14	46
13	15	3	L	1	0
13	15	3	L	3	9
13	15	3	L	14	32
13	17	1	L	1	0
13	17	1	L	3	16
13	17	1	L	14	77
13	17	2	R	1	0
13	17	2	R	3	3
13	17	2	R	6	37
13	17	2	R	5	48
13	17	2	R	8	52
13	17	2	R	5	68
13	17	2	R	8	78
13	17	2	R	3	87
13	17	2	R	6	149
13	17	2	R	5	184
13	17	2	R	8	195
13	17	2	R	4	206
13	17	2	R	14	238
13	17	3	R	1	0
13	17	3	R	3	2
13	17	3	R	6	17
13	17	3	R	10	27
13	17	3	R	1	45
13	17	3	R	10	58
13	17	3	R	1	75
13	17	3	R	4	78
13	17	3	R	14	93
13	18	1	L	1	0
13	18	1	L	4	3
13	18	1	L	11	60
13	18	1	L	1	82
13	18	1	L	4	85
13	18	1	L	11	120
13	18	1	L	1	150
13	18	1	L	4	156
13	18	1	L	11	170
13	18	1	L	1	192
13	18	1	L	5	218
13	18	1	L	8	234
13	18	1	L	3	261
13	18	1	L	14	284
13	18	2	L	1	0
13	18	2	L	3	4
13	18	2	L	14	17
13	18	3	R	1	0
13	18	3	R	3	14
13	18	3	R	11	30
13	18	3	R	1	50
13	18	3	R	3	71
13	18	3	R	11	90
13	18	3	R	1	104
13	18	3	R	5	107
13	18	3	R	8	112
13	18	3	R	10	132
13	18	3	R	1	152
13	18	3	R	4	157
13	18	3	R	14	206
14	11	1	R	1	0
14	11	1	R	4	4
14	11	1	R	14	29
14	11	2	R	1	0
14	11	2	R	4	5
14	11	2	R	14	22
14	11	3	L	1	0
14	11	3	L	5	3
14	11	3	L	8	7
14	11	3	L	3	18
14	11	3	L	14	35
14	12	1	L	1	0
14	12	1	L	4	7
14	12	1	L	7	52
14	12	1	L	5	75
14	12	1	L	8	78
14	12	1	L	3	91
14	12	1	L	14	137
14	12	2	L	1	0
14	12	2	L	4	5
14	12	2	L	11	40
14	12	2	L	1	78
14	12	2	L	4	102
14	12	2	L	7	160
14	12	2	L	5	179
14	12	2	L	8	183
14	12	2	L	3	202
14	12	2	L	14	253
14	12	3	R	1	0
14	12	3	R	3	5
14	12	3	R	14	36
14	13	1	R	1	0
14	13	1	R	4	4
14	13	1	R	14	47
14	13	2	R	1	0
14	13	2	R	4	5
14	13	2	R	14	46
14	13	3	L	1	0
14	13	3	L	3	6
14	13	3	L	14	24
14	14	1	R	1	0
14	14	1	R	3	7
14	14	1	R	6	64
14	14	1	R	5	97
14	14	1	R	8	102
14	14	1	R	10	129
14	14	1	R	1	156
14	14	1	R	3	168
14	14	1	R	11	220
14	14	1	R	1	245
14	14	1	R	4	252
14	14	1	R	14	267
14	14	2	R	1	0
14	14	2	R	4	3
14	14	2	R	14	55
14	14	3	L	1	0
14	14	3	L	4	4
14	14	3	L	11	60
14	14	3	L	1	90
14	14	3	L	5	95
14	14	3	L	8	99
14	14	3	L	5	146
14	14	3	L	8	149
14	14	3	L	4	163
14	14	3	L	11	200
14	14	3	L	1	240
14	14	3	L	5	248
14	14	3	L	8	255
14	14	3	L	10	268
14	14	3	L	1	281
14	14	3	L	3	294
14	14	3	L	14	329
14	15	1	L	1	0
14	15	1	L	4	6
14	15	1	L	11	80
14	15	1	L	1	96
14	15	1	L	3	117
14	15	1	L	14	186
14	15	2	R	1	0
14	15	2	R	4	3
14	15	2	R	14	17
14	15	3	R	1	0
14	15	3	R	3	13
14	15	3	R	11	60
14	15	3	R	1	90
14	15	3	R	3	116
14	15	3	R	11	160
14	15	3	R	1	195
14	15	3	R	10	215
14	15	3	R	1	230
14	15	3	R	3	243
14	15	3	R	11	300
14	15	3	R	1	315
14	15	3	R	3	340
14	15	3	R	11	375
14	15	3	R	1	400
14	15	3	R	3	412
14	15	3	R	6	435
14	15	3	R	3	441
14	15	3	R	11	480
14	15	3	R	1	510
14	15	3	R	4	562
14	15	3	R	14	596
14	17	1	R	1	0
14	17	1	R	3	41
14	17	1	R	6	54
14	17	1	R	5	61
14	17	1	R	8	68
14	17	1	R	4	84
14	17	1	R	14	109
14	17	2	R	1	0
14	17	2	R	4	4
14	17	2	R	14	24
14	17	3	R	1	0
14	17	3	R	4	11
14	17	3	R	14	24
14	18	1	R	1	0
14	18	1	R	3	11
14	18	1	R	11	80
14	18	1	R	1	110
14	18	1	R	4	124
14	18	1	R	14	177
14	18	2	L	1	0
14	18	2	L	4	4
14	18	2	L	11	40
14	18	2	L	1	60
14	18	2	L	5	64
14	18	2	L	8	68
14	18	2	L	3	88
14	18	2	L	14	114
14	18	3	R	1	0
14	18	3	R	4	10
14	18	3	R	14	64
15	11	1	L	1	0
15	11	1	L	10	10
15	11	1	L	1	25
15	11	1	L	4	27
15	11	1	L	7	114
15	11	1	L	4	134
15	11	1	L	2	143
15	11	1	L	1	218
15	11	1	L	3	251
15	11	1	L	14	279
15	11	2	L	1	0
15	11	2	L	5	3
15	11	2	L	8	10
15	11	2	L	3	17
15	11	2	L	14	26
15	11	3	L	1	0
15	11	3	L	2	39
15	11	3	L	1	97
15	11	3	L	4	104
15	11	3	L	7	108
15	11	3	L	3	115
15	11	3	L	14	154
15	12	1	L	1	0
15	12	1	L	2	16
15	12	1	L	1	27
15	12	1	L	3	33
15	12	1	L	14	126
15	12	2	R	1	0
15	12	2	R	3	5
15	12	2	R	6	12
15	12	2	R	4	39
15	12	2	R	14	62
15	12	3	L	1	0
15	12	3	L	3	2
15	12	3	L	14	19
15	13	1	R	1	0
15	13	1	R		29
15	13	1	R	14	64
15	13	2	R	1	0
15	13	2	R	5	14
15	13	2	R	8	18
15	13	2	R	4	28
15	13	2	R	14	57
15	13	3	R	1	0
15	13	3	R	5	8
15	13	3	R	8	16
15	13	3	R	4	22
15	13	3	R	14	34
15	14	1	R	1	0
15	14	1	R	3	8
15	14	1	R	11	130
15	14	1	R	1	160
15	14	1	R	3	170
15	14	1	R	6	216
15	14	1	R	5	249
15	14	1	R	8	252
15	14	1	R	4	266
15	14	1	R	14	325
15	14	2	R	1	0
15	14	2	R	4	6
15	14	2	R	14	165
15	14	3	L	1	0
15	14	3	L	5	5
15	14	3	L	8	10
15	14	3	L	3	18
15	14	3	L	14	46
15	15	1	R	1	0
[truncated: 5,089 more rows]

## Sheet: definitions
session	Training sessions from 1 to 96
snake	Snake ID	snakes 1-10 are cohort 1, snakes 11-18 are cohort 2
trial
correct	Which tunnel, left or right, displayed that snake's reinforced cue
event	1	Entered arena
	2	Exited arena through entrance, reintroduced to arena
	3	Entered left tunnel
	4	Entered right tunnel
	5	Entered middle tunnel no reinforcement)
	6	Exited left tunnel
	7	Exited right tunnel
	8	Exited middle tunnel
	10	Exited over top of arena
	11	removed from non-reinforced tunnel by experimenter
	14	Began swallowing pinky mouse; 1000 means moouse was not eaten
time	Duration of trial up until that point, in seconds

## Sheet: expt 1 trial errors
session	snake	trial	correct	event	time	cumul.trial	errors.per.trial	tries.until.success
1	1	1	L	3	10	1	0	1
1	1	2	R	4	403	2	3	4
1	1	3	L	3	75	3	0	1
2	1	1	R	4	7	4	0	1
2	1	2	L	3	8	5	0	1
2	1	3	R	4	139	6	1	2
3	1	2	L	3	6	7	0	1
3	1	3	L	3	7	8	0	1
3	1	4	R	4	139	9	1	2
4	1	1	L	3	62	10	1	2
4	1	2	L	3	8	11	0	1
4	1	3	L	3	79	12	1	2
4	1	4	L	3	17	13	0	1
6	1	1	L	3	4	14	0	1
6	1	2	L	3	6	15	0	1
6	1	3	L	3	71	16	2	3
6	1	4	R	4	5	17	0	1
7	1	1	L	3	47	18	1	2
7	1	2	R	4	4	19	0	1
7	1	3	L	3	5	20	0	1
7	1	4	L	3	8	21	0	1
8	1	1	L	3	4	22	0	1
8	1	2	L	3	317	23	3	4
8	1	3	R	4	97	24	1	2
8	1	4	R	4	3	25	0	1
9	1	1	R	4	78	26	1	2
9	1	2	R	4	110	27	1	2
9	1	3	L	3	5	28	0	1
9	1	4	R	4	3	29	0	1
10	1	1	L	3	245	30	1	2
10	1	2	R	4	143	31	0	1
10	1	3	L	3	120	32	1	2
10	1	4	R	4	116	33	1	2
11	1	1	L	3	4	34	0	1
11	1	2	R	4	34	35	0	1
11	1	3	R	4	108	36	1	2
11	1	4	R	4	4	37	0	1
12	1	1	L	3	73	38	1	2
12	1	2	L	3	33	39	0	1
12	1	3	L	3	90	40	1	2
12	1	4	L	3	146	41	2	3
13	1	1	L	3	65	42	1	2
13	1	2	R	4	100	43	1	2
13	1	3	L	3	3	44	0	1
13	1	4	R	4	104	45	1	2
14	1	1	L	3	52	46	1	2
14	1	2	R	4	4	47	0	1
14	1	3	L	3	2	48	0	1
14	1	4	L	3	3	49	0	1
15	1	1	L	3	7	50	0	1
15	1	2	L	3	418	51	2	3
15	1	3	L	3	242	52	3	4
15	1	4	L	3	57	53	0	1
16	1	1	R	4	2	54	0	1
16	1	2	R	4	3	55	0	1
16	1	3	L	3	77	56	1	2
16	1	4	R	4	84	57	1	2
17	1	1	R	4	3	58	0	1
17	1	2	R	4	6	59	0	1
17	1	3	R	4	3	60	0	1
17	1	4	R	4	122	61	2	3
18	1	1	R	4	118	62	2	3
18	1	2	R	4	6	63	0	1
18	1	3	R	4	5	64	0	1
18	1	4	L	3	4	65	0	1
19	1	1	R	4	3	66	0	1
19	1	2	L	3	3	67	0	1
19	1	3	L	3	4	68	0	1
19	1	4	R	4	4	69	0	1
20	1	1	L	3	2	70	0	1
20	1	2	R	4	4	71	0	1
20	1	3	L	3	3	72	0	1
20	1	4	R	4	2	73	0	1
21	1	1	L	3	12	74	1	2
21	1	2	R	4	3	75	0	1
21	1	3	R	4	2	76	0	1
21	1	4	L	3	5	77	0	1
22	1	1	R	4	2	78	0	1
22	1	2	R	4	3	79	0	1
22	1	3	L	3	4	80	0	1
22	1	4	R	4	3	81	0	1
23	1	1	L	3	4	82	0	1
23	1	2	L	3	59	83	1	2
23	1	3	R	4	3	84	0	1
23	1	4	R	4	4	85	0	1
24	1	1	L	3	2	86	0	1
24	1	2	R	4	12	87	0	1
24	1	3	L	3	20	88	0	1
24	1	4	L	3	4	89	0	1
25	1	1	L	3	5	90	0	1
25	1	2	L	3	83	91	1	2
25	1	3	R	4	2	92	0	1
25	1	4	R	4	41	93	1	2
26	1	1	R	4	3	94	0	1
26	1	2	R	4	46	95	1	2
26	1	3	R	4	3	96	0	1
26	1	4	L	3	4	97	0	1
27	1	1	R	4	2	98	0	1
27	1	2	R	4	2	99	0	1
27	1	3	L	3	3	100	0	1
27	1	4	R	4	4	101	0	1
28	1	1	L	3	2	102	0	1
28	1	2	L	3	3	103	0	1
28	1	3	R	4	3	104	0	1
28	1	4	R	4	5	105	0	1
29	1	1	R	4	2	106	0	1
29	1	2	R	4	2	107	0	1
29	1	3	R	4	3	108	0	1
29	1	4	L	3	3	109	0	1
30	1	1	L	3	3	110	0	1
30	1	2	R	4	3	111	0	1
30	1	3	R	4	2	112	0	1
30	1	4	R	4	2	113	0	1
31	1	1	L	3	2	114	0	1
31	1	2	L	3	2	115	0	1
31	1	3	L	3	3	116	0	1
31	1	4	R	4	2	117	0	1
32	1	1	L	3	2	118	0	1
32	1	2	L	3	96	119	2	3
32	1	3	L	3	8	120	0	1
32	1	4	L	3	4	121	0	1
33	1	1	R	4	2	122	0	1
33	1	2	L	3	3	123	0	1
33	1	3	R	4	2	124	0	1
33	1	4	R	4	8	125	0	1
34	1	1	R	4	2	126	0	1
34	1	2	R	4	40	127	1	2
34	1	3	R	4	3	128	0	1
34	1	4	L	3	3	129	0	1
35	1	1	R	4	2	130	0	1
35	1	2	R	4	5	131	0	1
35	1	3	R	4	11	132	0	1
35	1	4	R	4	5	133	0	1
36	1	1	R	4	2	134	0	1
36	1	2	R	4	3	135	0	1
36	1	3	R	4	2	136	0	1
36	1	4	L	3	5	137	0	1
37	1	1	R	4	2	138	0	1
37	1	2	R	4	2	139	0	1
37	1	3	L	3	5	140	0	1
37	1	4	L	3	8	141	0	1
38	1	1	R	4	5	142	0	1
38	1	2	R	4	26	143	0	1
38	1	3	L	3	49	144	0	1
38	1	4	R	4	128	145	1	2
39	1	1	R	4	2	146	0	1
39	1	2	R	4	7	147	0	1
39	1	3	L	3	3	148	0	1
39	1	4	R	4	2	149	0	1
40	1	1	L	3	27	150	0	1
40	1	2	L	3	5	151	0	1
40	1	3	R	4	15	152	0	1
40	1	4	R	4	7	153	0	1
41	1	1	R	4	11	154	0	1
41	1	2	R	4	2	155	0	1
41	1	3	R	4	2	156	0	1
41	1	4	L	3	2	157	0	1
42	1	1	L	3	5	158	0	1
42	1	2	R	4	2	159	0	1
42	1	3	R	4	2	160	0	1
42	1	4	R	4	2	161	0	1
43	1	1	R	4	137	162	2	3
43	1	2	R	4	64	163	1	2
43	1	3	L	3	266	164	4	5
43	1	4	R	4	74	165	1	2
44	1	1	L	3	10	166	0	1
44	1	2	L	3	6	167	0	1
44	1	3	R	4	105	168	0	1
45	1	1	R	4	94	170	1	2
45	1	2	R	4	19	171	0	1
45	1	3	R	4	51	172	1	2
45	1	4	L	3	7	173	0	1
46	1	1	L	3	3	174	0	1
46	1	2	R	4	2	175	0	1
46	1	3	R	4	48	176	1	2
46	1	4	R	4	2	177	0	1
48	1	1	L	3	5	178	0	1
48	1	2	R	4	10	179	0	1
48	1	3	L	3	2	180	0	1
48	1	4	R	4	3	181	0	1
49	1	1	R	4	15	182	0	1
49	1	2	R	4	108	183	1	2
49	1	3	L	3	76	184	0	1
49	1	4	L	3	3	185	0	1
50	1	1	R	4	8	186	0	1
50	1	2	L	3	2	187	0	1
50	1	3	R	4	4	188	0	1
50	1	4	L	3	227	189	2	3
51	1	1	R	4	66	190	1	2
51	1	2	L	3	34	191	1	2
51	1	3	L	3	4	192	0	1
51	1	4	R	4	2	193	0	1
54	1	1	R	4	2	194	0	1
54	1	2	L	3	3	195	0	1
54	1	3	L	3	49	196	0	1
54	1	4	R	4	3	197	0	1
55	1	1	L	3	255	198	1	2
55	1	2	L	3	303	199	2	3
55	1	3	L	3	217	200	2	3
55	1	4	R	4	9	201	0	1
56	1	1	R	4	98	202	1	2
56	1	2	L	3	27	203	0	1
56	1	3	L	3	113	204	0	1
56	1	4	R	4	9	205	0	1
57	1	1	R	4	8	206	0	1
57	1	2	L	3	56	207	1	2
57	1	3	R	4	8	208	0	1
57	1	4	R	4	7	209	0	1
58	1	1	R	4	67	210	1	2
58	1	2	L	3	2	211	0	1
58	1	3	L	3	118	212	1	2
58	1	4	R	4	2	213	0	1
59	1	1	L	3	2	214	0	1
59	1	2	R	4	2	215	0	1
59	1	3	L	3	4	216	0	1
59	1	4	L	3	3	217	0	1
60	1	1	L	3	2	218	0	1
60	1	2	R	4	3	219	0	1
60	1	3	R	4	5	220	0	1
60	1	4	L	3	2	221	0	1
61	1	1	R	4	2	222	0	1
61	1	2	R	4	16	223	0	1
61	1	3	L	3	68	224	1	2
61	1	4	R	4	3	225	0	1
62	1	1	R	4	2	226	0	1
62	1	2	R	4	3	227	0	1
62	1	3	L	3	82	228	1	2
62	1	4	R	4	60	229	1	2
63	1	1	L	3	81	230	1	2
63	1	2	L	3	143	231	2	3
63	1	3	R	4	8	232	0	1
63	1	4	R	4	5	233	0	1
65	1	1	L	3	3	234	0	1
65	1	2	R	4	3	235	0	1
65	1	3	L	3	5	236	0	1
65	1	4	R	4	51	237	1	2
66	1	1	L	3	4	238	0	1
66	1	2	L	3	7	239	0	1
66	1	3	R	4	3	240	0	1
66	1	4	L	3	3	241	0	1
67	1	1	L	3	3	242	0	1
67	1	2	L	3	4	243	0	1
67	1	3	R	4	13	244	0	1
67	1	4	L	3	3	245	0	1
68	1	1	L	3	3	246	0	1
68	1	2	R	4	19	247	1	2
68	1	3	L	3	62	248	1	2
68	1	4	R	4	3	249	0	1
69	1	1	R	4	51	250	1	2
69	1	2	L	3	3	251	0	1
69	1	3	R	4	109	252	2	3
69	1	4	R	4	4	253	0	1
70	1	1	L	3	4	254	0	1
70	1	2	R	4	3	255	0	1
70	1	3	L	3	3	256	0	1
70	1	4	L	3	33	257	0	1
71	1	1	R	4	3	258	0	1
71	1	2	L	3	3	259	0	1
71	1	3	R	4	4	260	0	1
71	1	4	R	4	3	261	0	1
73	1	1	L	3	3	262	0	1
73	1	2	R	4	79	263	1	2
73	1	3	R	4	5	264	0	1
73	1	4	L	3	3	265	0	1
74	1	1	R	4	63	266	1	2
74	1	2	L	3	4	267	0	1
74	1	3	R	4	3	268	0	1
74	1	4	L	3	3	269	0	1
75	1	1	R	4	3	270	0	1
75	1	2	L	3	60	271	1	2
75	1	3	L	3	83	272	1	2
75	1	4	R	4	3	273	0	1
76	1	1	L	3	3	274	0	1
76	1	2	R	4	4	275	0	1
76	1	3	L	3	3	276	0	1
76	1	4	L	3	54	277	1	2
77	1	1	R	4	3	278	0	1
77	1	2	L	3	8	279	0	1
77	1	3	R	4	66	280	1	2
77	1	4	R	4	4	281	0	1
78	1	1	L	3	3	282	0	1
78	1	2	L	3	179	283	1	2
78	1	3	R	4	59	284	1	2
78	1	4	L	3	44	285	1	2
79	1	1	L	3	55	286	1	2
79	1	2	L	3	3	287	0	1
79	1	3	L	3	48	288	1	2
79	1	4	L	3	3	289	0	1
80	1	1	L	3	4	290	0	1
80	1	2	R	4	57	291	1	2
80	1	3	R	4	4	292	0	1
80	1	4	L	3	3	293	0	1
81	1	1	R	4	3	294	0	1
81	1	2	R	4	3	295	0	1
81	1	3	R	4	4	296	0	1
81	1	4	R	4	56	297	1	2
82	1	1	R	4	4	298	0	1
82	1	2	R	4	56	299	0	1
82	1	3	R	4	3	300	0	1
82	1	4	L	3	34	301	0	1
83	1	1	L	3	61	302	1	2
83	1	2	L	3	4	303	0	1
83	1	3	L	3	6	304	0	1
83	1	4	R	4	5	305	0	1
84	1	1	R	4	49	306	1	2
84	1	2	L	3	5	307	0	1
84	1	3	L	3	3	308	0	1
84	1	4	R	4	4	309	0	1
85	1	1	R	4	5	310	0	1
85	1	2	R	4	4	311	0	1
85	1	3	R	4	3	312	0	1
85	1	4	R	4	7	313	0	1
86	1	1	L	3	3	314	0	1
86	1	2	R	4	5	315	0	1
86	1	3	R	4	4	316	0	1
86	1	4	L	3	4	317	0	1
87	1	1	R	4	3	318	0	1
87	1	2	L	3	3	319	0	1
87	1	3	R	4	4	320	0	1
87	1	4	R	4	3	321	0	1
88	1	1	L	3	3	322	0	1
88	1	2	L	3	4	323	0	1
88	1	3	R	4	3	324	0	1
88	1	4	L	3	4	325	0	1
89	1	1	L	3	5	326	0	1
89	1	2	L	3	7	327	0	1
89	1	3	R	4	6	328	0	1
89	1	4	R	4	4	329	0	1
90	1	1	R	4	5	330	0	1
90	1	2	L	3	4	331	0	1
90	1	3	L	3	3	332	0	1
90	1	4	R	4	4	333	0	1
91	1	1	L	3	5	334	0	1
91	1	2	L	3	9	335	0	1
91	1	3	R	4	4	336	0	1
91	1	4	R	4	11	337	0	1
92	1	1	L	3	68	338	1	2
92	1	2	L	3	4	339	0	1
92	1	3	R	4	4	340	0	1
92	1	4	L	3	5	341	0	1
94	1	1	L	3	4	342	0	1
94	1	2	L	3	5	343	0	1
94	1	3	R	4	4	344	0	1
94	1	4	L	3	4	345	0	1
95	1	1	L	3	22	346	0	1
95	1	2	R	4	17	347	0	1
95	1	3	L	3	5	348	0	1
95	1	4	R	4	4	349	0	1
1	2	1	L	3	21	1	0	1
1	2	2	L	3	285	2	0	1
1	2	3	L	3	24	3	0	1
2	2	1	L	3	341	4	2	3
2	2	2	R	4	9	5	0	1
2	2	3	L	3	132	6	1	2
2	2	4	L	3	128	7	2	3
3	2	1	R	4	12	8	0	1
3	2	2	R	4	7	9	0	1
3	2	3	R	4	307	10	2	3
3	2	4	L	3	276	11	1	2
4	2	1	L	3	32	12	0	1
4	2	2	L	3	97	13	0	1
4	2	3	L	3	76	14	0	1
4	2	4	L	3	84	15	0	1
6	2	1	R	4	35	16	0	1
6	2	2	L	3	11	17	0	1
6	2	3	R	4	23	18	0	1
6	2	4	L	3	5	19	0	1
7	2	1	R	4	134	20	2	3
7	2	2	L	3	259	21	3	4
7	2	3	L	3	64	22	2	3
7	2	4	R	4	181	23	1	2
8	2	1	L	3	159	24	1	2
8	2	2	R	4	94	25	1	2
8	2	3	R	4	143	26	1	2
8	2	4	L	3	9	27	0	1
9	2	1	L	3	6	28	0	1
9	2	2	L	3	6	29	0	1
9	2	3	R	4	17	30	0	1
9	2	4	L	3	7	31	0	1
10	2	1	L	3	18	32	0	1
10	2	2	R	4	166	33	1	2
10	2	3	L	3	91	34	0	1
10	2	4	L	3	167	35	3	4
11	2	1	R	4	17	36	0	1
11	2	2	R	4	6	37	0	1
11	2	3	R	4	394	38	3	4
11	2	4	R	4	71	39	0	1
12	2	1	L	3	121	40	1	2
12	2	2	L	3	124	41	1	2
12	2	3	R	4	3	42	0	1
12	2	4	R	4	14	43	0	1
13	2	1	L	3	60	44	1	2
13	2	2	R	4	40	45	0	1
13	2	3	L	3	135	46	2	3
13	2	4	L	3	195	47	2	3
14	2	1	L	3	201	48	3	4
14	2	2	R	4	9	49	0	1
14	2	3	L	3	9	50	0	1
14	2	4	R	4	11	51	0	1
15	2	1	R	4	5	52	0	1
15	2	2	R	4	4	53	0	1
15	2	3	R	4	6	54	0	1
15	2	4	R	4	270	55	2	3
16	2	1	L	3	3	56	0	1
16	2	2	R	4	66	57	1	2
16	2	3	L	3	3	58	0	1
16	2	4	R	4	53	59	1	2
17	2	1	L	3	18	60	0	1
17	2	2	R	4	205	61	3	4
17	2	3	R	4	7	62	0	1
17	2	4	R	4	5	63	0	1
18	2	1	L	3	14	64	0	1
18	2	2	R	4	48	65	1	2
18	2	3	L	3	53	66	1	2
18	2	4	R	4	6	67	0	1
19	2	1	R	4	8	68	0	1
19	2	2	R	4	72	69	1	2
19	2	3	R	4	7	70	0	1
19	2	4	L	3	155	71	2	3
20	2	1	R	4	3	72	0	1
20	2	2	R	4	18	73	0	1
20	2	3	R	4	6	74	0	1
20	2	4	L	3	6	75	0	1
21	2	1	L	3	140	76	0	1
21	2	2	L	3	4	77	0	1
21	2	3	R	4	3	78	0	1
21	2	4	L	3	6	79	0	1
22	2	1	L	3	7	80	0	1
22	2	2	R	4	37	81	0	1
22	2	3	L	3	64	82	1	2
22	2	4	R	4	3	83	0	1
23	2	1	L	3	4	84	0	1
23	2	2	L	3	3	85	0	1
23	2	3	R	4	2	86	0	1
23	2	4	R	4	4	87	0	1
24	2	1	L	3	4	88	0	1
24	2	2	R	4	4	89	0	1
24	2	3	L	3	4	90	0	1
24	2	4	L	3	2	91	0	1
25	2	1	L	3	36	92	0	1
25	2	2	L	3	146	93	1	2
25	2	3	R	4	36	94	0	1
25	2	4	R	4	2	95	0	1
26	2	1	L	3	3	96	0	1
26	2	2	R	4	4	97	0	1
26	2	3	R	4	4	98	0	1
26	2	4	L	3	3	99	0	1
27	2	1	L	3	4	100	0	1
27	2	2	R	4	3	101	0	1
27	2	3	L	3	3	102	0	1
27	2	4	L	3	22	103	0	1
28	2	1	L	3	47	104	0	1
28	2	2	L	3	5	105	0	1
28	2	3	R	4	10	106	0	1
28	2	4	R	4	57	107	1	2
29	2	1	L	3	3	108	0	1
29	2	2	R	4	5	109	0	1
29	2	3	R	4	4	110	0	1
29	2	4	L	3	4	111	0	1
30	2	1	L	3	3	112	0	1
30	2	2	L	3	4	113	0	1
30	2	3	R	4	6	114	0	1
30	2	4	R	4	5	115	0	1
31	2	1	L	3	15	116	0	1
31	2	2	L	3	6	117	0	1
31	2	3	R	4	6	118	0	1
31	2	4	L	3	14	119	0	1
32	2	1	R	4	2	120	0	1
32	2	2	L	3	5	121	0	1
32	2	3	L	3	8	122	0	1
32	2	4	L	3	2	123	0	1
33	2	1	R	4	5	124	0	1
33	2	2	R	4	3	125	0	1
33	2	3	L	3	3	126	0	1
33	2	4	R	4	2	127	0	1
34	2	1	R	4	5	128	0	1
34	2	2	L	3	3	129	0	1
34	2	3	L	3	5	130	0	1
34	2	4	L	3	24	131	0	1
35	2	1	L	3	10	132	0	1
35	2	2	L	3	3	133	0	1
35	2	3	L	3	13	134	0	1
35	2	4	R	4	139	135	1	2
36	2	1	L	3	11	136	0	1
36	2	2	R	4	8	137	0	1
36	2	3	L	3	5	138	0	1
36	2	4	L	3	3	139	0	1
37	2	1	L	3	11	140	0	1
37	2	2	L	3	47	141	0	1
37	2	3	L	3	36	142	0	1
37	2	4	R	4	3	143	0	1
38	2	1	L	3	29	144	0	1
38	2	2	L	3	94	145	0	1
38	2	3	L	3	28	146	0	1
38	2	4	R	4	6	147	0	1
39	2	1	L	3	2	148	0	1
39	2	2	R	4	5	149	0	1
39	2	3	L	3	2	150	0	1
39	2	4	L	3	3	151	0	1
40	2	1	L	3	3	152	0	1
40	2	2	L	3	17	153	0	1
40	2	3	R	4	36	154	0	1
40	2	4	R	4	6	155	0	1
41	2	1	L	3	4	156	0	1
41	2	2	R	4	23	157	0	1
41	2	3	R	4	5	158	0	1
41	2	4	L	3	5	159	0	1
42	2	1	L	3	5	160	0	1
42	2	2	L	3	5	161	0	1
42	2	3	R	4	3	162	0	1
42	2	4	R	4	4	163	0	1
43	2	1	L	3	163	164	3	4
43	2	2	R	4	146	165	2	3
43	2	3	L	3	235	166	4	5
43	2	4	L	3	21	167	0	1
44	2	1	L	3	111	168	2	3
44	2	2	L	3	2	169	0	1
44	2	3	R	4	4	170	0	1
44	2	4	R	4	38	171	1	2
45	2	1	L	3	77	172	1	2
45	2	2	R	4	84	173	1	2
45	2	3	R	4	14	174	0	1
45	2	4	L	3	3	175	0	1
46	2	1	L	3	22	176	0	1
46	2	2	L	3	2	177	0	1
46	2	3	R	4	5	178	0	1
46	2	4	R	4	5	179	0	1
48	2	1	R	4	63	180	1	2
48	2	2	L	3	5	181	0	1
48	2	3	L	3	45	182	1	2
48	2	4	L	3	2	183	0	1
49	2	1	L	3	101	184	1	2
49	2	2	L	3	15	185	0	1
49	2	3	R	4	2	186	0	1
49	2	4	L	3	6	187	0	1
50	2	1	L	3	78	188	1	2
50	2	2	L	3	130	189	1	2
50	2	3	R	4	59	190	1	2
50	2	4	R	4	4	191	0	1
51	2	1	L	3	133	192	2	3
51	2	2	R	4	5	193	0	1
51	2	3	L	3	108	194	1	2
51	2	4	R	4	3	195	0	1
52	2	1	R	4	4	196	0	1
52	2	2	R	4	9	197	0	1
52	2	3	L	3	3	198	0	1
52	2	4	R	4	12	199	0	1
53	2	1	L	3	103	200	1	2
53	2	2	R	4	2	201	0	1
53	2	3	R	4	5	202	0	1
53	2	4	L	3	3	203	0	1
55	2	1	R	4	287	204	1	2
55	2	2	L	3	365	205	2	3
55	2	3	L	3	79	206	1	2
55	2	4	L	3	115	207	1	2
57	2	1	L	3	39	208	0	1
57	2	2	L	3	21	209	0	1
57	2	3	L	3	19	210	0	1
57	2	4	R	4	185	211	1	2
58	2	1	L	3	5	212	0	1
58	2	2	R	4	62	213	0	1
58	2	3	L	3	3	214	0	1
58	2	4	L	3	74	215	1	2
59	2	1	L	3	4	216	0	1
59	2	2	R	4	2	217	0	1
59	2	3	L	3	67	218	1	2
59	2	4	L	3	3	219	0	1
60	2	1	R	4	16	220	0	1
60	2	2	L	3	3	221	0	1
60	2	3	R	4	4	222	0	1
60	2	4	L	3	3	223	0	1
61	2	1	R	4	88	224	1	2
61	2	2	L	3	11	225	0	1
61	2	3	L	3	109	226	1	2
61	2	4	L	3	8	227	0	1
62	2	1	L	3	5	228	0	1
62	2	2	R	4	58	229	1	2
62	2	3	L	3	96	230	1	2
62	2	4	L	3	6	231	0	1
63	2	1	L	3	82	232	1	2
63	2	2	L	3	5	233	0	1
63	2	3	R	4	3	234	0	1
63	2	4	R	4	150	235	2	3
64	2	1	L	3	9	236	0	1
64	2	2	R	4	59	237	1	2
64	2	3	R	4	11	238	0	1
64	2	4	L	3	31	239	1	2
65	2	1	R	4	4	240	0	1
65	2	2	L	3	67	241	1	2
65	2	3	L	3	4	242	0	1
65	2	4	L	3	7	243	0	1
66	2	1	R	4	60	244	1	2
66	2	2	R	4	5	245	0	1
66	2	3	R	4	3	246	0	1
66	2	4	R	4	8	247	0	1
67	2	1	L	3	87	248	1	2
67	2	2	R	4	3	249	0	1
67	2	3	R	4	8	250	0	1
67	2	4	L	3	57	251	1	2
69	2	1	R	4	3	252	0	1
69	2	2	L	3	3	253	0	1
69	2	3	R	4	65	254	1	2
69	2	4	R	4	8	255	0	1
70	2	1	L	3	3	256	0	1
70	2	2	L	3	5	257	0	1
70	2	3	L	3	3	258	0	1
70	2	4	L	3	7	259	0	1
71	2	1	L	3	3	260	0	1
71	2	2	L	3	2	261	0	1
71	2	3	R	4	67	262	1	2
71	2	4	L	3	5	263	0	1
72	2	1	L	3	5	264	0	1
72	2	2	L	3	4	265	0	1
72	2	3	R	4	7	266	0	1
72	2	4	L	3	3	267	0	1
73	2	1	L	3	3	268	0	1
73	2	2	L	3	54	269	1	2
73	2	3	R	4	4	270	0	1
73	2	4	R	4	5	271	0	1
74	2	1	R	4	134	272	0	1
74	2	2	L	3	197	273	3	4
74	2	3	R	4	64	274	1	2
74	2	4	R	4	4	275	0	1
75	2	1	R	4	3	276	0	1
75	2	2	R	4	73	277	1	2
75	2	3	R	4	44	278	0	1
75	2	4	R	4	106	279	1	2
76	2	1	L	3	66	280	1	2
76	2	2	L	3	53	281	0	1
76	2	3	R	4	55	282	1	2
76	2	4	L	3	4	283	0	1
77	2	1	R	4	3	284	0	1
77	2	2	L	3	73	285	1	2
77	2	3	L	3	137	286	2	3
77	2	4	L	3	89	287	1	2
78	2	1	L	3	58	288	0	1
78	2	2	L	3	96	289	0	1
78	2	3	L	3	162	290	2	3
78	2	4	R	4	4	291	0	1
79	2	1	L	3	12	292	0	1
79	2	2	L	3	7	293	0	1
79	2	3	R	4	4	294	0	1
79	2	4	L	3	64	295	1	2
81	2	1	L	3	34	296	0	1
81	2	2	L	3	5	297	0	1
81	2	3	R	4	3	298	0	1
81	2	4	L	3	103	299	1	2
82	2	1	R	4	48	300	0	1
82	2	2	R	4	4	301	0	1
82	2	3	R	4	3	302	0	1
82	2	4	R	4	11	303	0	1
83	2	1	R	4	4	304	0	1
83	2	2	R	4	4	305	0	1
83	2	3	R	4	5	306	0	1
83	2	4	L	3	8	307	0	1
84	2	1	L	3	67	308	1	2
84	2	2	R	4	102	309	0	1
84	2	3	L	3	4	310	1	2
85	2	1	L	3	5	312	0	1
85	2	2	R	4	9	313	0	1
85	2	3	L	3	7	314	0	1
85	2	4	L	3	4	315	0	1
86	2	1	R	4	4	316	0	1
86	2	2	L	3	4	317	0	1
86	2	3	R	4	9	318	0	1
86	2	4	L	3	5	319	0	1
87	2	1	L	3	4	320	0	1
87	2	2	L	3	5	321	0	1
87	2	3	R	4	8	322	0	1
87	2	4	R	4	4	323	0	1
88	2	1	R	4	4	324	0	1
88	2	2	R	4	64	325	1	2
88	2	3	L	3	79	326	1	2
88	2	4	L	3	8	327	0	1
90	2	1	R	4	5	328	0	1
90	2	2	L	3	4	329	0	1
90	2	3	L	3	23	330	0	1
90	2	4	R	4	4	331	0	1
91	2	1	L	3	4	332	0	1
91	2	2	L	3	28	333	0	1
91	2	3	R	4	7	334	0	1
91	2	4	R	4	18	335	0	1
92	2	1	R	4	5	336	0	1
92	2	2	L	3	4	337	0	1
92	2	3	R	4	5	338	0	1
92	2	4	L	3	7	339	0	1
93	2	1	L	3	3	340	0	1
93	2	2	R	4	4	341	0	1
93	2	3	R	4	4	342	0	1
93	2	4	L	3	3	343	0	1
94	2	1	R	4	4	344	0	1
94	2	2	R	4	4	345	0	1
94	2	3	L	3	4	346	0	1
94	2	4	L	3	5	347	0	1
95	2	1	R	4	5	348	0	1
95	2	2	R	4	4	349	0	1
95	2	3	L	3	5	350	0	1
95	2	4	L	3	4	351	0	1
96	2	1	L	3	56	352	1	2
96	2	2	L	3	5	353	0	1
96	2	3	R	4	4	354	0	1
96	2	4	L	3	5	355	0	1
1	3	1	R	4	8	1	0	1
1	3	2	R	4	255	2	3	4
1	3	3	L	3	67	3	1	2
2	3	1	r	4	12	4	0	1
2	3	3	L	3	221	5	0	1
2	3	4	L	3	99	6	2	3
3	3	1	r	4	6	8	0	1
3	3	2	R	4	5	9	0	1
3	3	3	R	4	5	10	0	1
5	3	1	L	3	339	12	2	3
5	3	2	R	4	8	13	0	1
5	3	3	L	3	6	14	0	1
5	3	4	R	4	8	15	0	1
7	3	1	L	3	92	16	0	1
7	3	2	L	3	88	17	2	3
7	3	3	R	4	36	18	1	2
7	3	4	L	3	43	19	1	2
8	3	1	R	4	6	20	0	1
8	3	2	R	4	66	21	1	2
8	3	3	L	3	127	22	2	3
8	3	4	R	4	11	23	0	1
9	3	1	L	3	105	24	2	3
9	3	2	L	3	72	25	1	2
9	3	3	L	3	5	26	0	1
9	3	4	L	3	5	27	0	1
10	3	1	L	3	254	28	2	3
10	3	2	R	4	397	29	3	4
10	3	3	L	3	76	30	1	2
10	3	4	R	4	189	31	4	5
11	3	1	R	4	439	32	4	5
11	3	2	R	4	142	33	2	3
11	3	3	L	3	4	34	0	1
11	3	4	R	4	3	35	0	1
12	3	1	R	4	59	36	1	2
12	3	2	R	4	228	37	2	3
12	3	3	R	4	13	38	0	1
12	3	4	R	4	12	39	0	1
13	3	1	L	3	7	40	0	1
13	3	2	L	3	6	41	0	1
13	3	3	R	4	3	42	0	1
13	3	4	R	4	2	43	0	1
14	3	1	R	4	120	44	1	2
14	3	2	R	4	101	45	1	2
14	3	3	L	3	146	46	2	3
14	3	4	L	3	105	47	1	2
15	3	1	L	3	7	48	0	1
15	3	2	L	3	73	49	1	2
15	3	3	R	4	3	50	0	1
15	3	4	R	4	3	51	0	1
16	3	1	R	4	63	52	1	2
16	3	2	R	4	3	53	0	1
16	3	3	R	4	3	54	0	1
16	3	4	L	3	59	55	0	1
17	3	1	L	3	104	56	1	2
17	3	2	L	3	86	57	1	2
17	3	3	L	3	104	58	2	3
17	3	4	L	3	3	59	0	1
18	3	1	L	3	58	60	1	2
18	3	2	R	4	3	61	0	1
18	3	3	L	3	4	62	0	1
18	3	4	L	3	13	63	0	1
19	3	1	R	4	93	64	1	2
19	3	2	L	3	3	65	0	1
19	3	3	R	4	3	66	0	1
19	3	4	L	3	6	67	0	1
20	3	1	R	4	2	68	0	1
20	3	2	R	4	117	69	2	3
20	3	3	R	4	4	70	0	1
20	3	4	R	4	4	71	0	1
21	3	1	L	3	4	72	0	1
21	3	2	R	4	3	73	0	1
21	3	3	L	3	4	74	0	1
21	3	4	R	4	6	75	0	1
22	3	1	L	3	3	76	0	1
22	3	2	R	4	3	77	0	1
22	3	3	L	3	4	78	0	1
22	3	4	L	3	2	79	0	1
23	3	1	L	3	82	80	1	2
23	3	2	R	4	3	81	0	1
23	3	3	R	4	3	82	0	1
23	3	4	L	3	2	83	0	1
24	3	1	R	4	4	84	0	1
24	3	2	L	3	8	85	0	1
24	3	3	R	4	3	86	0	1
24	3	4	L	3	2	87	0	1
25	3	1	L	3	3	88	0	1
25	3	2	R	4	4	89	0	1
25	3	3	R	4	2	90	0	1
25	3	4	L	3	5	91	0	1
26	3	1	L	3	2	92	0	1
26	3	2	R	4	3	93	0	1
26	3	3	R	4	3	94	0	1
26	3	4	R	4	2	95	0	1
27	3	1	L	3	2	96	0	1
27	3	2	R	4	3	97	0	1
27	3	3	L	3	4	98	0	1
27	3	4	L	3	3	99	0	1
28	3	1	L	3	5	100	0	1
28	3	2	R	4	4	101	0	1
28	3	3	R	4	3	102	0	1
28	3	4	L	3	3	103	0	1
29	3	1	L	3	5	104	0	1
29	3	2	R	4	3	105	0	1
29	3	3	R	4	2	106	0	1
29	3	4	R	4	44	107	1	2
30	3	1	L	3	6	108	0	1
30	3	2	R	4	3	109	0	1
30	3	3	R	4	3	110	0	1
30	3	4	L	3	2	111	0	1
31	3	1	R	4	5	112	0	1
31	3	2	R	4	5	113	0	1
31	3	3	L	3	7	114	0	1
31	3	4	R	4	3	115	0	1
32	3	1	R	4	3	116	0	1
32	3	2	R	4	2	117	0	1
32	3	3	R	4	2	118	0	1
32	3	4	R	4	2	119	0	1
33	3	1	L	3	6	120	0	1
33	3	2	R	4	39	121	1	2
33	3	3	R	4	4	122	0	1
33	3	4	R	4	3	123	0	1
35	3	1	R	4	3	124	0	1
35	3	2	L	3	3	125	0	1
35	3	3	R	4	3	126	0	1
35	3	4	L	3	52	127	0	1
37	3	1	L	3	15	128	0	1
37	3	2	R	4	4	129	0	1
37	3	3	L	3	3	130	0	1
37	3	4	R	4	2	131	0	1
38	3	1	R	4	5	132	0	1
38	3	2	L	3	2	133	0	1
38	3	3	R	4	5	134	0	1
38	3	4	R	4	3	135	0	1
39	3	1	L	3	11	136	0	1
39	3	2	R	4	58	137	0	1
39	3	3	L	3	3	138	0	1
39	3	4	L	3	77	139	1	2
40	3	1	L	3	9	140	0	1
40	3	2	R	4	3	141	0	1
40	3	3	R	4	2	142	0	1
40	3	4	L	3	2	143	0	1
42	3	1	L	3	2	144	0	1
42	3	2	R	4	2	145	0	1
42	3	3	R	4	2	146	0	1
42	3	4	L	3	10	147	0	1
43	3	1	L	3	155	148	2	3
43	3	2	R	4	218	149	3	4
43	3	3	L	3	135	150	3	4
43	3	4	L	3	150	151	2	3
44	3	1	L	3	23	152	0	1
44	3	2	R	4	25	153	0	1
44	3	3	R	4	15	154	0	1
44	3	4	L	3	317	155	1	2
45	3	1	L	3	139	156	0	1
45	3	2	R	4	6	157	0	1
45	3	3	R	4	5	158	0	1
45	3	4	R	4	7	159	0	1
46	3	1	L	3	2	160	0	1
46	3	2	R	4	56	161	1	2
46	3	3	R	4	2	162	0	1
46	3	4	L	3	2	163	0	1
48	3	1	R	4	12	164	0	1
48	3	2	L	3	3	165	0	1
48	3	3	L	3	107	166	2	3
48	3	4	L	3	2	167	0	1
49	3	1	L	3	4	168	0	1
49	3	2	R	4	2	169	0	1
49	3	3	L	3	71	170	1	2
49	3	4	L	3	2	171	0	1
50	3	1	L	3	2	172	0	1
50	3	2	R	4	3	173	0	1
50	3	3	L	3	39	174	1	2
50	3	4	R	4	2	175	0	1
51	3	1	R	4	2	176	0	1
51	3	2	R	4	2	177	0	1
51	3	3	L	3	105	178	1	2
51	3	4	R	4	2	179	0	1
52	3	1	L	3	5	180	0	1
52	3	2	R	4	3	181	0	1
52	3	3	L	3	3	182	0	1
52	3	4	L	3	4	183	0	1
53	3	1	L	3	2	184	0	1
53	3	2	L	3	3	185	0	1
53	3	3	L	3	37	186	1	2
53	3	4	L	3	2	187	0	1
54	3	1	L	3	2	188	0	1
54	3	2	R	4	4	189	0	1
54	3	3	R	4	3	190	0	1
54	3	4	R	4	3	191	0	1
55	3	1	R	4	355	192	1	2
55	3	2	L	3	309	193	2	3
55	3	3	R	4	4	194	0	1
55	3	4	L	3	292	195	3	4
56	3	1	R	4	287	196	1	2
56	3	2	L	3	6	197	0	1
56	3	3	L	3	9	198	0	1
56	3	4	L	3	8	199	0	1
57	3	1	L	3	431	200	2	3
57	3	2	L	3	383	201	5	6
57	3	3	R	4	9	202	0	1
57	3	4	L	3	59	203	1	2
58	3	1	L	3	2	204	0	1
58	3	2	R	4	3	205	0	1
58	3	3	R	4	2	206	0	1
58	3	4	R	4	3	207	0	1
59	3	1	R	4	4	208	0	1
59	3	2	L	3	3	209	0	1
59	3	3	L	3	16	210	0	1
59	3	4	L	3	46	211	1	2
60	3	1	L	3	97	212	1	2
60	3	2	L	3	44	213	1	2
60	3	3	L	3	4	214	0	1
60	3	4	R	4	2	215	0	1
61	3	1	L	3	2	216	0	1
61	3	2	R	4	57	217	1	2
61	3	3	L	3	3	218	0	1
61	3	4	R	4	21	219	0	1
62	3	1	L	3	5	220	0	1
62	3	2	R	4	11	221	0	1
62	3	3	L	3	3	222	0	1
62	3	4	L	3	3	223	0	1
63	3	1	L	3	5	224	0	1
63	3	2	R	4	3	225	0	1
63	3	3	R	4	3	226	0	1
63	3	4	L	3	4	227	0	1
72	3	1	R	4	3	228	0	1
72	3	2	L	3	4	229	0	1
72	3	3	L	3	3	230	0	1
72	3	4	R	4	3	231	0	1
73	3	1	R	4	11	232	0	1
73	3	2	L	3	3	233	0	1
73	3	3	R	4	68	234	1	2
73	3	4	L	3	4	235	0	1
74	3	1	L	3	118	236	2	3
74	3	2	R	4	5	237	0	1
74	3	3	L	3	60	238	1	2
74	3	4	R	4	4	239	0	1
75	3	1	L	3	52	240	1	2
75	3	2	R	4	3	241	0	1
75	3	3	R	4	43	242	2	3
75	3	4	L	3	3	243	0	1
76	3	1	L	3	3	244	0	1
76	3	2	L	3	3	245	0	1
76	3	3	R	4	57	246	1	2
76	3	4	L	3	4	247	0	1
77	3	1	R	4	3	248	0	1
77	3	2	R	4	3	249	0	1
77	3	3	L	3	3	250	0	1
77	3	4	L	3	69	251	1	2
78	3	1	R	4	56	252	1	2
78	3	2	L	3	4	253	0	1
78	3	3	L	3	3	254	0	1
78	3	4	R	4	4	255	0	1
79	3	1	L	3	3	256	0	1
79	3	2	L	3	4	257	0	1
79	3	3	L	3	3	258	0	1
79	3	4	R	4	3	259	0	1
80	3	1	R	4	3	260	0	1
80	3	2	L	3	4	261	0	1
80	3	3	R	4	3	262	0	1
80	3	4	L	3	3	263	0	1
81	3	1	R	4	7	264	0	1
81	3	2	R	4	4	265	0	1
81	3	3	R	4	5	266	0	1
81	3	4	L	3	3	267	0	1
82	3	1	R	4	3	268	0	1
82	3	2	R	4	61	269	1	2
82	3	3	R	4	23	270	0	1
82	3	4	L	3	4	271	0	1
83	3	1	R	4	3	272	0	1
83	3	2	R	4	4	273	0	1
83	3	3	R	4	55	274	1	2
83	3	4	L	3	3	275	0	1
84	3	1	R	4	4	276	0	1
84	3	2	L	3	3	277	0	1
84	3	3	L	3	5	278	0	1
84	3	4	R	4	3	279	0	1
85	3	1	R	4	9	280	0	1
85	3	2	R	4	3	281	0	1
85	3	3	R	4	4	282	0	1
85	3	4	R	4	3	283	0	1
86	3	1	R	4	3	284	0	1
86	3	2	L	3	3	285	0	1
86	3	3	L	3	4	286	0	1
86	3	4	R	4	3	287	0	1
87	3	1	R	4	4	288	0	1
87	3	2	L	3	4	289	0	1
87	3	3	R	4	3	290	0	1
87	3	4	L	3	4	291	0	1
88	3	1	R	4	4	292	0	1
88	3	2	R	4	3	293	0	1
88	3	3	L	3	5	294	0	1
88	3	4	R	4	4	295	0	1
89	3	1	R	4	5	296	0	1
89	3	2	R	4	3	297	0	1
89	3	3	L	3	4	298	0	1
89	3	4	L	3	3	299	0	1
90	3	1	R	4	63	300	1	2
90	3	2	R	4	5	301	0	1
90	3	3	R	4	4	302	0	1
90	3	4	R	4	6	303	0	1
91	3	1	R	4	5	304	0	1
91	3	2	L	3	3	305	0	1
91	3	3	R	4	16	306	0	1
91	3	4	R	4	4	307	0	1
92	3	1	R	4	44	308	0	1
92	3	2	L	3	3	309	0	1
92	3	3	R	4	5	310	0	1
92	3	4	R	4	4	311	0	1
1	4	1	L	3	30	1	0	1
1	4	2	L	3	9	2	0	1
1	4	3	L	3	6	3	0	1
2	4	1	L	3	357	4	2	3
2	4	2	L	3	8	5	0	1
2	4	3	L	3	97	6	1	2
2	4	4	L	3	4	7	0	1
3	4	1	L	3	9	8	0	1
3	4	2	R	4	57	9	1	2
3	4	3	L	3	4	10	0	1
3	4	4	L	3	22	11	0	1
4	4	1	L	3	487	12	4	5
4	4	2	R	4	3	13	0	1
4	4	3	L	3	3	14	0	1
4	4	4	L	3	347	15	1	2
6	4	1	R	4	3	16	2	3
6	4	2	R	4	121	17	0	1
6	4	3	L	3	2	18	1	2
6	4	4	L	3	65	19	0	1
7	4	1	R	4	62	20	1	2
7	4	2	R	4	12	21	0	1
7	4	3	L	3	92	22	2	3
7	4	4	L	3	51	23	1	2
8	4	1	R	4	3	24	0	1
8	4	2	L	3	3	25	0	1
8	4	3	L	3	117	26	2	3
8	4	4	R	4	3	27	0	1
9	4	1	L	3	4	28	0	1
9	4	2	R	4	95	29	2	3
9	4	3	L	3	121	30	2	3
9	4	4	R	4	4	31	0	1
10	4	1	L	3	5	32	1	2
10	4	2	L	3	93	33	0	1
10	4	3	L	3	54	34	0	1
10	4	4	R	4	4	35	0	1
11	4	1	R	4	45	36	0	1
11	4	2	R	4	3	37	0	1
11	4	3	R	4	3	38	0	1
11	4	4	R	4	13	39	0	1
12	4	1	R	4	3	40	0	1
12	4	2	L	3	98	41	1	2
12	4	3	L	3	5	42	0	1
12	4	4	L	3	4	43	0	1
13	4	1	R	4	76	44	1	2
13	4	2	R	4	116	45	2	3
13	4	3	L	3	3	46	0	1
13	4	4	L	3	110	47	2	3
14	4	1	R	4	65	48	1	2
14	4	2	R	4	130	49	2	3
14	4	4	L	3	46	51	0	1
15	4	1	R	4	7	52	0	1
15	4	2	R	4	23	53	0	1
15	4	3	L	3	124	54	1	2
15	4	4	R	4	68	55	1	2
16	4	1	L	3	2	56	0	1
16	4	2	R	4	62	57	1	2
16	4	3	L	3	85	58	2	3
16	4	4	L	3	2	59	0	1
17	4	1	R	4	111	60	1	2
17	4	2	L	3	2	61	0	1
17	4	3	R	4	66	62	1	2
17	4	4	L	3	3	63	0	1
18	4	1	R	4	3	64	0	1
18	4	2	R	4	3	65	0	1
18	4	3	R	4	2	66	0	1
18	4	4	L	3	4	67	0	1
19	4	1	R	4	5	68	0	1
19	4	2	L	3	3	69	0	1
19	4	3	R	4	4	70	0	1
19	4	4	R	4	3	71	0	1
20	4	1	R	4	43	72	1	2
20	4	2	R	4	2	73	0	1
20	4	3	R	4	4	74	0	1
20	4	4	R	4	3	75	0	1
21	4	1	L	3	3	76	0	1
21	4	2	L	3	2	77	0	1
21	4	3	R	4	4	78	0	1
21	4	4	L	3	4	79	0	1
22	4	1	R	4	2	80	0	1
22	4	2	L	3	4	81	0	1
22	4	3	R	4	2	82	0	1
22	4	4	L	3	45	83	1	2
23	4	1	R	4	4	84	0	1
23	4	2	R	4	3	85	0	1
23	4	3	R	4	3	86	0	1
23	4	4	L	3	3	87	0	1
24	4	1	L	3	2	88	0	1
24	4	2	R	4	3	89	0	1
24	4	3	R	4	4	90	0	1
24	4	4	R	4	2	91	0	1
25	4	1	R	4	0	92	0	1
25	4	2	R	4	48	93	0	1
25	4	3	R	4	77	94	1	2
25	4	4	L	3	2	95	0	1
26	4	1	L	3	3	96	0	1
26	4	2	L	3	2	97	0	1
26	4	3	L	3	2	98	0	1
26	4	4	R	4	3	99	0	1
27	4	1	R	4	2	100	0	1
27	4	2	L	3	2	101	0	1
27	4	3	R	4	27	102	1	2
27	4	4	L	3	2	103	0	1
28	4	1	R	4	2	104	0	1
28	4	2	R	4	3	105	0	1
28	4	3	R	4	2	106	0	1
28	4	4	L	3	2	107	0	1
29	4	1	L	3	3	108	0	1
29	4	2	L	3	3	109	0	1
29	4	3	L	3	2	110	0	1
29	4	4	R	4	2	111	0	1
30	4	1	R	4	2	112	0	1
30	4	2	L	3	2	113	0	1
30	4	3	L	3	3	114	0	1
30	4	4	L	3	4	115	0	1
31	4	1	L	3	4	116	0	1
31	4	2	L	3	47	117	1	2
31	4	3	R	4	3	118	0	1
31	4	4	R	4	3	119	0	1
32	4	1	R	4	2	120	0	1
32	4	2	L	3	2	121	0	1
32	4	3	R	4	3	122	0	1
32	4	4	R	4	2	123	0	1
33	4	1	L	3	3	124	0	1
33	4	2	R	4	2	125	0	1
33	4	3	R	4	3	126	0	1
33	4	4	L	3	2	127	0	1
34	4	1	R	4	2	128	0	1
34	4	2	L	3	2	129	0	1
34	4	3	L	3	3	130	0	1
34	4	4	L	3	2	131	0	1
35	4	1	R	4	2	132	0	1
35	4	2	R	4	91	133	1	2
35	4	3	R	4	46	134	1	2
36	4	1	L	3	2	135	0	1
36	4	2	L	3	2	136	0	1
36	4	3	L	3	3	137	0	1
36	4	4	R	4	5	138	0	1
37	4	1	R	4	3	139	0	1
37	4	2	R	4	3	140	0	1
37	4	3	L	3	5	141	0	1
37	4	4	L	3	3	142	0	1
38	4	1	L	3	2	143	0	1
38	4	2	L	3	21	144	1	2
38	4	3	R	4	5	145	0	1
38	4	4	R	4	2	146	0	1
39	4	1	R	4	2	147	0	1
39	4	2	L	3	2	148	0	1
39	4	3	L	3	2	149	0	1
39	4	4	L	3	3	150	0	1
40	4	1	R	4	3	151	0	1
40	4	2	R	4	2	152	0	1
40	4	3	R	4	2	153	0	1
40	4	4	L	3	2	154	0	1
41	4	1	L	3	2	155	0	1
41	4	2	L	3	2	156	0	1
41	4	3	L	3	2	157	0	1
41	4	4	R	4	3	158	0	1
42	4	1	R	4	2	159	0	1
42	4	2	L	3	2	160	0	1
42	4	3	L	3	22	161	0	1
42	4	4	L	3	2	162	0	1
43	4	1	R	4	3	163	0	1
43	4	2	L	3	218	164	5	6
43	4	3	R	4	3	165	0	1
43	4	4	L	3	103	166	2	3
44	4	1	R	4	2	167	0	1
44	4	2	R	4	2	168	0	1
44	4	3	R	4	45	169	1	2
44	4	4	L	3	201	170	4	5
45	4	1	L	3	58	171	1	2
45	4	2	L	3	9	172	0	1
45	4	3	L	3	53	173	1	2
45	4	4	R	4	3	174	0	1
48	4	1	L	3	102	175	1	2
48	4	2	R	4	2	176	0	1
48	4	3	L	3	4	177	0	1
48	4	4	L	3	4	178	0	1
49	4	1	L	3	58	179	1	2
49	4	2	L	3	76	180	1	2
49	4	3	R	4	2	181	0	1
49	4	4	R	4	5	182	0	1
50	4	1	R	4	2	183	0	1
50	4	2	L	3	3	184	0	1
50	4	3	R	4	2	185	0	1
50	4	4	L	3	15	186	0	1
51	4	1	R	4	2	187	0	1
51	4	2	L	3	4	188	0	1
51	4	3	R	4	2	189	0	1
51	4	4	L	3	7	190	0	1
52	4	1	L	3	2	191	0	1
52	4	2	R	4	2	192	0	1
52	4	3	L	3	3	193	0	1
52	4	4	L	3	2	194	0	1
53	4	1	L	3	2	195	0	1
53	4	2	L	3	68	196	1	2
53	4	3	R	4	2	197	0	1
53	4	4	R	4	102	198	1	2
54	4	1	R	4	3	199	0	1
54	4	2	R	4	5	200	0	1
54	4	3	L	3	52	201	1	2
54	4	4	R	4	2	202	0	1
55	4	1	L	3	160	203	1	2
55	4	2	R	4	17	204	0	1
55	4	3	R	4	13	205	0	1
55	4	4	L	3	8	206	0	1
56	4	1	R	4	121	207	1	2
56	4	2	R	4	9	208	0	1
56	4	3	L	3	8	209	0	1
56	4	4	L	3	238	210	2	3
57	4	1	L	3	176	211	1	2
57	4	2	R	4	7	212	0	1
57	4	3	L	3	8	213	0	1
57	4	4	L	3	11	214	0	1
60	4	1	R	4	48	215	1	2
60	4	2	L	3	14	216	0	1
60	4	3	R	4	6	217	0	1
60	4	4	R	4	3	218	0	1
61	4	1	R	4	67	219	1	2
61	4	2	R	4	3	220	0	1
61	4	3	L	3	3	221	0	1
61	4	4	R	4	4	222	0	1
62	4	1	R	4	3	223	0	1
62	4	2	L	3	64	224	1	2
62	4	3	R	4	2	225	0	1
62	4	4	L	3	4	226	0	1
63	4	1	R	4	11	227	0	1
63	4	2	R	4	67	228	1	2
63	4	3	R	4	3	229	0	1
63	4	4	L	3	3	230	0	1
64	4	1	R	4	6	231	0	1
64	4	2	R	4	3	232	0	1
64	4	3	L	3	74	233	2	3
64	4	4	R	4	3	234	0	1
67	4	1	R	4	3	235	0	1
67	4	2	L	3	3	236	0	1
67	4	3	R	4	3	237	0	1
67	4	4	L	3	3	238	0	1
68	4	1	L	3	7	239	0	1
68	4	2	L	3	3	240	0	1
68	4	3	L	3	3	241	0	1
68	4	4	R	4	4	242	0	1
69	4	1	R	4	3	243	0	1
69	4	2	L	3	4	244	0	1
69	4	3	R	4	4	245	0	1
69	4	4	R	4	3	246	0	1
71	4	1	L	3	3	247	0	1
71	4	2	L	3	4	248	0	1
71	4	3	L	3	4	249	0	1
71	4	4	L	3	57	250	1	2
72	4	1	L	3	17	251	0	1
72	4	2	R	4	3	252	0	1
72	4	3	L	3	22	253	0	1
73	4	1	L	3	3	255	0	1
73	4	2	R	4	3	256	0	1
73	4	3	L	3	55	257	1	2
73	4	4	L	3	3	258	0	1
74	4	1	L	3	59	259	1	2
74	4	2	R	4	4	260	0	1
74	4	3	R	4	7	261	0	1
74	4	4	R	4	3	262	0	1
75	4	1	R	4	3	263	0	1
75	4	2	R	4	19	264	0	1
75	4	3	R	4	39	265	0	1
75	4	4	L	3	4	266	0	1
76	4	1	R	4	4	267	0	1
76	4	2	L	3	18	268	0	1
76	4	3	L	3	3	269	0	1
76	4	4	R	4	38	270	1	2
77	4	1	R	4	4	271	0	1
77	4	2	R	4	3	272	0	1
77	4	3	R	4	67	273	1	2
77	4	4	R	4	4	274	0	1
78	4	1	L	3	4	275	0	1
78	4	2	L	3	53	276	1	2
78	4	3	R	4	4	277	0	1
78	4	4	R	4	8	278	0	1
79	4	1	R	4	50	279	2	3
79	4	2	R	4	3	280	0	1
79	4	3	L	3	3	281	0	1
79	4	4	R	4	4	282	0	1
80	4	1	L	3	4	283	0	1
80	4	2	L	3	6	284	0	1
80	4	3	R	4	3	285	0	1
80	4	4	L	3	3	286	0	1
81	4	1	R	4	44	287	0	1
81	4	2	R	4	3	288	0	1
81	4	3	R	4	4	289	0	1
81	4	4	L	3	3	290	0	1
82	4	1	R	4	16	291	0	1
82	4	2	L	3	4	292	0	1
82	4	3	L	3	7	293	0	1
82	4	4	R	4	4	294	0	1
83	4	1	L	3	3	295	0	1
83	4	2	R	4	3	296	0	1
83	4	3	L	3	4	297	0	1
83	4	4	R	4	4	298	0	1
84	4	1	L	3	64	299	1	2
84	4	2	L	3	4	300	0	1
84	4	3	R	4	5	301	0	1
84	4	4	R	4	5	302	0	1
86	4	1	L	3	4	303	0	1
86	4	2	R	4	3	304	0	1
86	4	3	L	3	5	305	0	1
86	4	4	L	3	17	306	0	1
87	4	1	R	4	4	307	0	1
87	4	2	R	4	64	308	1	2
87	4	3	L	3	4	309	0	1
87	4	4	R	4	4	310	0	1
88	4	1	L	3	4	311	0	1
88	4	2	L	3	5	312	0	1
88	4	3	R	4	4	313	0	1
88	4	4	L	3	4	314	0	1
89	4	1	R	4	4	315	0	1
89	4	2	L	3	24	316	0	1
89	4	3	L	3	3	317	0	1
89	4	4	L	3	109	318	2	3
90	4	1	L	3	18	319	0	1
90	4	2	L	3	5	320	0	1
90	4	3	R	4	4	321	0	1
90	4	4	R	4	5	322	0	1
91	4	1	R	4	4	323	0	1
91	4	2	R	4	5	324	0	1
91	4	3	L	3	4	325	0	1
91	4	4	L	3	4	326	0	1
92	4	1	L	3	4	327	0	1
92	4	2	L	3	4	328	0	1
92	4	3	L	3	5	329	0	1
92	4	4	R	4	4	330	0	1
93	4	1	L	3	23	331	0	1
93	4	2	L	3	4	332	0	1
93	4	3	R	4	51	333	1	2
93	4	4	R	4	5	334	0	1
95	4	1	R	4	4	335	0	1
95	4	2	R	4	5	336	0	1
95	4	3	L	3	4	337	0	1
95	4	4	L	3	4	338	0	1
96	4	1	L	3	4	339	0	1
96	4	2	L	3	4	340	0	1
96	4	3	R	4	3	341	0	1
96	4	4	R	4	4	342	0	1
1	5	1	R	4	654	1	1	2
1	5	2	R	4	53	2	0	1
1	5	3	R	4	570	3	1	2
2	5	1	R	4	16	4	0	1
2	5	2	L	3	15	5	0	1
2	5	3	L	3	7	6	0	1
3	5	1	L	3	251	7	1	2
3	5	2	R	4	11	8	0	1
3	5	3	L	3	5	9	0	1
3	5	4	R	4	668	10	3	4
4	5	1	L	3	42	11	0	1
4	5	2	R	4	56	12	1	2
4	5	3	R	4	256	13	3	4
4	5	4	L	3	32	14	0	1
6	5	1	R	4	64	15	1	2
6	5	2	R	4	39	16	0	1
6	5	3	R	4	4	17	0	1
6	5	4	L	3	110	18	2	3
7	5	1	R	4	230	19	4	5
7	5	2	R	4	6	20	0	1
7	5	3	R	4	86	21	1	2
7	5	4	L	3	4	22	0	1
8	5	1	L	3	12	23	0	1
8	5	2	L	3	7	24	0	1
8	5	3	L	3	232	25	4	5
8	5	4	L	3	174	26	2	3
9	5	1	L	3	10	27	0	1
9	5	2	L	3	10	28	0	1
9	5	3	L	3	17	29	0	1
9	5	4	R	4	114	30	1	2
10	5	1	L	3	12	31	0	1
10	5	2	L	3	8	32	0	1
10	5	4	R	4	7	33	3	4
11	5	1	L	3	51	34	1	2
11	5	2	R	4	78	35	0	1
11	5	4	R	4	48	36	1	2
12	5	1	L	3	5	38	0	1
12	5	2	R	4	7	39	0	1
12	5	3	R	4	5	40	0	1
12	5	4	R	4	35	41	1	2
13	5	1	R	4	23	42	0	1
13	5	2	R	4	41	43	1	2
13	5	3	R	4	54	44	0	1
13	5	4	R	4	26	45	0	1
14	5	1	L	3	11	46	0	1
14	5	2	L	3	218	47	3	4
14	5	3	R	4	4	48	0	1
14	5	4	L	3	3	49	0	1
15	5	1	L	3	4	50	0	1
15	5	2	L	3	5	51	0	1
15	5	3	R	4	5	52	0	1
15	5	4	R	4	79	53	1	2
16	5	1	L	3	7	54	0	1
16	5	2	L	3	9	55	0	1
16	5	3	R	4	2	56	0	1
16	5	4	L	3	106	57	2	3
17	5	1	R	4	13	58	0	1
17	5	2	L	3	4	59	0	1
17	5	3	R	4	5	60	0	1
17	5	4	L	3	5	61	0	1
18	5	1	R	4	66	62	1	2
18	5	2	R	4	118	63	1	2
18	5	3	L	3	6	64	0	1
18	5	4	R	4	3	65	0	1
19	5	1	L	3	4	66	0	1
19	5	2	R	4	50	67	1	2
19	5	3	L	3	4	68	0	1
19	5	4	R	4	5	69	0	1
20	5	1	R	4	2	70	0	1
20	5	2	R	4	4	71	0	1
20	5	3	R	4	8	72	0	1
20	5	4	L	3	4	73	0	1
21	5	1	L	3	56	74	1	2
21	5	2	L	3	8	75	0	1
21	5	3	L	3	7	76	0	1
21	5	4	R	4	3	77	0	1
22	5	1	L	3	6	78	0	1
22	5	2	R	4	70	79	1	2
22	5	3	R	4	3	80	0	1
22	5	4	R	4	4	81	0	1
23	5	1	R	4	3	82	0	1
23	5	2	L	3	2	83	0	1
23	5	3	L	3	2	84	0	1
23	5	4	L	3	3	85	0	1
24	5	1	R	4	10	86	0	1
24	5	2	R	4	3	87	0	1
24	5	3	L	3	2	88	0	1
24	5	4	L	3	41	89	1	2
25	5	1	R	4	3	90	0	1
25	5	2	L	3	8	91	0	1
25	5	3	L	3	2	92	0	1
25	5	4	L	3	3	93	0	1
26	5	1	R	4	4	94	0	1
26	5	2	L	3	3	95	0	1
26	5	3	R	4	4	96	0	1
26	5	4	L	3	5	97	0	1
27	5	1	L	3	3	98	0	1
27	5	2	R	4	48	99	0	1
27	5	3	R	4	3	100	0	1
27	5	4	R	4	2	101	0	1
28	5	1	R	4	2	102	0	1
28	5	2	L	3	4	103	0	1
28	5	3	L	3	4	104	0	1
28	5	4	L	3	3	105	0	1
29	5	1	R	4	3	106	0	1
29	5	2	L	3	4	107	0	1
29	5	3	R	4	3	108	0	1
29	5	4	L	3	3	109	0	1
30	5	1	R	4	4	110	0	1
30	5	2	R	4	3	111	0	1
30	5	3	L	3	14	112	0	1
30	5	4	L	3	2	113	0	1
31	5	1	R	4	2	114	0	1
31	5	2	R	4	2	115	0	1
31	5	3	R	4	5	116	0	1
31	5	4	L	3	3	117	0	1
32	5	1	R	4	2	118	0	1
32	5	2	L	3	5	119	0	1
32	5	3	R	4	2	120	0	1
32	5	4	R	4	2	121	0	1
33	5	1	L	3	7	122	0	1
33	5	2	R	4	3	123	0	1
33	5	3	L	3	3	124	0	1
33	5	4	R	4	7	125	0	1
34	5	1	R	4	44	126	1	2
34	5	2	L	3	13	127	0	1
34	5	3	R	4	3	128	0	1
34	5	4	L	3	28	129	0	1
35	5	1	R	4	3	130	0	1
35	5	2	L	3	66	131	0	1
35	5	3	L	3	3	132	0	1
35	5	4	L	3	5	133	0	1
36	5	1	R	4	2	134	0	1
36	5	2	L	3	3	135	0	1
36	5	3	L	3	3	136	0	1
36	5	4	L	3	4	137	0	1
37	5	1	L	3	10	138	0	1
37	5	2	R	4	2	139	0	1
37	5	3	L	3	8	140	0	1
37	5	4	L	3	5	141	0	1
38	5	1	R	4	5	142	0	1
38	5	2	R	4	3	143	0	1
38	5	3	L	3	10	144	0	1
38	5	4	L	3	6	145	0	1
39	5	1	L	3	3	146	0	1
39	5	2	R	4	2	147	0	1
39	5	3	R	4	2	148	0	1
39	5	4	R	4	2	149	0	1
40	5	1	R	4	3	150	0	1
40	5	2	L	3	5	151	0	1
40	5	3	L	3	3	152	0	1
40	5	4	L	3	2	153	0	1
41	5	1	R	4	2	154	0	1
41	5	2	L	3	3	155	0	1
41	5	3	R	4	2	156	0	1
41	5	4	L	3	2	157	0	1
42	5	1	R	4	2	158	0	1
42	5	2	R	4	5	159	0	1
42	5	3	L	3	2	160	0	1
42	5	4	L	3	4	161	0	1
43	5	1	L	3	183	162	3	4
43	5	2	R	4	8	163	0	1
43	5	3	R	4	127	164	2	3
43	5	4	R	4	112	165	2	3
44	5	2	L	3	141	167	1	2
44	5	3	L	3	10	168	0	1
44	5	4	L	3	818	169	4	5
45	5	1	R	4	45	170	1	2
45	5	2	L	3	104	171	2	3
45	5	3	R	4	9	172	0	1
45	5	4	L	3	3	173	0	1
46	5	1	R	4	22	174	0	1
46	5	2	R	4	5	175	0	1
46	5	3	L	3	3	176	0	1
46	5	4	L	3	3	177	0	1
48	5	1	R	4	2	178	0	1
48	5	2	L	3	4	179	0	1
48	5	3	L	3	2	180	0	1
48	5	4	L	3	42	181	1	2
49	5	1	L	3	43	182	0	1
49	5	2	R	4	51	183	1	2
49	5	3	R	4	2	184	0	1
49	5	4	L	3	12	185	0	1
50	5	1	R	4	4	186	0	1
50	5	2	R	4	3	187	0	1
50	5	3	L	3	4	188	0	1
50	5	4	R	4	3	189	0	1
51	5	1	R	4	5	190	0	1
51	5	2	L	3	6	191	0	1
51	5	3	L	3	3	192	0	1
51	5	4	R	4	7	193	0	1
52	5	1	R	4	12	322	0	1
52	5	2	L	3	3	323	0	1
52	5	3	R	4	5	324	0	1
52	5	4	R	4	4	325	0	1
53	5	1	L	3	5	326	0	1
53	5	2	R	4	92	327	1	2
53	5	3	R	4	104	328	1	2
53	5	4	L	3	2	329	0	1
54	5	1	R	4	91	194	0	1
54	5	2	R	4	8	195	0	1
54	5	3	R	4	3	196	0	1
54	5	4	L	3	2	197	0	1
55	5	1	L	3	41	198	0	1
55	5	2	R	4	174	199	1	2
55	5	3	R	4	13	200	0	1
55	5	4	R	4	11	201	0	1
56	5	1	R	4	23	202	0	1
56	5	2	L	3	143	203	0	1
56	5	3	L	3	7	204	0	1
56	5	4	R	4	6	205	0	1
57	5	1	L	3	6	206	0	1
57	5	2	R	4	25	207	0	1
57	5	3	R	4	56	208	1	2
57	5	4	R	4	2	209	0	1
59	5	1	L	3	3	210	0	1
59	5	2	R	4	55	211	1	2
59	5	3	R	4	2	212	0	1
59	5	4	L	3	4	213	0	1
60	5	1	R	4	5	214	0	1
60	5	2	R	4	3	215	0	1
60	5	3	R	4	5	216	0	1
60	5	4	R	4	5	217	0	1
61	5	1	L	3	7	218	0	1
61	5	2	R	4	3	219	0	1
61	5	3	L	3	3	220	0	1
61	5	4	R	4	6	221	0	1
62	5	1	L	3	3	222	0	1
62	5	2	R	4	3	223	0	1
62	5	3	R	4	4	224	0	1
62	5	4	R	4	4	225	0	1
63	5	1	L	3	4	226	0	1
63	5	2	L	3	2	227	0	1
63	5	3	L	3	5	228	0	1
63	5	4	L	3	3	229	0	1
64	5	1	R	4	89	330	3	4
64	5	2	L	3	7	331	0	1
64	5	3	R	4	62	332	1	2
64	5	4	L	3	2	333	0	1
65	5	1	R	4	31	230	0	1
65	5	2	L	3	3	231	0	1
65	5	3	L	3	24	232	0	1
65	5	4	L	3	7	233	0	1
66	5	1	L	3	63	234	1	2
66	5	2	L	3	3	235	0	1
66	5	3	L	3	3	236	0	1
66	5	4	L	3	4	237	0	1
67	5	1	L	3	3	238	0	1
67	5	2	R	4	56	239	1	2
67	5	3	L	3	3	240	0	1
67	5	4	R	4	70	241	0	1
68	5	1	L	3	3	242	0	1
68	5	2	L	3	61	243	1	2
68	5	3	R	4	3	244	0	1
68	5	4	L	3	5	245	0	1
69	5	1	L	3	3	246	0	1
69	5	2	L	3	6	247	0	1
69	5	3	L	3	3	248	0	1
69	5	4	R	4	5	249	0	1
73	5	1	L	3	52	250	1	2
73	5	2	L	3	11	251	1	2
73	5	3	L	3	3	252	0	1
73	5	4	L	3	50	253	1	2
74	5	1	R	4	4	254	0	1
74	5	2	L	3	4	255	0	1
74	5	3	L	3	3	256	0	1
74	5	4	R	4	68	257	1	2
75	5	1	R	4	3	258	0	1
75	5	2	R	4	9	259	0	1
75	5	3	L	3	4	260	0	1
75	5	4	R	4	58	261	1	2
76	5	1	R	4	81	262	1	2
76	5	2	R	4	3	263	0	1
76	5	3	L	3	64	264	1	2
76	5	4	L	3	3	265	0	1
78	5	1	R	4	3	266	0	1
78	5	2	R	4	5	267	0	1
78	5	3	L	3	3	268	0	1
78	5	4	R	4	3	269	0	1
79	5	1	L	3	47	270	1	2
79	5	2	L	3	3	271	0	1
79	5	3	L	3	3	272	0	1
79	5	4	R	4	62	273	1	2
80	5	1	R	4	63	274	1	2
80	5	2	L	3	3	275	0	1
80	5	3	L	3	4	276	0	1
80	5	4	L	3	3	277	0	1
81	5	1	L	3	50	278	1	2
81	5	2	R	4	3	279	0	1
81	5	3	L	3	5	280	0	1
81	5	4	R	4	4	281	1	2
82	5	1	L	3	3	282	0	1
82	5	2	R	4	4	283	0	1
82	5	3	R	4	3	284	0	1
82	5	4	L	3	67	285	1	2
84	5	1	R	4	5	286	0	1
84	5	2	L	3	4	287	0	1
84	5	3	L	3	3	288	0	1
84	5	4	L	3	4	289	0	1
85	5	1	R	4	13	290	0	1
85	5	2	L	3	3	291	0	1
85	5	3	R	4	3	292	0	1
85	5	4	R	4	4	293	0	1
86	5	1	L	3	4	294	0	1
86	5	2	R	4	3	295	0	1
86	5	3	R	4	4	296	0	1
86	5	4	R	4	3	297	0	1
87	5	1	L	3	4	298	0	1
87	5	2	R	4	6	299	0	1
87	5	3	L	3	4	300	0	1
87	5	4	L	3	5	301	0	1
88	5	1	L	3	5	302	0	1
88	5	2	R	4	4	303	0	1
88	5	3	L	3	5	304	0	1
88	5	4	L	3	3	305	0	1
89	5	1	L	3	21	306	0	1
89	5	2	L	3	3	307	0	1
89	5	3	R	4	4	308	0	1
89	5	4	R	4	5	309	0	1
91	5	1	L	3	3	310	0	1
91	5	2	L	3	4	311	0	1
91	5	3	R	4	4	312	0	1
91	5	4	R	4	3	313	0	1
93	5	1	L	3	3	334	0	1
93	5	2	R	4	4	335	0	1
93	5	3	R	4	4	336	0	1
93	5	4	L	3	4	337	0	1
94	5	1	L	3	44	314	0	1
94	5	2	L	3	4	315	0	1
94	5	3	R	4	3	316	0	1
94	5	4	R	4	19	317	0	1
95	5	1	L	3	4	318	0	1
95	5	2	R	4	3	319	0	1
95	5	3	R	4	4	320	0	1
95	5	4	L	3	4	321	0	1
96	5	1	R	4	9	338	0	1
96	5	2	R	4	3	339	0	1
96	5	3	L	3	4	340	0	1
96	5	4	L	3	4	341	0	1
1	7	1	R	4	4	1	0	1
1	7	2	R	4	119	2	1	2
2	7	1	R	4	42	3	1	2
2	7	2	L	3	96	4	1	2
2	7	3	R	4	139	5	2	3
2	7	4	L	3	6	6	0	1
3	7	1	L	3	118	7	2	3
3	7	2	L	3	79	8	1	2
3	7	3	R	4	8	9	0	1
3	7	4	L	3	4	10	0	1
4	7	1	R	4	23	11	0	1
4	7	2	L	3	31	12	0	1
4	7	4	L	3	127	13	2	3
5	7	2	R	4	6	15	0	1
5	7	3	R	4	6	16	0	1
5	7	4	R	4	119	17	1	2
7	7	1	L	3	6	18	0	1
7	7	2	L	3	6	19	0	1
7	7	3	L	3	7	20	0	1
7	7	4	L	3	6	21	0	1
8	7	1	R	4	31	22	1	2
8	7	2	R	4	5	23	0	1
8	7	3	L	3	5	24	0	1
8	7	4	R	4	4	25	0	1
9	7	1	R	4	4	26	0	1
9	7	2	R	4	120	27	1	2
9	7	3	R	4	5	28	0	1
9	7	4	L	3	7	29	0	1
10	7	1	L	3	5	30	0	1
10	7	2	R	4	4	31	0	1
10	7	3	R	4	3	32	0	1
10	7	4	L	3	67	33	1	2
11	7	1	L	3	78	34	1	2
11	7	2	L	3	93	35	1	2
11	7	3	R	4	471	36	8	9
11	7	4	L	3	12	37	0	1
12	7	1	R	4	7	38	0	1
12	7	2	R	4	47	39	1	2
12	7	3	R	4	4	40	0	1
12	7	4	R	4	104	41	1	2
13	7	1	L	3	2	42	0	1
13	7	2	R	4	7	43	0	1
13	7	3	R	4	49	44	0	1
13	7	4	R	4	188	45	1	2
14	7	1	R	4	65	46	1	2
14	7	2	R	4	3	47	0	1
14	7	3	L	3	4	48	0	1
14	7	4	R	4	3	49	0	1
15	7	1	R	4	64	50	1	2
15	7	2	R	4	4	51	0	1
15	7	3	R	4	161	52	2	3
15	7	4	R	4	5	53	0	1
16	7	1	L	3	3	54	0	1
16	7	2	R	4	4	55	0	1
16	7	3	R	4	4	56	0	1
16	7	4	R	4	6	57	0	1
17	7	1	R	4	54	58	1	2
17	7	2	R	4	6	59	0	1
17	7	3	L	3	31	60	0	1
17	7	4	R	4	4	61	0	1
18	7	1	L	3	5	62	0	1
18	7	2	L	3	7	63	0	1
18	7	3	L	3	46	64	0	1
18	7	4	R	4	5	65	0	1
19	7	1	R	4	3	66	0	1
19	7	2	L	3	54	67	1	2
19	7	3	L	3	110	68	2	3
19	7	4	L	3	45	69	1	2
21	7	1	R	4	4	70	0	1
21	7	2	R	4	4	71	0	1
21	7	3	L	3	5	72	0	1
21	7	4	L	3	3	73	0	1
22	7	1	L	3	2	74	0	1
22	7	2	L	3	3	75	0	1
22	7	3	L	3	4	76	0	1
22	7	4	R	4	4	77	0	1
23	7	1	R	4	3	78	0	1
23	7	2	L	3	7	79	0	1
23	7	3	L	3	4	80	0	1
23	7	4	L	3	63	81	1	2
24	7	1	L	3	46	82	1	2
24	7	2	L	3	2	83	0	1
24	7	3	L	3	4	84	0	1
24	7	4	R	4	9	85	0	1
25	7	1	R	4	5	86	0	1
25	7	2	L	3	4	87	0	1
25	7	3	L	3	69	88	1	2
25	7	4	L	3	3	89	0	1
26	7	1	R	4	2	90	0	1
26	7	2	L	3	4	91	0	1
26	7	3	L	3	5	92	0	1
26	7	4	R	4	4	93	0	1
27	7	1	L	3	4	94	0	1
27	7	2	L	3	37	95	1	2
27	7	3	L	3	4	96	0	1
27	7	4	R	4	7	97	0	1
28	7	1	R	4	3	98	0	1
28	7	2	L	3	9	99	0	1
28	7	3	L	3	8	100	0	1
28	7	4	L	3	3	101	0	1
29	7	1	R	4	3	102	0	1
29	7	2	L	3	4	103	0	1
29	7	3	L	3	2	104	0	1
29	7	4	R	4	4	105	0	1
30	7	1	L	3	3	106	0	1
30	7	2	R	4	4	107	0	1
30	7	3	L	3	43	108	1	2
30	7	4	L	3	5	109	0	1
31	7	1	L	3	4	110	0	1
31	7	2	R	4	4	111	0	1
31	7	3	R	4	3	112	0	1
31	7	4	R	4	38	113	1	2
32	7	1	R	4	2	114	0	1
32	7	2	R	4	3	115	0	1
32	7	3	R	4	4	116	0	1
32	7	4	R	4	2	117	0	1
33	7	1	R	4	2	118	0	1
33	7	2	L	3	5	119	0	1
33	7	3	L	3	3	120	0	1
33	7	4	R	4	3	121	0	1
34	7	1	R	4	2	122	0	1
34	7	2	L	3	3	123	0	1
34	7	3	R	4	3	124	0	1
34	7	4	R	4	3	125	0	1
36	7	1	L	3	47	126	1	2
36	7	2	L	3	3	127	0	1
36	7	3	L	3	3	128	0	1
36	7	4	L	3	17	129	0	1
37	7	1	R	4	2	130	0	1
37	7	2	L	3	3	131	0	1
37	7	3	R	4	7	132	0	1
37	7	4	R	4	2	133	0	1
38	7	1	R	4	2	134	0	1
38	7	2	L	3	78	135	2	3
38	7	3	R	4	3	136	0	1
38	7	4	L	3	9	137	0	1
39	7	1	L	3	2	138	0	1
39	7	2	L	3	67	139	1	2
39	7	3	L	3	3	140	0	1
39	7	4	R	4	7	141	0	1
40	7	1	R	4	2	142	0	1
40	7	2	L	3	3	143	0	1
40	7	3	L	3	2	144	0	1
40	7	4	L	3	2	145	0	1
41	7	1	R	4	2	146	0	1
41	7	2	L	3	3	147	0	1
41	7	3	L	3	2	148	0	1
41	7	4	R	4	2	149	0	1
42	7	1	L	3	2	150	0	1
42	7	2	R	4	2	151	0	1
42	7	3	L	3	26	152	1	2
42	7	4	L	3	2	153	0	1
43	7	1	L	3	6	154	0	1
43	7	2	L	3	226	155	4	5
43	7	3	L	3	54	156	1	2
43	7	4	R	4	94	157	1	2
44	7	1	R	4	10	158	0	1
44	7	2	L	3	32	159	0	1
44	7	3	L	3	197	160	2	3
44	7	4	L	3	5	161	3	4
45	7	1	R	4	3	162	0	1
45	7	2	L	3	85	163	2	3
45	7	3	L	3	3	164	0	1
45	7	4	R	4	3	165	0	1
48	7	1	L	3	3	166	0	1
48	7	2	L	3	2	167	0	1
48	7	3	R	4	2	168	0	1
48	7	4	R	4	3	169	0	1
49	7	1	R	4	3	170	0	1
49	7	2	R	4	2	171	0	1
49	7	3	R	4	3	172	0	1
49	7	4	L	3	2	173	0	1
50	7	1	L	3	64	174	1	2
50	7	2	R	4	2	175	0	1
50	7	3	L	3	11	176	0	1
50	7	4	R	4	4	177	0	1
51	7	1	R	4	2	178	0	1
51	7	2	L	3	4	179	0	1
51	7	3	L	3	3	180	0	1
51	7	4	R	4	2	181	0	1
52	7	1	L	3	4	182	0	1
52	7	2	R	4	4	183	0	1
52	7	3	L	3	5	184	0	1
52	7	4	L	3	39	185	1	2
53	7	1	R	4	2	186	0	1
53	7	2	L	3	64	187	1	2
53	7	3	R	4	132	188	1	2
55	7	1	L	3	11	189	0	1
55	7	2	R	4	92	190	1	2
55	7	3	R	4	9	191	0	1
55	7	4	R	4	89	192	1	2
56	7	1	L	3	12	193	0	1
56	7	2	L	3	12	194	0	1
56	7	3	R	4	11	195	0	1
56	7	4	R	4	16	196	0	1
57	7	1	L	3	15	197	0	1
57	7	2	R	4	61	198	0	1
57	7	3	R	4	248	199	2	3
57	7	4	R	4	7	200	0	1
58	7	1	L	3	4	201	0	1
58	7	2	R	4	73	202	1	2
58	7	3	L	3	4	203	0	1
58	7	4	R	4	4	204	0	1
59	7	1	R	4	5	205	0	1
59	7	2	R	4	66	206	1	2
59	7	3	L	3	2	207	0	1
59	7	4	R	4	2	208	0	1
60	7	1	R	4	3	209	0	1
60	7	2	R	4	3	210	0	1
60	7	3	R	4	2	211	0	1
60	7	4	R	4	3	212	0	1
61	7	1	L	3	5	213	0	1
61	7	2	R	4	4	214	0	1
61	7	3	R	4	53	215	1	2
61	7	4	L	3	4	216	0	1
62	7	1	L	3	3	217	0	1
62	7	2	L	3	5	218	0	1
62	7	3	L	3	3	219	0	1
62	7	4	R	4	3	220	0	1
64	7	1	R	4	3	221	0	1
64	7	2	L	3	64	222	1	2
64	7	3	L	3	3	223	0	1
64	7	4	R	4	3	224	0	1
65	7	1	L	3	3	225	0	1
65	7	2	L	3	4	226	0	1
65	7	3	R	4	3	227	0	1
65	7	4	R	4	3	228	0	1
66	7	1	R	4	3	229	0	1
66	7	2	L	3	5	230	0	1
66	7	3	L	3	4	231	0	1
66	7	4	R	4	6	232	0	1
67	7	1	R	4	4	233	0	1
67	7	2	R	4	3	234	0	1
67	7	3	R	4	5	235	0	1
67	7	4	R	4	61	236	1	2
68	7	1	L	3	3	237	0	1
68	7	2	L	3	4	238	0	1
68	7	3	L	3	3	239	0	1
68	7	4	L	3	3	240	0	1
73	7	1	L	3	3	241	0	1
73	7	2	L	3	126	242	2	3
73	7	3	L	3	62	243	1	2
73	7	4	L	3	5	244	0	1
74	7	1	L	3	58	245	1	2
74	7	2	R	4	4	246	0	1
74	7	3	L	3	13	247	0	1
74	7	4	R	4	116	248	2	3
76	7	1	R	4	83	249	2	3
76	7	2	R	4	3	250	0	1
76	7	3	L	3	5	251	0	1
76	7	4	R	4	54	252	1	2
77	7	1	L	3	4	253	0	1
77	7	2	R	4	5	254	0	1
77	7	3	R	4	4	255	0	1
77	7	4	R	4	58	256	1	2
78	7	1	R	4	3	257	0	1
78	7	2	L	3	3	258	0	1
78	7	3	L	3	4	259	0	1
78	7	4	R	4	4	260	0	1
79	7	1	R	4	63	261	1	2
79	7	2	R	4	3	262	0	1
79	7	3	R	4	4	263	0	1
79	7	4	R	4	3	264	0	1
80	7	1	L	3	5	265	0	1
80	7	2	L	3	4	266	0	1
80	7	3	L	3	3	267	0	1
80	7	4	R	4	3	268	0	1
81	7	1	R	4	3	269	0	1
81	7	2	R	4	4	270	0	1
81	7	3	R	4	3	271	0	1
81	7	4	R	4	3	272	0	1
82	7	1	L	3	38	273	1	2
82	7	2	R	4	3	274	0	1
82	7	3	R	4	7	275	0	1
82	7	4	L	3	4	276	0	1
84	7	1	L	3	5	277	0	1
84	7	2	L	3	4	278	0	1
84	7	3	R	4	4	279	0	1
84	7	4	L	3	6	280	0	1
85	7	1	L	3	4	281	0	1
85	7	2	L	3	4	282	0	1
85	7	3	R	4	5	283	0	1
85	7	4	L	3	3	284	0	1
86	7	1	L	3	5	285	0	1
86	7	2	R	4	3	286	0	1
86	7	3	R	4	4	287	0	1
86	7	4	R	4	3	288	0	1
87	7	1	R	4	3	289	0	1
87	7	2	L	3	3	290	0	1
87	7	3	R	4	56	291	1	2
87	7	4	R	4	77	292	1	2
88	7	1	L	3	3	293	0	1
88	7	2	L	3	4	294	0	1
88	7	3	L	3	59	295	1	2
88	7	4	L	3	4	296	0	1
89	7	1	L	3	3	297	0	1
89	7	2	L	3	4	298	0	1
89	7	3	L	3	3	299	0	1
89	7	4	L	3	90	300	2	3
90	7	1	L	3	4	301	0	1
90	7	2	R	4	4	302	0	1
90	7	3	R	4	5	303	0	1
90	7	4	L	3	4	304	0	1
92	7	1	R	4	4	305	0	1
92	7	2	L	3	4	306	0	1
92	7	3	R	4	4	307	0	1
92	7	4	R	4	3	308	0	1
93	7	1	L	3	4	309	0	1
93	7	2	L	3	5	310	0	1
[truncated: 710 more rows]

## Sheet: expt 2 trial errors
snake	session	cumul.trial	trial	errors.per.trial	tries.until.success	time	correct	event
11	1	1	1	3	4	90	L	3
11	1	2	2	1	2	42	R	4
11	1	3	3	2	3	19	L	3
11	2	4	1	1	2	50	R	4
11	2	5	2	1	2	93	L	3
11	2	6	3	0	1	12	L	3
11	3	7	1	0	1	2	L	3
11	3	8	2	0	1	2	L	3
11	3	9	3	1	2	133	R	4
11	4	10	1	1	2	58	L	3
11	4	11	2	3	4	118	R	4
11	4	12	3	0	1	22	R	4
11	5	13	1	1	2	38	R	4
11	5	14	2	0	1	36	L	3
11	5	15	3	1	2	120	R	4
11	6	16	1	1	2	61	R	4
11	6	17	2	1	2	124	L	3
11	6	18	3	0	1	2	L	3
11	7	19	1	2	3	189	L	3
11	7	20	2	0	1	26	R	4
11	7	21	3	1	2	70	L	3
11	8	22	1	1	2	104	L	3
11	8	23	2	1	2	114	L	3
11	8	24	3	1	2	18	R	4
11	9	25	1	1	2	125	L	3
11	9	26	2	1	2	253	R	4
11	9	27	3	0	1	15	L	3
11	10	28	1	0	1	9	R	4
11	10	29	2	0	1	20	L	3
11	10	30	3	0	1	21	R	4
11	11	31	1	0	1	6	R	4
11	11	32	2	0	1	15	L	3
11	12	33	1	2	3	02:27:00	L	3
11	12	34	2	0	1	4	R	4
11	12	35	3	0	1	4	L	3
11	13	36	1	0	1	4	L	3
11	13	37	2	0	1	3	R	4
11	13	38	3	1	2	118	L	3
11	14	39	1	0	1	4	R	4
11	14	40	2	0	1	5	R	4
11	14	41	3	0	1	18	L	3
11	15	42	1	2	3	251	L	3
11	15	43	2	0	1	17	L	3
11	15	44	3	1	2	115	L	3
11	16	45	1	0	1	3	R	4
11	16	46	2	1	2	95	L	3
11	16	47	3	1	2	50	R	4
11	17	48	1	0	1	5	R	4
11	17	49	2	0	1	5	R	4
11	17	50	3	0	1	3	R	4
11	18	51	1	1	2	93	R	4
11	18	52	2	1	2	41	L	3
11	18	53	3	0	1	9	L	3
11	19	54	1	3	4	90	L	3
11	19	55	2	1	2	42	R	4
11	19	56	3	2	3	19	L	3
11	20	57	1	1	2	50	R	4
11	20	58	2	1	2	93	L	3
11	20	59	3	0	1	12	L	3
11	21	60	1	0	1	2	L	3
11	21	61	2	0	1	2	L	3
11	21	62	3	1	2	133	R	4
11	22	63	1	1	2	58	L	3
11	22	64	2	3	4	118	R	4
11	22	65	3	0	1	22	R	4
11	23	66	1	1	2	38	R	4
11	23	67	2	0	1	36	L	3
11	23	68	3	1	2	120	R	4
11	24	69	1	1	2	61	R	4
11	24	70	2	1	2	124	L	3
11	24	71	3	0	1	2	L	3
11	25	72	1	0	1	22	L	3
11	25	73	2	0	1	3	R	4
11	25	74	3	0	1	2	L	3
11	26	75	1	1	2	73	L	3
11	26	76	2	0	1	3	L	3
11	26	77	3	1	2	34	R	4
11	27	78	1	0	1	3	L	3
11	27	79	2	0	1	5	L	3
11	27	80	3	1	2	39	L	3
11	28	81	1	0	1	4	R	4
11	28	82	2	1	2	62	L	3
11	28	83	3	0	1	3	L	3
11	29	84	1	1	2	66	R	4
11	29	85	2	0	1	3	L	3
11	29	86	3	0	1	3	L	3
11	30	87	1	0	1	2	L	3
11	30	88	2	0	1	8	R	4
11	30	89	3	1	2	76	L	3
11	31	90	1	2	3	137	R	4
11	31	91	2	2	3	84	L	3
11	31	92	3	1	2	61	L	3
11	32	93	1	0	1	3	L	3
11	32	94	2	0	1	52	R	4
11	32	95	3	0	1	5	R	4
11	33	96	1	0	1	4	L	3
11	33	97	2	1	2	60	R	4
11	33	98	3	0	1	1	L	3
11	34	99	1	0	1	4	L	3
11	34	100	2	0	1	3	R	4
11	34	101	3	0	1	16	R	4
11	35	102	1	0	1	7	L	3
11	35	103	2	0	1	3	L	3
11	35	104	3	0	1	3	R	4
11	36	105	1	0	1	7	L	3
11	36	106	2	1	2	59	R	4
11	36	107	3	0	1	4	L	3
11	37	108	1	0	1	7	L	3
11	37	109	2	1	2	51	R	4
11	37	110	3	0	1	4	L	3
11	38	111	1	1	2	54	L	3
11	38	112	2	1	2	63	R	4
11	38	113	3	1	2	44	R	4
11	39	114	1	0	1	5	L	3
11	39	115	2	1	2	98	R	4
11	39	116	3	0	1	4	L	3
11	40	117	1	0	1	5	L	3
11	40	118	2	1	2	56	R	4
11	40	119	3	0	1	6	L	3
11	41	120	1	0	1	21	L	3
11	41	121	2	1	2	56	R	4
11	41	122	3	1	2	52	R	4
11	42	123	1	0	1	4	L	3
11	42	124	2	1	2	80	R	4
11	42	125	3	0	1	8	L	3
11	43	126	1	0	1	6	L	3
11	43	127	2	0	1	4	R	4
11	43	128	3	0	1	2	L	3
11	44	129	1	0	1	4	R	4
11	44	130	2	0	1	4	L	3
11	44	131	3	0	1	3	L	3
11	45	132	1	1	2	105	L	3
11	45	133	2	1	2	73	R	4
11	45	134	3	1	2	68	L	3
11	46	135	1	0	1	6	L	3
11	46	136	2	0	1	4	R	4
11	46	137	3	0	1	9	R	4
11	47	138	1	0	1	3	L	3
11	47	139	2	1	2	34	L	3
11	47	140	3	1	2	148	R	4
11	50	141	1	0	1	3	L	3
11	50	142	2	1	2	54	L	3
11	50	143	3	0	1	2	L	3
11	51	147	1	1	2	82	R	4
11	51	148	2	1	2	220	R	4
11	51	149	3	1	2	75	R	4
11	52	144	1	1	2	6	L	3
11	52	145	2	2	3	9	R	4
11	52	146	3	3	4	40	R	4
11	55	150	1	0	1	3	L	3
11	55	151	2	1	2	54	L	3
11	55	152	3	0	1	2	L	3
11	56	153	1	0	1	6	L	3
11	56	154	2	0	1	9	R	4
11	56	155	3	1	2	40	R	4
11	57	156	1	1	2	82	R	4
11	57	157	2	1	2	220	R	4
11	57	158	3	1	2	75	R	4
12	1	1	1	1	2	4	L	3
12	1	2	2	2	3	161	R	4
12	1	3	3	2	3	1	R	4
12	2	4	1	1	2	44	L	3
12	2	5	2	1	2	41	L	3
12	2	6	3	0	1	1	R	4
12	3	7	1	1	2	97	R	4
12	3	8	2	0	1	6	R	4
12	3	9	3	0	1	3	R	4
12	4	10	1	0	1	3	R	4
12	4	11	2	1	2	38	L	3
12	4	12	3	1	2	57	L	3
12	5	13	1	1	2	158	R	4
12	5	14	2	0	1	2	R	4
12	5	15	3	1	2	117	R	4
12	6	16	1	1	2	60	R	4
12	6	17	2	0	1	6	L	3
12	6	18	3	1	2	77	L	3
12	7	19	1	2	3	168	L	3
12	7	20	2	0	1	4	L	3
12	7	21	3	0	1	5	R	4
12	8	22	1	1	2	62	L	3
12	8	23	2	0	1	6	R	4
12	8	24	3	0	1	5	R	4
12	9	25	1	0	1	5	L	3
12	9	26	2	0	1	102	R	4
12	9	27	3	0	1	6	R	4
12	10	28	1	1	2	106	R	4
12	10	29	2	0	1	5	R	4
12	10	30	3	0	1	6	R	4
12	11	31	1	2	3	145	R	4
12	11	32	2	0	1	5	L	3
12	12	33	1	0	1	4	R	4
12	12	34	2	1	2	156	L	3
12	12	35	3	0	1	6	R	4
12	13	36	1	1	2	104	L	3
12	13	37	2	0	1	4	R	4
12	13	38	3	1	2	133	L	3
12	14	39	1	1	2	91	L	3
12	14	40	2	2	3	202	L	3
12	15	42	1	0	1	33	L	3
12	15	43	2	1	2	39	R	4
12	15	44	3	0	1	2	L	3
12	16	45	1	1	2	76	R	4
12	16	46	2	0	1	6	L	3
12	16	47	3	0	1	4	R	4
12	17	48	1	0	1	6	R	4
12	17	49	2	1	2	85	L	3
12	17	50	3	3	4	5	L	3
12	18	51	1	0	1	5	R	4
12	18	52	2	0	1	6	R	4
12	18	53	3	0	1	10	R	4
12	19	54	1	1	2	4	L	3
12	19	55	2	2	3	161	R	4
12	19	56	3	2	3	1	R	4
12	20	57	1	1	2	44	L	3
12	20	58	2	1	2	41	L	3
12	20	59	3	0	1	1	R	4
12	21	60	1	1	2	97	R	4
12	21	61	2	0	1	6	R	4
12	21	62	3	0	1	3	R	4
12	22	63	1	0	1	3	R	4
12	22	64	2	1	2	38	L	3
12	22	65	3	1	2	57	L	3
12	23	66	1	1	2	158	R	4
12	23	67	2	0	1	2	R	4
12	24	68	1	1	2	60	R	4
12	24	69	2	0	1	6	L	3
12	24	70	3	1	2	77	L	3
12	25	71	1	0	1	9	R	4
12	25	72	2	1	2	52	R	4
12	25	73	3	1	2	37	L	3
12	26	74	1	0	1	12	R	4
12	26	75	2	0	1	7	L	3
12	26	76	3	0	1	17	L	3
12	27	77	1	1	2	45	R	4
12	27	78	2	0	1	3	L	3
12	27	79	3	0	1	3	L	3
12	28	80	1	1	2	60	R	4
12	28	81	2	1	2	94	R	4
12	28	82	3	3	4	142	R	4
12	29	83	1	0	1	4	L	3
12	29	84	2	0	1	3	L	3
12	29	85	3	0	1	9	L	3
12	30	86	1	1	2	74	R	4
12	30	87	2	0	1	7	R	4
12	30	88	3	1	2	254	R	4
12	31	89	1	1	2	63	L	3
12	31	90	2	0	1	4	L	3
12	31	91	3	1	2	97	R	4
12	32	92	1	1	2	43	L	3
12	32	93	2	1	2	64	L	3
12	32	94	3	0	1	6	R	4
12	33	95	1	1	2	95	R	4
12	33	96	2	0	1	3	R	4
12	33	97	3	0	1	4	L	3
12	34	98	1	0	1	3	R	4
12	34	99	2	0	1	11	R	4
12	34	100	3	0	1	9	R	4
12	35	101	1	0	1	7	R	4
12	35	102	2	0	1	7	L	3
12	35	103	3	0	1	5	R	4
12	36	104	1	1	2	48	L	3
12	36	105	2	1	2	115	L	3
12	36	106	3	0	1	18	R	4
12	37	107	1	0	1	5	R	4
12	37	108	2	1	2	88	L	3
12	37	109	3	1	2	105	L	3
12	38	110	1	0	1	5	R	4
12	38	111	2	0	1	4	L	3
12	38	112	3	0	1	5	L	3
12	39	113	1	0	1	27	R	4
12	39	114	2	0	1	15	R	4
12	39	115	3	0	1	3	L	3
12	40	116	1	0	1	14	L	3
12	40	117	2	1	2	85	L	3
12	40	118	3	1	2	40	R	4
12	41	119	1	1	2	97	R	4
12	41	120	2	0	1	2	R	4
12	41	121	3	1	2	79	L	3
12	42	122	1	1	2	51	L	3
12	42	123	2	1	2	55	L	3
12	42	124	3	0	1	7	R	4
12	43	125	1	1	2	89	L	3
12	43	126	2	1	2	47	L	3
12	43	127	3	0	1	2	R	4
12	44	128	1	1	2	82	L	3
12	44	129	2	1	2	86	R	4
12	44	130	3	0	1	3	R	4
12	45	131	1	0	1	4	R	4
12	45	132	2	0	1	4	R	4
12	45	133	3	0	1	6	L	3
12	48	134	1	1	2	77	R	4
12	48	135	2	1	2	44	R	4
12	48	136	3	0	1	9	L	3
12	49	137	1	0	1	7	R	4
12	49	138	2	0	1	5	L	3
12	49	139	3	0	1	47	L	3
12	51	143	1	1	2	128	R	4
12	51	144	2	0	1	15	R	4
12	51	145	3	1	2	58	R	4
12	52	140	1	0	1	32	L	3
12	52	141	2	1	2	31	R	4
12	52	142	3	1	2	34	L	3
12	53	146	1	1	2	77	R	4
12	53	147	2	1	2	44	R	4
12	53	148	3	0	1	9	L	3
12	54	149	1	0	1	7	R	4
12	54	150	2	0	1	5	L	3
12	54	151	3	0	1	47	L	3
12	56	152	1	0	1	32	L	3
12	56	153	2	1	2	31	R	4
12	56	154	3	1	2	34	L	3
12	57	155	1	1	2	128	R	4
12	57	156	2	0	1	15	R	4
12	57	157	3	1	2	58	R	4
12	58	158	1	0	1	5	R	4
12	58	159	2	1	2	67	R	4
12	58	160	3	0	1	6	L	3
13	3	1	1	0	1	10	L	3
13	3	2	2	0	1	19	L	3
13	3	3	3	0	1	185	R	4
13	6	4	1	0	1	44	R	4
13	6	5	2	0	1	47	L	3
13	6	6	3	5	6	393	R	4
13	7	7	1	0	1	10	L	3
13	7	8	2	0	1	4	R	4
13	7	9	3	0	1	4	R	4
13	8	10	1	0	1	12	L	3
13	8	11	2	1	2	104	R	4
13	8	12	3	1	2	56	L	3
13	9	13	1	1	2	75	R	4
13	9	14	2	1	2	76	L	3
13	9	15	3	3	4	315	L	3
13	10	16	1	0	1	4	R	4
13	10	17	2	0	1	6	L	3
13	10	18	3	0	1	4	R	4
13	11	19	1	1	2	86	R	4
13	11	20	2	1	2	108	L	3
13	12	21	1	1	2	152	L	3
13	12	22	2	1	2	110	L	3
13	12	23	3	1	2	81	L	3
13	13	24	1	0	1	5	L	3
13	13	25	2	0	1	6	R	4
13	13	26	3	0	1	5	R	4
13	14	27	1	0	1	4	R	4
13	14	28	2	0	1	5	R	4
13	14	29	3	0	1	6	L	3
13	15	30	2	0	1	28	R	4
13	15	31	3	0	1	22	R	4
13	17	32	1	0	1	3	R	4
13	17	33	2	1	2	51	L	3
13	17	34	3	1	2	75	L	3
13	18	35	1	1	2	102	R	4
13	18	36	2	1	2	148	R	4
13	18	37	3	1	2	72	L	3
13	21	38	1	0	1	10	L	3
13	21	39	2	0	1	19	L	3
13	21	40	3	0	1	185	R	4
13	24	41	1	0	1	44	R	4
13	24	42	2	0	1	47	L	3
13	24	43	3	5	6	393	R	4
13	25	44	1	5	6	15	R	4
13	25	45	2	0	1	19	R	4
13	25	46	3	1	2	98	L	3
13	26	47	1	3	4	170	R	4
13	26	48	2	0	1	4	L	3
13	26	49	3	0	1	3	L	3
13	27	50	1	0	1	35	L	3
13	27	51	2	0	1	20	L	3
13	27	52	3	0	1	33	L	3
13	28	53	1	0	1	2	L	3
13	28	54	2	2	3	104	R	4
13	28	55	3	3	4	160	R	4
13	29	56	1	0	1	4	L	3
13	29	57	2	0	1	5	L	3
13	29	58	3	3	4	94	R	4
13	30	59	1	0	1	42	R	4
13	30	60	2	0	1	3	L	3
13	30	61	3	1	2	36	R	4
13	31	62	1	0	1	3	L	3
13	31	63	2	1	2	137	L	3
13	31	64	3	0	1	8	L	3
13	33	65	1	0	1	7	L	3
13	33	66	2	0	1	18	R	4
13	33	67	3	0	1	53	L	3
13	34	68	1	1	2	70	L	3
13	34	69	2	0	1	12	R	4
13	34	70	3	0	1	4	L	3
13	35	71	1	1	2	71	L	3
13	35	72	2	0	1	3	L	3
13	35	73	3	1	2	71	R	4
13	36	74	1	0	1	7	R	4
13	36	75	2	1	2	57	R	4
13	36	76	3	0	1	5	L	3
13	37	77	1	0	1	4	L	3
13	37	78	2	0	1	6	R	4
13	37	79	3	0	1	4	L	3
13	38	80	1	2	3	03:29:00	R	4
13	38	81	2	0	1	5	L	3
13	38	82	3	0	1	5	L	3
13	39	83	1	0	1	6	L	3
13	39	84	2	2	3	195	R	4
13	39	85	3	1	2	66	L	3
13	40	86	1	1	2	75	R	4
13	40	87	2	0	1	9	L	3
13	40	88	3	0	1	7	L	3
13	41	89	1	1	2	272	R	4
13	41	90	2	0	1	5	L	3
13	41	91	3	2	3	137	L	3
13	42	92	1	2	3	90	R	4
13	42	93	2	1	2	180	R	4
13	42	94	3	0	1	4	L	3
13	43	95	1	1	2	120	R	4
13	43	96	2	0	1	5	R	4
13	43	97	3	1	2	84	L	3
13	44	98	1	0	1	14	R	4
13	44	99	2	0	1	5	R	4
13	44	100	3	0	1	5	R	4
13	45	101	1	0	1	35	L	3
13	45	102	2	3	4	32	R	4
13	46	103	1	0	1	6	R	4
13	46	104	2	1	2	73	L	3
13	46	105	3	0	1	3	L	3
13	48	106	1	2	3	228	R	4
13	48	107	2	1	2	184	L	3
13	48	108	3	0	1	12	R	4
13	50	109	1	2	3	281	L	3
13	50	110	2	1	2	16	L	3
13	51	114	1	0	1	28	L	3
13	51	115	2	0	1	3	L	3
13	51	116	3	0	1	7	L	3
13	52	111	1	1	2	76	L	3
13	52	112	2	1	2	62	R	4
13	52	113	3	0	1	7	R	4
13	53	117	1	2	3	228	R	4
13	53	118	2	1	2	184	L	3
13	53	119	3	0	1	12	R	4
13	55	120	1	2	3	281	L	3
13	55	121	2	1	2	16	L	3
13	56	122	1	1	2	76	L	3
13	56	123	2	1	2	62	R	4
13	56	124	3	0	1	7	R	4
13	57	125	1	0	1	28	L	3
13	57	126	2	0	1	3	L	3
13	57	127	3	0	1	7	L	3
13	58	128	1	1	2	113	L	3
13	58	129	2	0	1	8	R	4
13	58	130	3	0	1	5	R	4
14	1	1	1	2	3	127	R	4
14	1	2	2	2	3	4	R	4
14	1	3	3	2	3	3	R	4
14	2	4	1	1	2	225	R	4
14	2	5	2	0	1	3	L	3
14	2	6	3	0	1	4	R	4
14	3	7	1	0	1	4	R	4
14	3	8	2	0	1	4	L	3
14	3	9	3	1	2	107	R	4
14	4	10	1	1	2	109	R	4
14	4	11	2	3	4	230	L	3
14	4	12	3	0	1	5	R	4
14	5	13	1	3	4	390	L	3
14	5	14	2	0	1	10	L	3
14	5	15	3	0	1	50	R	4
14	6	16	1	1	2	240	L	3
14	6	17	2	0	1	17	L	3
14	6	18	3	1	2	126	R	4
14	7	19	1	1	2	121	R	4
14	7	20	2	0	1	8	L	3
14	7	21	3	0	1	4	L	3
14	8	22	1	0	1	8	R	4
14	8	23	2	1	2	202	L	3
14	8	24	3	0	1	7	L	3
14	9	25	1	2	3	226	R	4
14	9	26	2	0	1	10	L	3
14	9	27	3	0	1	71	L	3
14	10	28	1	0	1	8	L	3
14	10	29	2	0	1	6	L	3
14	10	30	3	0	1	6	R	4
14	11	31	1	2	3	236	R	4
14	11	32	2	0	1	59	L	3
14	12	33	1	5	6	18:54:00	L	3
14	12	34	2	1	2	04:41:00	L	3
14	12	35	3	2	3	05:54:00	L	3
14	13	36	1	0	1	8	L	3
14	13	37	2	1	2	90	R	4
14	13	38	3	0	1	5	R	4
14	14	39	1	2	3	252	R	4
14	14	40	2	0	1	3	R	4
14	14	41	3	2	3	294	L	3
14	15	42	1	2	3	266	R	4
14	15	43	2	0	1	6	R	4
14	15	44	3	0	1	18	L	3
14	16	45	1	0	1	10	L	3
14	16	46	2	0	1	7	R	4
14	16	47	3	0	1	5	R	4
14	17	48	1	1	2	446	L	3
14	17	49	2	0	1	21	L	3
14	17	50	3	0	1	11	L	3
14	18	51	1	0	1	6	R	4
14	18	52	2	0	1	3	L	3
14	18	53	3	5	6	516	R	4
14	19	54	1	2	3	127	R	4
14	19	55	2	2	3	4	R	4
14	19	56	3	2	3	3	R	4
14	20	57	1	1	2	225	R	4
14	20	58	2	0	1	3	L	3
14	20	59	3	0	1	4	R	4
14	21	60	1	0	1	4	R	4
14	21	61	2	0	1	4	L	3
14	21	62	3	1	2	107	R	4
14	22	63	1	1	2	109	R	4
14	22	64	2	3	4	230	L	3
14	22	65	3	0	1	5	R	4
14	23	66	1	3	4	390	L	3
14	23	67	2	0	1	10	L	3
14	23	68	3	0	1	50	R	4
14	24	69	1	1	2	240	L	3
14	24	70	2	0	1	17	L	3
14	24	71	3	1	2	126	R	4
14	25	72	1	1	2	221	R	4
14	25	73	2	1	2	122	L	3
14	25	74	3	0	1	3	L	3
14	26	75	1	0	1	3	L	3
14	26	76	2	0	1	1	L	3
14	26	77	3	0	1	3	L	3
14	27	78	1	0	1	9	L	3
14	27	79	2	0	1	7	R	4
14	27	80	3	0	1	6	L	3
14	28	81	1	1	2	76	L	3
14	28	82	2	0	1	7	R	4
14	28	83	3	0	1	5	L	3
14	29	84	1	1	2	167	R	4
14	29	85	2	1	2	72	R	4
14	29	86	3	4	5	719	R	4
14	30	87	1	0	1	10	R	4
14	30	88	2	1	2	116	R	4
14	30	89	3	1	2	201	L	3
14	31	90	1	1	2	128	R	4
14	31	91	2	1	2	93	R	4
14	31	92	3	0	1	6	L	3
14	32	93	1	1	2	123	R	4
14	32	94	2	1	2	155	L	3
14	32	95	3	1	2	59	L	3
14	33	96	1	0	1	13	R	4
14	33	97	2	1	2	46	L	3
14	33	98	3	1	2	85	R	4
14	35	99	1	0	1	5	L	3
14	35	100	2	1	2	182	R	4
14	35	101	3	0	1	3	R	4
14	36	102	1	1	2	162	R	4
14	36	103	2	1	2	137	R	4
14	36	104	3	0	1	5	L	3
14	37	105	1	1	2	148	R	4
14	37	106	2	0	1	4	L	3
14	37	107	3	1	2	166	R	4
14	38	108	1	0	1	10	R	4
14	38	109	2	1	2	57	R	4
14	38	110	3	0	1	3	L	3
14	39	111	1	1	2	251	R	4
14	39	112	2	0	1	2	L	3
14	39	113	3	2	3	257	R	4
14	40	114	1	0	1	5	R	4
14	40	115	2	1	2	146	R	4
14	40	116	3	1	2	207	L	3
14	41	117	1	1	2	39	R	4
14	41	118	2	0	1	3	R	4
14	41	119	3	1	2	107	L	3
14	42	120	1	1	2	04:16:00	R	4
14	42	121	2	0	1	21	R	4
14	42	122	3	1	2	115	L	3
14	43	123	1	1	2	132	L	3
14	43	124	2	0	1	3	L	3
14	43	125	3	0	1	28	R	4
14	45	126	1	2	3	436	R	4
14	45	127	2	1	2	34	L	3
14	45	128	3	0	1	4	R	4
14	46	129	1	0	1	9	R	4
14	46	130	2	3	4	521	R	4
14	46	131	3	1	2	392	L	3
14	47	132	1	1	2	137	R	4
14	47	133	2	3	4	336	R	4
14	47	134	3	2	3	65	L	3
14	49	135	1	1	2	108	R	4
14	49	136	2	1	2	654	R	4
14	49	137	3	0	1	3	L	3
14	51	141	1	1	2	108	L	3
14	51	142	2	3	4	108	R	4
14	51	143	3	1	2	77	L	3
14	52	138	1	3	4	66	R	4
14	52	139	2	4	5	8	L	3
14	52	140	3	4	5	152	L	3
14	54	144	1	1	2	108	R	4
14	54	145	2	1	2	654	R	4
14	54	146	3	0	1	3	L	3
14	56	147	1	1	2	66	R	4
14	56	148	2	0	1	8	L	3
14	56	149	3	1	2	152	L	3
14	57	150	1	1	2	108	L	3
14	57	151	2	3	4	108	R	4
14	57	152	3	1	2	77	L	3
14	58	153	1	0	1	6	L	3
14	58	154	2	0	1	4	L	3
14	58	155	3	0	1	11	R	4
15	1	1	1	2	3	262	R	4
15	1	2	2	3	4	282	R	4
15	1	3	3	2	3	87	L	3
15	2	4	1	0	1	8	L	3
15	2	5	2	0	1	15	R	4
15	2	6	3	0	1	11	R	4
15	3	7	1	1	2	323	R	4
15	3	8	2	0	1	19	L	3
15	3	9	3	1	2	283	L	3
15	4	10	1	2	3	444	L	3
15	4	11	2	1	2	150	L	3
15	4	12	3	3	4	433	L	3
15	5	13	1	0	1	3	L	3
15	5	14	2	3	4	435	R	4
15	5	15	3	1	2	142	R	4
15	6	16	1	0	1	8	L	3
15	6	17	2	0	1	17	L	3
15	6	18	3	0	1	4	L	3
15	7	19	1	5	6	682	R	4
15	7	20	2	2	3	423	R	4
15	7	21	3	0	1	14	L	3
15	8	22	1	0	1	74	R	4
15	8	23	2	2	3	356	R	4
15	9	25	1	1	2	221	L	3
15	9	26	2	0	1	4	L	3
15	9	27	3	4	5	470	R	4
15	10	28	1	0	1	7	L	3
15	12	32	1	0	1	7	R	4
15	12	33	2	1	2	06:48:00	L	3
15	12	34	3	0	1	115	R	4
15	13	35	1	0	1	27	L	3
15	13	36	2	0	1	16	R	4
15	13	37	3	0	1	9	L	3
15	14	38	1	1	2	117	L	3
15	14	39	2	0	1	3	R	4
15	14	40	3	6	7	562	R	4
15	15	41	1	0	1	11	R	4
15	15	42	2	6	7	716	R	4
15	15	43	3	0	1	12	L	3
15	16	44	1	1	2	182	L	3
15	16	45	2	3	4	154	R	4
15	16	46	3	0	1	3	R	4
15	17	47	1	1	2	75	R	4
15	17	48	2	0	1	2	R	4
15	17	49	3	1	2	130	R	4
15	18	50	1	0	1	7	L	3
15	18	51	2	2	3	168	L	3
15	18	52	3	0	1	18	L	3
15	19	53	1	2	3	262	R	4
15	19	54	2	3	4	282	R	4
15	19	55	3	2	3	87	L	3
15	20	56	1	0	1	8	L	3
15	20	57	2	0	1	15	R	4
15	20	58	3	0	1	11	R	4
15	21	59	1	1	2	323	R	4
15	21	60	2	0	1	19	L	3
15	21	61	3	1	2	283	L	3
15	22	62	1	2	3	444	L	3
15	22	63	2	1	2	150	L	3
15	22	64	3	3	4	433	L	3
15	23	65	1	0	1	3	L	3
15	23	66	2	3	4	435	R	4
15	23	67	3	1	2	142	R	4
15	24	68	1	0	1	8	L	3
15	24	69	2	0	1	17	L	3
15	24	70	3	0	1	4	L	3
15	25	71	1	0	1	60	R	4
15	25	72	2	0	1	7	L	3
15	25	73	3	0	1	83	L	3
15	26	74	1	1	2	335	R	4
15	26	75	2	0	1	40	L	3
15	26	76	3	1	2	150	R	4
15	27	77	1	1	2	67	R	4
15	27	78	2	2	3	671	L	3
15	27	79	3	3	4	415	R	4
15	28	80	1	0	1	5	R	4
15	28	81	2	1	2	166	L	3
15	28	82	3	2	3	502	R	4
15	29	83	1	1	2	218	R	4
15	29	84	2	4	5	525	R	4
15	29	85	3	0	1	26	L	3
15	30	86	1	1	2	144	R	4
15	30	87	2	2	3	307	R	4
15	30	88	3	3	4	494	L	3
15	31	89	1	0	1	5	L	3
15	31	90	2	1	2	126	R	4
15	31	91	3	2	3	204	R	4
15	32	92	1	0	1	69	R	4
15	32	93	2	0	1	16	R	4
15	32	94	3	0	1	21	R	4
15	33	95	1	3	4	753	R	4
15	33	96	2	1	2	124	R	4
15	33	97	3	4	5	554	R	4
15	34	98	1	0	1	7	L	3
15	34	99	2	1	2	89	R	4
15	34	100	3	0	1	14	L	3
15	35	101	1	0	1	7	R	4
15	35	102	2	1	2	81	L	3
15	35	103	3	1	2	222	R	4
15	36	104	1	0	1	8	L	3
15	36	105	2	0	1	9	L	3
15	36	106	3	3	4	611	R	4
15	37	107	1	0	1	9	R	4
15	37	108	2	2	3	364	R	4
15	37	109	3	1	2	110	R	4
15	38	110	1	0	1	12	R	4
15	38	111	2	3	4	657	R	4
15	38	112	3	0	1	7	L	3
15	39	113	1	0	1	6	R	4
15	39	114	2	0	1	9	R	4
15	39	115	3	0	1	7	R	4
15	40	116	1	3	4	307	L	3
15	40	117	2	0	1	11	L	3
15	40	118	3	1	2	253	R	4
15	41	119	1	0	1	7	R	4
15	41	120	2	1	2	313	R	4
15	41	121	3	0	1	2	L	3
15	42	122	1	3	4	810	L	3
15	42	123	2	0	1	6	L	3
15	42	124	3	0	1	6	R	4
15	43	125	1	0	1	8	R	4
15	43	126	2	1	2	333	R	4
15	43	127	3	0	1	5	L	3
15	44	128	1	0	1	39	R	4
15	44	129	2	1	2	54	L	3
15	44	130	3	0	1	3	L	3
15	45	131	1	0	1	6	R	4
15	45	132	2	4	5	547	R	4
15	45	133	3	0	1	6	R	4
15	46	134	1	0	1	22	R	4
15	46	135	2	0	1	5	R	4
15	46	136	3	1	2	129	L	3
15	47	137	1	1	2	206	L	3
15	47	138	2	0	1	3	R	4
15	47	139	3	0	1	12	L	3
15	49	140	1	0	1	50	L	3
15	49	142	3	0	1	4	L	3
15	51	146	1	4	5	481	L	3
15	51	147	2	4	5	375	R	4
15	51	148	3	2	3	229	L	3
15	52	143	1	2	3	11	L	3
15	52	144	2	2	3	106	R	4
15	52	145	3	1	2	3	R	4
15	54	149	1	0	1	50	L	3
15	54	151	3	0	1	4	L	3
15	56	152	1	0	1	11	L	3
15	56	153	2	1	2	106	R	4
15	56	154	3	0	1	3	R	4
15	57	155	1	4	5	481	L	3
15	57	156	2	4	5	375	R	4
15	57	157	3	2	3	229	L	3
15	58	158	1	0	1	11	R	4
15	58	159	2	0	1	9	R	4
15	58	160	3	0	1	9	R	4
16	1	1	1	1	2	45	L	3
16	1	2	2	3	4	53	R	4
16	1	3	3	3	4	242	L	3
16	2	4	1	1	2	92	R	4
16	2	5	2	5	6	106	R	4
16	2	6	3	2	3	225	R	4
16	4	7	1	1	2	63	L	3
16	5	10	1	3	4	68	R	4
16	5	11	2	2	3	36	L	3
16	8	12	1	0	1	59	R	4
16	8	13	2	0	1	5	R	4
16	8	14	3	0	1	5	L	3
16	9	15	1	1	2	103	R	4
16	9	16	2	1	2	100	R	4
16	9	17	3	1	2	99	R	4
16	10	18	1	2	3	22	L	3
16	18	19	1	1	2	121	R	4
16	18	20	2	3	4	190	R	4
16	18	21	3	3	4	108	R	4
16	19	22	1	1	2	45	L	3
16	19	23	2	3	4	53	R	4
16	19	24	3	3	4	242	L	3
16	20	25	1	1	2	92	R	4
16	20	26	2	5	6	106	R	4
16	20	27	3	2	3	225	R	4
16	22	28	1	1	2	63	L	3
16	23	30	1	0	1	68	R	4
16	23	31	2	3	4	36	L	3
16	23	32	3	2	3	229	L	3
16	25	33	1	6	7	732	R	4
16	25	34	2	0	1	126	L	3
17	1	1	1	2	3	6	L	3
17	1	2	2	1	2	42	L	3
17	1	3	3	8	9	28	L	3
17	2	4	1	0	1	3	R	4
17	2	5	2	0	1	15	R	4
17	2	6	3	0	1	21	R	4
17	3	7	1	0	1	5	R	4
17	3	8	2	0	1	5	L	3
17	3	9	3	1	2	35	R	4
17	4	10	1	0	1	7	R	4
17	4	11	2	0	1	2	L	3
17	4	12	3	1	2	52	R	4
17	5	13	1	0	1	92	L	3
17	5	14	2	5	6	323	R	4
17	5	15	3	1	2	138	L	3
17	6	16	1	0	1	4	L	3
17	6	17	2	1	2	124	R	4
17	6	18	3	0	1	43	L	3
17	7	19	1	1	2	85	L	3
17	7	20	2	0	1	46	R	4
17	7	21	3	0	1	63	L	3
17	8	22	1	0	1	7	R	4
17	8	23	2	0	1	5	R	4
17	8	24	3	0	1	9	L	3
17	9	25	1	0	1	5	R	4
17	9	26	2	0	1	5	R	4
17	9	27	3	0	1	47	R	4
17	10	28	1	0	1	6	R	4
17	10	29	2	1	2	109	L	3
17	10	30	3	3	4	3	L	3
17	11	31	1	2	3	307	L	3
17	11	32	2	0	1	82	R	4
17	12	33	1	0	1	114	L	3
17	12	34	2	0	1	191	L	3
17	12	35	3	0	1	3	L	3
17	13	36	1	0	1	16	L	3
17	13	37	2	2	3	206	R	4
17	13	38	3	1	2	78	R	4
17	14	39	1	1	2	84	R	4
17	14	40	2	0	1	4	R	4
17	14	41	3	0	1	11	R	4
17	15	42	1	0	1	21	L	3
17	15	43	2	1	2	52	R	4
17	15	44	3	0	1	42	L	3
17	16	45	1	1	2	148	L	3
17	16	46	2	1	2	30	R	4
17	16	47	3	1	2	33	R	4
17	17	48	1	0	1	6	R	4
17	17	49	2	0	1	3	L	3
17	17	50	3	2	3	148	R	4
17	18	51	1	0	1	11	R	4
17	18	52	2	1	2	59	L	3
17	18	53	3	0	1	14	L	3
17	19	54	1	2	3	6	L	3
17	19	55	2	1	2	42	L	3
17	19	56	3	8	9	28	L	3
17	20	57	1	0	1	3	R	4
17	20	58	2	0	1	15	R	4
17	20	59	3	0	1	21	R	4
17	21	60	1	0	1	5	R	4
17	21	61	2	0	1	5	L	3
17	21	62	3	1	2	35	R	4
17	22	63	1	0	1	7	R	4
17	22	64	2	0	1	2	L	3
17	22	65	3	1	2	52	R	4
17	23	66	1	0	1	92	L	3
17	23	67	2	5	6	323	R	4
17	23	68	3	1	2	138	L	3
17	24	69	1	0	1	4	L	3
17	24	70	2	1	2	124	R	4
17	24	71	3	0	1	43	L	3
17	25	72	1	1	2	260	L	3
17	25	73	2	2	3	135	L	3
17	25	74	3	1	2	152	R	4
17	26	75	1	0	1	6	L	3
17	26	76	2	1	2	57	L	3
17	26	77	3	1	2	27	L	3
17	27	78	1	1	2	141	L	3
17	27	79	2	0	1	29	R	4
17	27	80	3	3	4	200	L	3
17	28	81	1	2	3	244	R	4
17	28	82	2	1	2	129	L	3
17	28	83	3	0	1	3	R	4
17	29	84	1	0	1	6	R	4
17	29	85	2	1	2	57	R	4
17	29	86	3	1	2	24	L	3
17	30	87	1	0	1	5	L	3
17	30	88	2	1	2	232	L	3
17	30	89	3	0	1	5	L	3
17	31	90	1	1	2	99	L	3
17	31	91	2	0	1	9	L	3
17	31	92	3	0	1	3	R	4
17	32	93	1	0	1	7	R	4
17	32	94	2	3	4	176	R	4
17	32	95	3	1	2	80	L	3
17	33	96	1	1	2	04:15:00	L	3
17	33	97	2	0	1	7	L	3
17	33	98	3	0	1	7	L	3
17	34	99	1	0	1	8	R	4
17	34	100	2	0	1	2	R	4
17	34	101	3	0	1	21	R	4
17	35	102	1	2	3	180	L	3
17	35	103	2	0	1	6	L	3
17	35	104	3	0	1	5	L	3
17	36	105	1	0	1	8	L	3
17	36	106	2	0	1	32	R	4
17	36	107	3	0	1	9	R	4
17	37	108	1	0	1	4	L	3
17	37	109	2	1	2	34	L	3
17	37	110	3	0	1	10	L	3
17	38	111	1	0	1	21	L	3
17	38	112	2	0	1	2	R	4
17	38	113	3	0	1	29	R	4
17	39	114	1	0	1	6	L	3
17	39	115	2	0	1	4	L	3
17	39	116	3	2	3	41	L	3
17	40	117	1	0	1	20	L	3
17	40	118	2	0	1	7	R	4
17	40	119	3	0	1	5	R	4
17	41	120	1	0	1	8	L	3
17	41	121	2	2	3	108	R	4
17	41	122	3	8	9	350	R	4
17	42	123	1	0	1	4	L	3
17	42	124	2	1	2	204	R	4
17	42	125	3	0	1	3	R	4
17	43	126	1	0	1	8	L	3
17	43	127	2	0	1	5	R	4
17	43	128	3	0	1	9	R	4
17	44	129	1	2	3	06:55:00	L	3
17	44	130	2	0	1	7	L	3
17	44	131	3	1	2	60	L	3
17	45	132	1	0	1	8	L	3
17	45	133	2	0	1	2	L	3
17	45	134	3	0	1	6	L	3
17	46	135	1	1	2	338	L	3
17	46	136	2	0	1	5	R	4
17	46	137	3	1	2	6	L	3
17	48	138	1	1	2	49	R	4
17	48	139	2	1	2	190	R	4
17	48	140	3	0	1	4	L	3
17	49	141	1	0	1	4	R	4
17	49	142	2	1	2	222	R	4
17	51	147	1	2	3	251	L	3
17	51	148	2	2	3	122	R	4
17	51	149	3	0	1	26	L	3
17	52	144	1	1	2	89	L	3
17	52	145	2	0	1	6	L	3
17	52	146	3	1	2	40	R	4
17	53	150	1	1	2	49	R	4
17	53	151	2	1	2	190	R	4
17	53	152	3	0	1	4	L	3
17	54	153	1	0	1	4	R	4
17	54	154	2	1	2	222	R	4
17	56	156	1	1	2	89	L	3
17	56	157	2	0	1	6	L	3
17	56	158	3	1	2	40	R	4
17	57	159	1	2	3	251	L	3
17	57	160	2	2	3	122	R	4
17	57	161	3	0	1	26	L	3
17	58	162	1	1	2	98	L	3
17	58	163	2	0	1	4	L	3
17	58	164	3	0	1	17	L	3
18	1	1	1	4	5	5	R	4
18	1	2	2	1	2	41	L	3
18	1	3	3	2	3	4	L	3
18	2	4	1	3	4	729	L	3
18	2	5	2	1	2	296	R	4
18	2	6	3	2	3	276	L	3
18	3	7	1	2	3	289	L	3
18	3	8	2	2	3	247	R	4
18	3	9	3	1	2	60	L	3
18	4	10	1	0	1	6	R	4
18	4	11	2	0	1	3	R	4
18	4	12	3	0	1	4	L	3
18	5	13	1	0	1	26	L	3
18	5	14	2	3	4	401	R	4
18	5	15	3	0	1	5	R	4
18	6	16	1	2	3	372	R	4
18	6	17	2	2	3	290	R	4
18	6	18	3	1	2	124	R	4
18	7	19	1	2	3	223	L	3
18	7	20	2	0	1	8	R	4
18	7	21	3	0	1	4	R	4
18	8	22	1	1	2	150	R	4
18	8	23	2	2	3	244	R	4
18	8	24	3	0	1	44	L	3
18	9	25	1	0	1	5	R	4
18	9	26	2	0	1	4	L	3
18	9	27	3	0	1	4	L	3
18	10	28	1	3	4	267	R	4
18	10	29	2	0	1	3	R	4
18	10	30	3	4	5	247	R	4
18	11	31	1	0	1	6	L	3
18	11	32	2	0	1	4	R	4
18	12	33	1	0	1	38	L	3
18	12	34	2	1	2	75	R	4
18	12	35	3	0	1	3	R	4
18	13	36	1	3	4	261	L	3
18	13	37	2	0	1	4	L	3
18	13	38	3	2	3	157	R	4
18	14	39	1	1	2	124	R	4
18	14	40	2	1	2	88	L	3
18	14	41	3	0	1	10	R	4
18	15	42	1	2	3	240	R	4
18	15	43	2	1	2	67	R	4
18	15	44	3	0	1	4	R	4
18	16	45	1	4	5	353	L	3
18	16	46	2	0	1	4	R	4
18	16	47	3	1	2	54	L	3
18	17	48	1	1	2	102	L	3
18	17	49	2	1	2	54	R	4
18	17	50	3	1	2	63	L	3
18	18	51	1	0	1	5	R	4
18	18	52	2	0	1	7	R	4
18	18	53	3	0	1	4	L	3
18	19	54	1	4	5	5	R	4
18	19	55	2	1	2	41	L	3
18	19	56	3	2	3	4	L	3
18	20	57	1	3	4	729	L	3
18	20	58	2	1	2	296	R	4
18	20	59	3	2	3	276	L	3
18	21	60	1	2	3	289	L	3
18	21	61	2	2	3	247	R	4
18	21	62	3	1	2	60	L	3
18	22	63	1	0	1	6	R	4
18	22	64	2	0	1	3	R	4
18	22	65	3	0	1	4	L	3
18	23	66	1	0	1	26	L	3
18	23	67	2	3	4	401	R	4
18	23	68	3	0	1	5	R	4
18	24	69	1	2	3	372	R	4
18	24	70	2	2	3	290	R	4
18	24	71	3	1	2	124	R	4
18	25	72	1	0	1	3	L	3
18	25	73	2	0	1	2	R	4
18	25	74	3	0	1	2	R	4
18	26	75	1	0	1	8	L	3
18	26	76	2	3	4	376	R	4
18	26	77	3	0	1	12	L	3
18	27	78	1	0	1	6	L	3
18	27	79	2	0	1	28	R	4
18	27	80	3	0	1	5	L	3
18	28	81	1	0	1	17	R	4
18	28	82	2	0	1	47	L	3
18	28	83	3	1	2	91	R	4
18	29	84	1	0	1	4	L	3
18	29	85	2	3	4	244	L	3
18	29	86	3	0	1	5	L	3
18	30	87	1	0	1	21	R	4
18	30	88	2	3	4	260	L	3
18	30	89	3	0	1	63	L	3
18	31	90	1	0	1	3	L	3
18	31	91	2	4	5	368	R	4
18	31	92	3	0	1	19	R	4
18	32	93	1	0	1	3	L	3
18	32	94	2	2	3	115	L	3
18	32	95	3	1	2	131	R	4
18	33	96	1	1	2	139	L	3
18	33	97	2	1	2	117	L	3
18	33	98	3	1	2	33	L	3
18	34	99	1	10	11	747	L	3
18	34	100	2	4	5	588	R	4
18	34	101	3	0	1	3	R	4
18	35	102	1	0	1	8	L	3
18	35	103	2	0	1	7	L	3
18	35	104	3	3	4	195	L	3
18	36	105	1	2	3	350	L	3
18	36	106	2	0	1	4	R	4
18	36	107	3	0	1	6	L	3
18	37	108	1	4	5	523	R	4
18	37	109	2	1	2	43	R	4
18	37	110	3	1	2	32	R	4
18	38	111	1	0	1	8	R	4
18	38	112	2	0	1	3	L	3
18	38	113	3	0	1	15	L	3
18	39	114	1	1	2	64	L	3
18	39	115	2	0	1	13	L	3
18	39	116	3	1	2	42	L	3
18	40	117	1	0	1	7	L	3
18	40	118	2	1	2	182	R	4
18	40	119	3	1	2	84	L	3
18	41	120	1	0	1	6	R	4
18	41	121	2	1	2	75	L	3
18	41	122	3	1	2	96	L	3
18	42	123	1	2	3	153	L	3
18	42	124	2	0	1	5	R	4
18	42	125	3	1	2	121	L	3
18	43	126	1	2	3	352	L	3
18	43	127	2	0	1	8	R	4
18	43	128	3	0	1	7	L	3
18	44	129	1	0	1	7	L	3
18	44	130	2	0	1	3	R	4
18	44	131	3	1	2	42	L	3
18	45	132	1	0	1	4	L	3
18	45	133	2	0	1	5	L	3
18	45	134	3	1	2	79	L	3
18	46	135	1	0	1	6	R	4
18	46	136	2	2	3	270	L	3
18	46	137	3	1	2	73	L	3
18	48	138	1	0	1	7	R	4
18	48	139	2	3	4	300	R	4
18	48	140	3	1	2	7	L	3
18	50	141	1	0	1	10	L	3
18	50	142	2	3	4	276	L	3
18	50	143	3	1	2	136	R	4
18	51	147	1	2	3	254	L	3
18	51	148	2	1	2	92	L	3
18	51	149	3	1	2	113	R	4
18	52	144	1	0	1	7	L	3
18	52	145	2	2	3	204	R	4
18	52	146	3	0	1	5	R	4
18	53	150	1	0	1	7	R	4
18	53	151	2	3	4	300	R	4
18	53	152	3	1	2	7	L	3
18	55	153	1	0	1	10	L	3
18	55	154	2	3	4	276	L	3
18	55	155	3	1	2	136	R	4
18	56	156	1	0	1	7	L	3
18	56	157	2	2	3	204	R	4
18	56	158	3	0	1	5	R	4
18	57	159	1	2	3	254	L	3
18	57	160	2	1	2	92	L	3
18	57	161	3	1	2	113	R	4
18	58	162	1	1	2	67	L	3
18	58	163	2	0	1	6	L	3
18	58	164	3	0	1	7	R	4

## Sheet: reversal timings
snake	orev1	orev2	orev3	vrev1	vrev2	vrev3
1	42	61	68	83	87	91
2	42	61	71	84	88	94
3	42	54	60	80	85	88
4	42	53	70	82	88	93
5	42	53	66	86	88	96
7	42	53	66	80	87	94
8	42	64	70	86	88	94
10	42	54	56	80	88	94

## Sheet: reversal grads
snake	grad	trial
1	1	70
2	1	57
3	1	64
4	1	39
5	1	52
7	1	17
8	1	36
10	1	54
1	2	20
2	2	52
3	2	13
4	2	26
5	2	20
7	2	17
8	2	46
10	2	18
1	3	14
2	3	10
3	3	10
4	3	19
5	3	12
7	3	16
8	3	15
10	3	19
1	4	15
2	4	14
3	4	19
4	4	21
5	4	12
7	4	12
8	4	11
10	4	9

## Sheet: expt 1 session errors and times
snake	session	errors.by.session	time
1	1	3	488
1	2	1	624
1	3	1	150
1	4	2	342
1	6	2	272
1	7	1	61
1	8	4	724
1	9	2	166
1	10	3	134
1	11	1	133
1	12	4	14
1	13	3	154
1	14	1	11
1	15	5	22
1	16	2	12
1	17	2	70
1	18	2	38
1	19	0	131
1	20	0	56
1	21	1	11
1	22	0	13
1	23	1	10
1	24	0	152
1	25	2	10
1	26	1	9
1	27	0	110
1	28	0	15
1	29	0	48
1	30	0	23
1	31	0	12
1	32	2	17
1	33	0	208
1	34	1	14
1	35	0	166
1	36	0	54
1	37	0	17
1	38	1	11
1	39	0	541
1	40	0	121
1	41	0	171
1	42	0	55
1	43	8	20
1	44	1	202
1	45	2	241
1	46	1	106
1	48	0	57
1	49	1	784
1	50	2	247
1	51	2	79
1	54	0	189
1	55	5	11
1	56	1	86
1	57	1	12
1	58	2	89
1	59	0	147
1	60	0	237
1	61	1	62
1	62	2	17
1	63	3	23
1	65	1	87
1	66	0	167
1	67	0	64
1	68	2	43
1	69	3	13
1	70	0	90
1	71	0	73
1	73	1	149
1	74	1	64
1	75	2	81
1	76	1	285
1	77	1	109
1	78	3	421
1	79	2	68
1	80	1	66
1	81	1	97
1	82	0	76
1	83	1	61
1	84	1	19
1	85	0	16
1	86	0	13
1	87	0	14
1	88	0	22
1	89	0	196
1	90	0	16
1	91	0	29
1	92	1	81
1	94	0	17
1	95	0	48
2	1	0	106
2	2	5	276
2	3	3	143
2	4	0	273
2	6	0	226
2	7	8	325
2	8	3	16
2	9	0	17
2	10	4	135
2	11	3	86
2	12	2	80
2	13	5	682
2	14	3	75
2	15	2	24
2	16	2	14
2	17	3	14
2	18	2	13
2	19	3	174
2	20	0	15
2	21	0	13
2	22	1	17
2	23	0	12
2	24	0	788
2	25	1	10
2	26	0	64
2	27	0	15
2	28	1	13
2	29	0	12
2	30	0	21
2	31	0	38
2	32	0	66
2	33	0	65
2	34	0	33
2	35	1	347
2	36	0	91
2	37	0	15
2	38	0	25
2	39	0	448
2	40	0	322
2	41	0	224
2	42	0	114
2	43	9	59
2	44	3	52
2	45	2	525
2	46	0	86
2	48	2	101
2	49	1	37
2	50	3	48
2	51	3	17
2	52	0	106
2	53	0	465
2	55	0	114
2	57	1	73
2	58	5	19
2	59	1	41
2	60	1	17
2	61	1	16
2	62	0	184
2	63	2	20
2	65	2	125
2	66	3	136
2	67	2	74
2	69	1	13
2	70	1	85
2	71	2	85
2	73	1	42
2	74	0	142
2	75	1	67
2	76	0	18
2	77	1	17
2	78	4	88
2	79	2	65
2	81	2	79
2	82	4	66
2	83	2	16
2	84	1	94
2	85	1	98
2	86	0	96
2	87	0	18
2	88	2	96
2	90	0	18
2	91	0	18
2	92	0	70
2	94	2	22
2	95	0	330
2	96	1	923
3	1	4	488
3	2	3	262
3	3	1	430
3	5	0	230
3	7	2	285
3	8	4	125
3	9	3	235
3	10	3	121
3	11	10	242
3	12	6	610
3	13	3	33
3	14	0	153
3	15	5	111
3	16	1	13
3	17	1	14
3	18	4	220
3	19	1	14
3	20	1	32
3	21	2	119
3	22	0	16
3	23	0	602
3	24	1	18
3	25	0	41
3	26	0	17
3	27	0	13
3	28	0	37
3	29	0	165
3	30	1	27
3	31	0	97
3	32	0	157
3	33	0	12
3	35	1	289
3	37	0	62
3	38	0	37
3	39	0	17
3	40	1	565
3	42	0	155
3	43	0	178
3	44	10	34
3	45	1	115
3	46	0	124
3	48	1	271
3	49	2	249
3	50	1	28
3	51	1	113
3	52	0	846
3	53	1	264
3	54	1	144
3	55	0	76
3	56	1	74
3	57	0	26
3	58	6	216
3	59	1	165
3	60	8	240
3	61	0	110
3	62	1	82
3	63	2	76
3	72	0	155
3	73	1	79
3	74	0	638
3	75	0	18
3	76	0	77
3	77	1	19
3	78	3	66
3	79	3	399
3	80	1	226
3	81	1	178
3	82	1	302
3	83	0	320
3	84	0	87
3	85	0	405
3	86	1	145
3	87	1	66
3	88	0	21
3	89	0	173
3	90	0	25
3	91	0	22
3	92	0	21
4	1	0	155
4	2	3	36
4	3	1	36
4	4	5	57
4	6	3	21
4	7	4	14
4	8	2	17
4	9	4	18
4	10	1	70
4	11	0	330
4	12	1	916
4	13	5	588
4	14	3	312
4	15	2	18
4	16	3	472
4	17	2	86
4	18	0	128
4	19	0	297
4	20	1	78
4	21	0	105
4	22	1	332
4	23	0	127
4	24	0	17
4	25	1	12
4	26	0	90
4	27	1	17
4	28	0	14
4	29	0	10
4	30	0	12
4	31	1	15
4	32	0	54
4	33	0	16
4	34	0	14
4	35	2	20
4	36	0	9
4	37	0	52
4	38	1	61
4	39	0	24
4	40	0	15
4	41	0	149
4	42	0	16
4	43	7	16
4	44	5	658
4	45	2	380
4	48	1	157
4	49	2	62
4	50	0	124
4	51	0	79
4	52	0	361
4	53	0	46
4	54	0	111
4	55	2	15
4	56	1	44
4	57	1	12
4	60	3	960
4	61	1	310
4	62	1	882
4	63	1	10
4	64	0	69
4	67	1	147
4	68	1	83
4	69	2	22
4	71	0	15
4	72	1	259
4	73	0	13
4	74	0	86
4	75	1	187
4	76	0	101
4	77	1	67
4	78	1	78
4	79	0	67
4	80	1	13
4	81	1	210
4	82	1	13
4	83	2	19
4	84	0	91
4	86	0	65
4	87	0	15
4	88	0	19
4	89	1	13
4	90	0	15
4	91	1	16
4	92	0	15
4	93	0	187
4	95	2	78
4	96	0	28
5	1	2	56
5	2	0	45
5	3	4	184
5	4	4	64
5	6	3	110
5	7	5	305
5	8	6	241
5	9	1	222
5	10	3	151
5	11	3	182
5	12	1	12
5	13	1	15
5	14	3	466
5	15	1	52
5	16	2	13
5	17	0	53
5	18	2	13
5	19	1	11
5	20	0	127
5	21	1	10
5	22	1	33
5	23	0	9
5	24	1	10
5	25	0	92
5	26	0	11
5	27	0	57
5	28	0	9
5	29	0	10
5	30	0	9
5	31	0	139
5	32	0	12
5	33	0	14
5	34	1	30
5	35	0	9
5	36	0	840
5	37	0	9
5	38	0	9
5	39	0	28
5	40	0	327
5	41	0	250
5	42	0	123
5	43	7	112
5	44	5	141
5	45	3	22
5	46	0	15
5	48	1	9
5	49	1	174
5	50	0	62
5	51	0	198
5	52	0	376
5	53	0	202
5	54	0	194
5	55	2	71
5	56	0	77
5	57	1	73
5	59	0	84
5	60	1	86
5	61	1	12
5	62	0	17
5	63	0	14
5	64	0	217
5	65	0	68
5	66	0	42
5	67	4	64
5	68	0	73
5	69	1	65
5	73	1	63
5	74	1	78
5	75	0	69
5	76	3	60
5	78	1	126
5	79	1	16
5	80	2	54
5	81	0	31
5	82	2	14
5	84	1	78
5	85	2	29
5	86	1	76
5	87	0	17
5	88	0	140
5	89	0	224
5	91	0	32
5	93	0	17
5	94	0	17
5	95	0	83
5	96	0	17
7	1	1	15
7	2	4	1277
7	3	3	284
7	4	2	177
7	5	1	52
7	7	1	144
7	8	0	236
7	9	1	93
7	10	1	124
7	11	1	27
7	12	10	193
7	13	2	63
7	14	1	38
7	15	1	18
7	16	3	74
7	17	0	83
7	18	1	10
7	19	0	56
7	21	4	16
7	22	0	16
7	23	0	56
7	24	1	13
7	25	1	13
7	26	1	935
7	27	0	23
7	28	1	12
7	29	0	11
7	30	0	20
7	31	1	88
7	32	1	77
7	33	0	12
7	34	0	25
7	36	0	24
7	37	1	9
7	38	0	386
7	39	2	13
7	40	1	9
7	41	0	13
7	42	0	430
7	43	1	969
7	44	6	161
7	45	5	33
7	48	2	50
7	49	0	108
7	50	0	14
7	51	1	21
7	52	0	24
7	53	0	203
7	55	0	104
7	56	1	239
7	57	2	179
7	58	2	89
7	59	0	64
7	60	2	217
7	61	1	18
7	62	1	19
7	64	0	14
7	65	0	14
7	66	1	160
7	67	0	65
7	68	1	73
7	73	0	132
7	74	0	72
7	76	1	17
7	77	0	326
7	78	3	203
7	79	3	79
7	80	3	74
7	81	1	151
7	82	0	14
7	84	1	115
7	85	0	425
7	86	0	73
7	87	1	62
7	88	0	77
7	89	0	16
7	90	0	23
7	92	2	14
7	93	1	19
7	94	1	17
7	95	2	33
7	96	0	151
8	1	3	14
8	2	3	15
8	3	0	70
8	4	1	15
8	5	0	20
8	7	1	123
8	8	2	79
8	9	1	654
8	10	2	162
8	11	2	246
8	12	0	75
8	13	1	234
8	14	8	17
8	15	2	95
8	16	0	63
8	17	2	212
8	19	0	283
8	20	1	16
8	21	1	13
8	22	1	77
8	23	1	61
8	24	0	81
8	25	1	15
8	26	1	52
8	28	1	23
8	29	0	13
8	30	1	209
8	31	0	55
8	32	0	49
8	33	1	11
8	34	0	13
8	35	0	11
8	36	1	70
8	37	0	14
8	38	0	92
8	39	1	79
8	40	0	185
8	41	0	9
8	42	1	9
8	43	1	32
8	44	9	380
8	45	5	727
8	46	3	94
8	48	0	10
8	49	3	10
8	50	1	131
8	51	2	81
8	52	0	11
8	53	0	52
8	54	2	198
8	55	1	201
8	56	1	51
8	57	1	331
8	58	3	85
8	59	1	75
8	60	0	11
8	62	1	66
8	63	1	14
8	64	0	73
8	65	1	13
8	66	0	18
8	67	1	73
8	68	4	13
8	69	2	25
8	70	2	196
8	71	0	191
8	72	0	145
8	73	0	71
8	74	1	14
8	75	1	73
8	76	2	45
8	77	1	15
8	78	0	13
8	79	2	52
8	80	2	19
8	81	0	16
8	82	1	15
8	84	1	139
8	85	1	70
8	86	2	100
8	87	1	136
8	88	0	17
8	89	0	15
8	90	0	17
8	92	2	65
8	93	2	16
8	94	0	72
8	95	0	460
8	96	0	281
10	1	1	19
10	2	7	75
10	3	9	633
10	4	4	131
10	5	0	19
10	7	4	150
10	8	3	18
10	9	2	83
10	11	2	83
10	12	2	71
10	13	3	56
10	14	3	12
10	15	7	85
10	16	0	64
10	17	0	44
10	18	2	11
10	19	1	43
10	20	1	23
10	21	1	12
10	22	0	18
10	23	0	47
10	24	0	14
10	25	0	63
10	26	3	36
10	27	0	19
10	28	0	22
10	29	0	51
10	30	0	12
10	31	0	73
10	32	1	10
10	33	0	67
10	34	0	85
10	35	0	782
10	36	0	271
10	37	1	235
10	38	1	25
10	39	2	176
10	40	1	74
10	41	1	116
10	42	0	115
10	43	0	166
10	44	4	100
10	45	3	52
10	46	2	154
10	48	2	317
10	49	1	147
10	50	0	44
10	51	1	84
10	52	1	63
10	53	0	68
10	54	1	15
10	55	0	90
10	56	1	184
10	57	0	157
10	58	0	173
10	59	3	27
10	60	1	35
10	61	1	64
10	62	0	135
10	63	0	106
10	64	0	83
10	65	0	84
10	73	0	38
10	74	3	133
10	75	0	78
10	76	0	47
10	77	3	68
10	78	1	53
10	79	0	70
10	80	1	95
10	81	1	117
10	82	0	93
10	83	0	21
10	84	1	16
10	85	0	16
10	86	0	101
10	87	1	14
10	88	1	17
10	89	1	28
10	90	1	132
10	91	0	19
10	92	2	17
10	93	1	14
10	94	2	114
10	95	0	20
10	96	0	17

## Sheet: expt 2 session errors and times
snake	session	errors.by.session	time
11	1	6	383
12	1	5	NA
14	1	6	27
15	1	7	21
16	1	7	303
17	1	11	50
18	1	7	125
11	2	2	137
12	2	2	148
14	2	1	155
15	2	0	155
16	2	8	13
17	2	0	143
18	2	6	303
11	3	1	47
12	3	1	194
13	3	0	69
14	3	1	27
15	3	2	187
17	3	1	358
18	3	5	110
11	4	4	65
12	4	2	282
14	4	4	137
15	4	6	23
16	4	4	72
17	4	1	86
18	4	0	60
11	5	2	67
12	5	2	161
14	5	3	70
15	5	4	358
16	5	5	13
17	5	6	62
18	5	3	107
11	6	2	12
12	6	2	92
13	6	5	185
14	6	2	246
15	6	0	11
17	6	1	129
18	6	5	19
11	7	3	377
12	7	2	240
13	7	0	194
14	7	1	59
15	7	7	55
17	7	1	59
18	7	2	377
11	8	3	236
12	8	1	187
13	8	2	285
14	8	1	166
15	8	2	211
16	8	0	117
17	8	0	150
18	8	3	393
11	9	2	241
12	9	0	211
13	9	5	293
14	9	2	281
15	9	5	86
16	9	3	21
17	9	0	86
18	9	0	74
11	10	0	36
12	10	1	51
13	10	0	143
14	10	0	86
15	10	0	98
16	10	2	106
17	10	4	98
18	10	7	160
11	11	0	106
12	11	2	164
13	11	2	335
14	11	2	296
17	11	2	16
18	11	0	113
11	12	2	102
12	12	1	45
13	12	3	14
14	12	8	19
15	12	1	23
17	12	0	198
18	12	1	181
11	13	1	171
12	13	2	139
13	13	0	113
14	13	1	138
15	13	0	178
17	13	3	98
18	13	5	14
11	14	0	130
12	14	3	130
13	14	0	59
14	14	4	59
15	14	7	277
17	14	1	97
18	14	2	201
11	15	3	177
12	15	1	97
13	15	0	78
14	15	2	201
15	15	6	73
17	15	1	113
18	15	3	143
11	16	2	343
12	16	1	16
14	16	0	50
15	16	4	15
17	16	3	194
18	16	5	14
11	17	0	129
12	17	4	322
13	17	2	88
14	17	1	177
15	17	2	484
17	17	2	446
18	17	3	214
11	18	2	81
12	18	0	145
13	18	3	78
14	18	5	86
15	18	2	148
16	18	7	266
17	18	1	103
18	18	0	214
11	19	6	274
12	19	5	267
14	19	6	414
15	19	7	NA
16	19	7	69
17	19	11	14
18	19	7	91
11	20	2	38
12	20	2	209
14	20	1	424
15	20	0	303
16	20	8	24
17	20	0	120
18	20	6	82
11	21	1	126
12	21	1	424
13	21	0	484
14	21	1	145
15	21	2	303
17	21	1	145
18	21	5	38
11	22	4	295
12	22	2	587
14	22	4	172
15	22	6	NA
16	22	4	18
17	22	1	466
18	22	0	20
11	23	2	587
12	23	1	22
14	23	3	549
15	23	4	525
16	23	5	103
17	23	6	290
18	23	3	478
11	24	2	115
12	24	2	232
13	24	5	346
14	24	2	450
15	24	0	344
17	24	1	232
18	24	5	383
11	25	0	7
12	25	2	958
13	25	6	337
14	25	2	88
15	25	0	115
16	25	6	327
17	25	4	22
18	25	0	227
11	26	2	304
12	26	0	190
13	26	3	344
14	26	0	70
15	26	2	510
17	26	2	318
18	26	3	144
11	27	1	474
12	27	1	163
13	27	0	538
14	27	0	NA
15	27	6	358
17	27	4	922
18	27	0	149
11	28	1	226
12	28	5	764
13	28	5	473
14	28	1	765
15	28	3	450
17	28	3	473
18	28	1	765
11	29	1	133
12	29	0	307
13	29	3	7
14	29	6	21
15	29	5	217
17	29	2	1358
18	29	3	383
11	30	1	682
12	30	2	739
13	30	1	193
14	30	2	52
15	30	6	339
17	30	1	207
18	30	3	NA
11	31	5	34
12	31	2	1358
13	31	1	29
14	31	2	34
15	31	3	580
17	31	1	625
18	31	4	1027
11	32	0	1153
12	32	2	150
14	32	3	525
15	32	0	625
17	32	4	769
18	32	3	673
11	33	1	110
12	33	1	310
13	33	0	628
14	33	2	106
15	33	8	1431
17	33	1	335
18	33	3	945
11	34	0	22
12	34	0	571
13	34	1	322
15	34	1	483
17	34	0	676
18	34	14	1027
11	35	0	346
12	35	0	96
13	35	2	54
14	35	1	221
15	35	2	822
17	35	2	559
18	35	3	156
11	36	1	120
12	36	2	580
13	36	1	29
14	36	2	1085
15	36	3	341
17	36	0	54
18	36	2	1085
11	37	1	695
12	37	2	327
13	37	0	1008
14	37	2	1119
15	37	3	430
17	37	1	29
18	37	6	430
11	38	3	430
12	38	0	1181
13	38	2	63
14	38	1	858
15	38	3	63
17	38	0	466
18	38	0	1181
11	39	1	159
12	39	0	389
13	39	3	308
14	39	3	302
15	39	0	1164
17	39	2	69
18	39	2	466
11	40	1	84
12	40	2	300
13	40	1	1164
14	40	2	99
15	40	4	115
17	40	0	211
18	40	2	157
11	41	2	39
12	41	2	39
13	41	3	547
14	41	2	171
15	41	1	61
17	41	10	553
18	41	2	45
11	42	1	45
12	42	2	90
13	42	3	111
14	42	2	370
15	42	3	376
17	42	1	87
18	42	3	242
11	43	0	48
12	43	2	263
13	43	2	52
14	43	1	31
15	43	1	NA
17	43	0	191
18	43	2	49
11	44	0	51
12	44	2	32
13	44	0	22
15	44	1	211
17	44	3	466
18	44	1	61
11	45	3	226
12	45	0	553
13	45	3	399
14	45	3	349
15	45	4	243
17	45	0	16
18	45	1	NA
11	46	0	135
13	46	1	119
14	46	4	399
15	46	1	226
17	46	2	135
18	46	3	243
11	47	2	21
14	47	6	171
15	47	1	194
12	48	2	693
13	48	3	10
17	48	2	57
18	48	4	517
12	49	0	222
14	49	2	116
15	49	0	311
17	49	1	422
11	50	1	219
13	50	3	16
18	50	4	411

## Sheet: graduations
expt	snake	n.trials	grad.trial
1	1	349	70
1	2	355	19
1	3	311	69
1	4	342	39
1	5	341	52
1	7	324	17
1	8	351	16
1	10	347	58
2	11	158	35
2	12	160	28
2	13	130	9
2	14	155	51
2	15	160	NA	never graduated
2	17	164	12
2	18	164	80
